# Supplementary material for: Agroecological transition delivers win-win outcomes for people and nature
Source: Research Square preprint supplement (doi:10.21203/rs.3.rs-5138070/v1), 2024-11-05
Supplement: Supplementary file 1 [file 3faa5baf00555e512d4e6f4f.pdf]

- 1 **Supplementary Material for:**
- 2 **Agroecological transition delivers win-win outcomes for people and nature**
- 3

## **Supplementary Notes**

### **1. Study context: zero-budget natural farming**

#### ***Description of zero-budget natural farming (ZBNF)***

ZBNF, also sometimes referred to as Andhra Pradesh Community Managed Natural Farming (APCNF) in the southeast Indian state of Andhra Pradesh, is an agroecological farming system that aims to improve farm viability by boosting yields and reducing costs through the use of non-synthetic inputs sourced locally<sup>1</sup>.

‘Zero budget’ refers to the intention of drastically reducing the need for financial inputs and thus ending the farmers’ dependence on external synthetic inputs and agricultural credit<sup>1</sup>. ‘Natural farming’ refers to the agroecological basis on which these expenditure cuts are to be achieved. It involves ‘four wheels’: (1) ‘*jiwamrita*’ – use of a microbial inoculum to stimulate microbial activity to make nutrients available to plants and protect against pathogens; (2) ‘*beejamrita*’ – application of another microbial culture to protect young roots from fungal and soil-borne diseases; (3) ‘*acchadana*’ – mulching to produce stabilised soil organic matter, conserve top-soil, and increase the activity of soil biota; and (4) ‘*whapahasa*’ – improving soil structure and reducing tillage through soil aeration<sup>1,2</sup>. Hence, ZBNF has the potential to considerably improve soil health and consequently the efficiency of nutrient and water use, implying a greater efficiency of crop production<sup>2</sup>. In addition to the ‘four wheels’, farmers are encouraged to plant live fences, keep cover crops, and design fields using a ‘five layer’ multi-cropping model which involves diversifying crop plants and integrating trees<sup>3</sup>.

Self-reports on the direction of change in yield and income after switching to ZBNF have been documented to be predominantly positive<sup>4</sup>. Field samples taken suggest

that ZBNF farmers have higher yields and net incomes than non-ZBNF farmers<sup>1,5</sup>. Controlled field plot experiments similarly suggest yield benefits, albeit the magnitude of the effect is crop- and region-dependent<sup>6</sup>. Duddigan et al<sup>6</sup> propose that ZBNF yield benefits are mediated by mulching's positive effect on earthworm populations and soil moisture, and leading to reduced soil temperature. Whilst ZBNF and conventional farming did not differ in their content of most macronutrients<sup>6</sup>, others have warned that long-term yield penalties may occur when switching from high input systems to ZBNF and stressed that a greater understanding of the potential mechanisms of nitrogen (and other macro- and micronutrient) supply to crops in ZBNF systems is needed<sup>2</sup>.

ZBNF is considered by many government officials the future for sustainable farming in India<sup>7</sup>, and it now represents one of the largest 'experiments' of agroecological intensification globally<sup>2</sup>. It has also been identified as being highly relevant to global biodiversity conservation<sup>8</sup>. However, the strong governmental support is not underpinned by a detailed understanding of how ZBNF affects above- and below-ground ecosystem functions and services, and biodiversity.

#### ***ZBNF as an agricultural system redesign policy in Andhra Pradesh***

The yields of conventional high-input farming systems in India have been declining since the 1990s<sup>9,10</sup>. Andhra Pradesh (AP), a state in the south-east, has had some of the highest per-capita application rates of synthetic pesticides in India<sup>1</sup> as well as the highest rate of indebtedness among farmers<sup>11</sup>. In response to this agrarian crisis, the government of AP is aiming to roll out ZBNF to all six million farmers in the state by 2030<sup>12</sup>. The AP Department of Agriculture set up a dedicated non-profit *Rythu Sadhikara Samstha* (RySS – Farmer's Empowerment Organisation) in 2016 to

facilitate the state-led transition towards ZBNF through extension and training programmes<sup>1</sup>.

RySS is present in all districts and subdistricts (*'mandals'*) in AP. They aim to target farmers from varied socio-economic settings, from high agrichemical and financial input farmers to subsistence tribal farmers, albeit the strength of exposure in each area is influenced, for example, by civil society networks and local leaders<sup>11</sup>. Moreover, as ZBNF adoption is voluntary, the early adopters of ZBNF may differ from the average farmer in AP with regards to characteristics that influence ZBNF programme participation and the yield, profit, and/or biodiversity outcomes. Thus, important social and economic attributes could vary between ZBNF and agrichemical farmers and their landholdings, and these must be addressed if robust inferences are to be drawn.

## **2. Site selection in the field**

To identify the most suitable districts in Andhra Pradesh (AP) within which to conduct our study, we used forest cover (Copernicus Global Land Cover Layer, CGLS-LC100<sup>13</sup>) and Protected Area spatial data to select districts with large, forested areas, with at least some of them not strictly protected (IUCN category II, as obtaining permits to work in strictly protected forest sites would have not been possible and because they are unlikely to represent the management conditions experienced by the farmland sites prior to their conversion to agriculture). The following districts in northern AP were selected: East Godavari, West Godavari, Vizianagaram, Visakhapatnam, and Srikakulam. This region, totalling around 44,000 km<sup>2</sup>, is sufficiently large and socio-ecologically varied to ensure that enough sampling sites fulfilling certain criteria (see below) could be identified and that we

could estimate ZBNF programme impact across conditions, but small enough to make travelling between sites feasible and to reduce bird species turnover and the possibility for unobserved confounders. The agrichemical farming practices that the ZBNF programme aims to replace are varied, as are the socio-economic contexts and biophysical settings. Thus, in order to evaluate the impacts of the ZBNF programme quantitatively we had to sample ZBNF and non-ZBNF sites that are representative of all feasible regional agricultural systems and landscape structures.

### ***ZBNF sites ('squares')***

For these districts, RySS provided us with a list of 206 'ZBNF villages', which are villages where most farmers (approximately >80%) are practicing ZBNF. We removed villages where the farmers had been practicing ZBNF for less than four years (i.e., adoption occurred after 2017), which left us with 101 villages. We contacted the relevant RySS sub-district managers to enquire whether large continuous areas (minimum 500m x 500m; 0.25 km<sup>2</sup>) exclusively farmed using ZBNF practices can be found within the boundaries of the given ZBNF village. Since farmers would frequently trial ZBNF on only a proportion of their land before converting completely, only 39 villages met this requirement.

We chose 25 ha (0.25 km<sup>2</sup>) as we believed that for many bird species this would be the minimum scale at which the farming practice impact on density would manifest itself (see Hill and Hamer, 2004; Kirk et al., 2020). Whilst a larger area would have been desirable, it was impossible to find sites where ZBNF was practiced exclusively. Nonetheless, we required ZBNF to be the dominant farming practice in the surrounding landscape; specifically, at least 75% of the farmed area in the 5 km radius surrounding the centre of square had to be managed under ZBNF.

Furthermore, despite the squares relatively small sizes we regard it as appropriate to refer to them as 'landscapes' given their structural heterogeneity and socio-ecological complexity. In an agroecosystem context, 'landscape-scale' tends not to be defined in absolute geographical scales but is rather based on the scale at which interrelated environmental, economic, and social processes operate, making it highly context-dependent<sup>14</sup>. In our smallholder-dominated system, 'landscape-scale' thus encompasses relatively few hectares.

We mapped the 39 ZBNF villages and overlaid the Copernicus Global Land Cover Layer (CGLS-LC100<sup>13</sup>) with digital elevation data (SRTM V3<sup>15</sup>), slope data (SRTM V3<sup>15</sup>), annual rainfall data<sup>16</sup>, mean annual temperature data<sup>17</sup>, and the Harmonized World Soil Database<sup>18</sup> in Google Earth Engine (GEE). We removed villages that are situated less than 3 km from the nearest land use of a different type (forest, urban, etc.) to minimise edge effects, and sites over 600m in elevation as no agrichemical farming occurs at these altitudes. This left us with 28 villages. None of the ZBNF villages had slope, rainfall, temperature, or soil type characteristics that were unrepresentative of the region, implying that agrichemical and forest sites with similar attributes should be identifiable.

Using Google Earth imagery, we examined the amount of natural and semi-natural habitat patches within a 1 km radius of the village. We conducted visits to the 28 ZBNF villages. We randomised the order of our visits, whilst ensuring that we captured the full spectrum of embedded native vegetation cover and that we equally sampled from 'plain' and 'tribal' areas. 'Tribal' areas are characterised by traditional and indigenous farming practices, low accessibility, and a high proportion of subsistence farmers. In contrast, 'plain' areas, which are nearer to the coast and better connected to agricultural markets, are dominated by farming systems that

have adopted high use of pesticide, fertilizer, irrigation, and agricultural credit<sup>5</sup>. Thus, in order to obtain an unbiased estimate of the ZBNF programme's impact, we had to sample from both areas.

At each site, we mapped the outline of the largest continuous area under ZBNF using a handheld GPS and with the help of RySS staff and farmers. We also obtained information on the crops grown, the management practices, and the types of farming practiced in the wider region, and recorded landscape features, such as remnant native trees and riparian buffers. We had to exclude many sites as the area under ZBNF was smaller than we were initially informed. We then visualised the remaining 13 sites in QGIS using Google Earth imagery and placed a 500m x 500m square within the area under ZBNF. Farmers at those sites transitioned from agrichemical farming to ZBNF between 2016 and 2017.

#### ***Agrichemical sites ('squares')***

We aimed to identify 13 agrichemical squares that had similar attributes as the ZBNF squares. Hence, we marked farmland areas within approximately 15 km of each ZBNF square that had the same soil type and were similar in elevation, temperature, rainfall, slope and amount of natural habitat patches embedded in the agricultural landscape. They were also within the same area (i.e., 'tribal' or 'plain'). We then randomly placed 500 x 500m squares within those areas, again requiring sites to be at least 3 km from the nearest land-use of a different kind. We conducted field visits to enquire about the farming practices employed, and we confirmed with local agricultural scientists and practitioners that the selected sites are indeed likely to capture the full range of management practices and agricultural productivity found across the districts.

### ***Forest sites ('squares')***

To identify forest sites, we overlayed Copernicus land-use, Landsat imagery, soil type, elevation, slope, rainfall, temperature, and protected area boundary layers in GEE. We clipped out areas of high (>600 m) elevation and National Parks, excluded forests of less than 100 km<sup>2</sup> and areas less than 3 km from the forest edge, and sought sites with similar attributes of the other variables to the agricultural squares.

As in many parts of the world<sup>19,20</sup>, the remaining forests in our study region are predominantly where opportunity costs (i.e. income lost by not farming) are low, e.g., at comparatively higher elevations, further from cities, and on uneven terrain. Thus, a limited number of sites met the above-mentioned biophysical criteria. We randomly placed 25 500 x 500 m squares within suitable areas, whilst ensuring that sites were distributed across the study region (see Supplementary Figure 1). We conducted site visits to assess their suitability and accessibility and consulted local ecologists and to confirm our sites were representative of the forest types found in the region.

### **3. Farmer interviews, yield and profit calculations**

With the help of local villagers, we identified the people managing the fields upon which the four points in each square were located and as well as up to two more fields in the square we randomly selected. The interview protocol was informed by discussions with, and was trialled on, farmers and RySS staff. We frequently disaggregated questions into components, for example, for a given task such as fertilizing, we asked how many times per year the field was fertilized, how many days and how many people per day it took, and if the people were paid (and if so, how much). We also asked for yield data over the last three years, whether and how management of the field, yield, and expenditure had changed over the last decade



and what the reasons for the observed changes (if any) may be. However, we did not include this information in further analyses due to recall issues. We prepared the questionnaire in English but conducted the interviews in Telugu (the local language). The full set of interview questions are given in Supplementary Table 10. We received ethical approval from the Cambridge Psychology Research Ethics Committee (approval code PRE.2022.090).

We enquired about the size of each focal field (in acres) and verified the answers on a random subset using a handheld GPS in the field and/or QGIS. In the few instances where self-reported yield or cost values seemed implausible, we followed up using phone calls which resolved the issues. Furthermore, we cross-checked that reported yield values are feasible using district-level government statistics<sup>9</sup> and checked with local vendors that the reported input costs are plausible.

We standardised the yield and cost data into per-acre values, and we used simple crop plant lifecycle models based on the information received by the farmers to estimate average annual costs, yields, and revenues of each crop at each field (following<sup>21</sup>). For annual crops no further calculations were necessary to estimate annual yield. We used the most recent (season 2022/2023) self-reported values. Whilst using the repeat-measures of yield would have allowed us to better account for time-varying confounders, farmers noticeably varied in their ability to recall information older than one year, meaning that a considerable number (if not most) of the estimates would have been unreliable.

For tree crops (cashew and coconut) we used the following formula to estimate the annual average yield ( $Y$ ) per crop, where  $m$  is the number of years the crop is mature,  $Y_m$  the yield of the crop in a mature year, and  $i$  are immature stages with

different yields in those years respectively ( $Y_i$ ; where some years will be zero-yielding):

$$Y = \frac{i_1 Y_{i1} + i_2 Y_{i2} + \dots + m Y_m}{i_1 + i_2 + \dots + m}$$

In order to obtain a total measure of yield per annum per unit area into a common currency, we converted the estimates of mean net annual yield for each crop into a common unit, namely food energy. Since farmers largely reported the pre-processing harvest, we first subtracted the proportion of the harvested product that is uneaten (husks, peels, etc.) and then converted the remaining mass into GJ/acre to estimate the energetic value of each harvest, i.e., harvest-level productivity (see Table S1). We then calculated the sum of the GJ/hectare values of all crops grown on the same field in a year to obtain an estimate of the total annual yield (GJ/hectare) per field.

In addition to these harvest- and field-level productivity estimates, which we used to estimate the effect of the ZBNF programme on yield and profit, we also estimated square-level productivity where we had to account for the forgone production of native and semi-native vegetation patches embedded in the squares. These patches are small forest fragments (< 0.02 km<sup>2</sup>), individual native or naturalised trees, and riparian buffers, and hedges. We estimated the area under these patches, tree crops, and cropland by conducting site visits with a handheld GPS and using QGIS. We calculated the mean of the field-level yield (weighted by field size) for each square for tree and non-tree crops separately and then multiplied these estimates by the area under tree crops and cropland respectively, and then summed the two to obtain estimates of the total annual production (in GJ) per square. We used these square-level productivity estimates to look at the relationships between bird densities and yield, at 25 ha level, for each farming practice.

221 In order to estimate annual economic profit, we first calculated income using the ten-  
222 year mean wholesale state-level prices per unit weight of each crop between 2013-  
223 2023, where we took the January prices from each year<sup>9</sup> and adjusted them for  
224 inflation to 2023 values (using the Consumer Price Index<sup>22</sup>). We then estimated the  
225 per harvest (hectare<sup>-1</sup>) and subsequently annual revenue (hectare<sup>-1</sup> year<sup>-1</sup>) for each  
226 field (in the same manner as for food energy).

227 Costs were composed of input costs (e.g., agrochemicals, ZBNF 'wheels', irrigation,  
228 seeds), labour costs (wage and/or family labour), equipment rental and/or purchases  
229 (e.g., bullock cart, spade, axe, sprayer, tractor), and equipment maintenance costs  
230 (e.g., fuel, electricity), but excluded land tenure costs. In all instances we used the  
231 costs as reported by the farmers. The same piece of equipment as well as wage  
232 labour may be priced slightly differently in different villages, and access to and ability  
233 to process ingredients varies between farmers and regions (e.g., the ingredients and  
234 their relative proportion in a given ZBNF 'wheel' can vary between villages according  
235 to availability, and the costs of a ZBNF 'wheel' may vary depending on whether it is  
236 prepared by the farmers themselves or whether it is purchased from someone else in  
237 the village). Whilst this introduces heterogeneity, it represents the information upon  
238 which the farmers make agroeconomic decisions and reflects the spectrum of how  
239 each farming practice is manifested in the region. We costed family labour at the  
240 minimum wage rate (separately for females and males) as reported by each farmer.  
241 For equipment, we divided the purchase cost by the expected lifetime of the item (as  
242 reported by the farmer) and, where it was shared with other fields, by the total area  
243 of the fields combined to obtain a yearly per acre cost value. For fields where not all  
244 activities are conducted yearly (e.g., when perennial crops are grown or when land  
245 levelling only occurs every five years), we estimated the annual cost by dividing by

the number of years between activities or the length of the crop lifecycle as appropriate.

We estimated the mean annual cost per acre per annum for each field which we then subtracted from the revenue to estimate the profit (INR hectare<sup>-1</sup> year<sup>-1</sup>). Square-level estimates were estimated in the same manner as for annual food energy production.

Notably, irrigation and most agrichemical substances are subsidised, with farmers paying frequently around two-thirds of the market value of the product. We chose to use the subsidised prices (i.e., those paid by the farmers) since we wanted to estimate the impact of the ZBNF programme under the current agri-environmental policy landscape within which farmers are making their management decisions. Notably, any positive impact of ZBNF on profit would be greater if these subsidies were abolished.

#### **4. Bird surveys**

##### ***Data collection***

Surveying in both the winter and summer seasons allowed us to record species mainly vocal during the breeding season as well as winter migrants. It also allowed us to capture fluctuating relative resource availability in the different habitat types and surveying repeatedly across years allowed us to account for time-varying square-level confounders.

We avoided conditions of rain, fog, or high winds. In forest squares, where access to points was often difficult because of thick vegetation, we located and marked each point at least one day in advance and, where necessary, cut an access route, clearing sufficient vegetation at each point to allow us stand and turn unimpeded.

270 We quantified the proportion of ‘closed’ habitats (i.e., features that impaired  
271 detectability such as trees, hedges, and high crops) around each survey point using  
272 a handheld GPS during our field visits, and QGIS. For forest points, the proportion  
273 equalled one.

274 We measured the horizontal distance from the point to the location of the centre of  
275 each cluster or individual bird when it was first detected, using a laser rangefinder,  
276 based on direct distance to the bird(s) and angle of elevation. For individuals  
277 detected aurally but not seen, we measured the distance to the tree (or other  
278 feature) from which the bird vocalized. We recorded all counts (using a Sony PCM-  
279 D100 recorder and a Sennheiser ME66 shotgun microphone) so that uncertain  
280 identifications could be checked later with experts and/or reference material  
281 consulted.

## 282 ***Data processing***

283 We discarded records of species that point counts do not adequately sample,  
284 namely largely aerial and/or transient species (following<sup>23</sup>). Thus, we removed swifts  
285 and swallows (*Apus affinis*, *Cecropis daurica*, *Cypsiurus balasiensis*, *Hirundo rustica*,  
286 and *Hirundo smithii*), large raptors (*Accipiter badius*, *Circaetus gallicus*, *Circus*  
287 *aeruginosus*, *Elanus caeruleus*, *Falco chicquera*, *Haliastur indus*, *Milvus migrans*,  
288 *Pernis ptilorhynchus*, and *Spilornis cheela*), and oriental pratincoles *Glareola*  
289 *maldivarum* (which only briefly migrated through our study region).

## 290 ***Distance sampling***

291 We examined fitted detection models by visually checking quantile-quantile plots and  
292 the shape of the detection function, and we conducted Chi-square, Kolmogorov-  
293 Smirnov and Cramer-von-Mises tests. We removed models that resulted in a poor fit

or failed to converge. If a given species or group at a given site had well-fitting habitat type specific models (forest or farmland respectively) then we chose these and selected the one with the lowest AICc from amongst the possible key function-adjustment term combinations (see Methods). If no habitat type specific detection function resulted in a good fit, then we used AICc to select the model with the lowest AICc amongst all the single species or group specific detection functions (those with and without the proportion of closed habitat as a covariate). In all instances, we chose single over multi-species detection functions if available for a given species. Once we had a complete set of fitted detection functions, we obtained effective detection radii for each model at each point.

## **5. Statistical matching**

Statistical matching involves identifying appropriate controls and is one of the most commonly used impact evaluation methods<sup>24</sup>. Specifically, it entails matching treatment and counterfactual units on predefined measurable characteristics that influence both the likelihood of a unit being subjected to an intervention or programme and the outcome of interest, ultimately aiming to balance distribution of covariates in the treated and counterfactual groups<sup>24, 25, 26</sup>.

The covariates we matched on prior to assessing ZBNF's impact on yield are described in Supplementary Table 2. We did not match on whether the site was within a 'tribal' or 'plain' area as this was already exactly balanced between the two farming practices (see Supplementary Information 2) and because the covariates we did match on are part of what characterises the two areas but are mechanistically more closely linked to the outcome. We conducted additional analyses for the 'plain' and 'tribal' farmers separately, and only using rice harvest data from the main

318 ('kharif') harvesting season (see Supplementary Information 6; Supplementary  
319 Figures 5-7).

320 Since most farmers did not know the exact variety of crop planted, we could not  
321 include it as a matching covariate. However, all farmers interviewed obtain seeds in  
322 the same manner: they buy new seeds from the government on a decadal basis and  
323 in between that use seeds from the previous year's harvest. Each of the 'paired'  
324 ZBNF and agrichemical squares farmers obtained new seeds from the government  
325 in the same year, and we thus believe it valid to assume that they are the same  
326 variety.

327 Prior to assessing ZBNF's impact on profit, we only matched on agroecological  
328 suitability (Supplementary Figure 3). This is because many potential confounders are  
329 captured by the way we estimated profit. We used the same crop price indices for all  
330 samples (rather than farmer-reported prices; see Supplementary Information 3), and  
331 the crops grown are on average the same between ZBNF and agrichemical farmers  
332 (i.e. 'crop type' was balanced, see Supplementary Figure 2). Nonetheless, to ensure  
333 the robustness of our conclusions, we conducted an additional analysis where we  
334 matched on the travel time to the nearest city, the percentage of habitat patches, the  
335 number of harvests grown per year at the given field, whether at least one of the  
336 harvests was irrigated, and ownership status (owner or tenure farmer; see  
337 Supplementary Figure 4).

338 In all instances, the estimand targeted was the average treatment effect in the  
339 treated (ATT; i.e., the effect of transitioning to ZBNF for the farmers that did so). The  
340 ZBNF programme was not randomly rolled out, but farmers choose whether to adopt

341 ZBNF which meant that targeting the average treatment effect in the population  
342 (ATE) was not possible<sup>27</sup>.

343 We tested two different methods of measuring distance between treatment (ZBNF)  
344 and control (agrichemical farming) groups, namely Mahalanobis and Propensity  
345 Score distance. Mahalanobis distance matching calculates how many standard  
346 deviations a unit is from the mean of other units<sup>28</sup>, whereas propensity score  
347 matching combines all covariates into a single distance measure which then  
348 estimates the probability of units receiving the treatment<sup>29</sup>. Whilst propensity score  
349 matching is the most commonly used method, it has recently received criticism<sup>30</sup>,  
350 with examples of Mahalanobis outperforming it (e.g.<sup>31</sup>).

351 We tested both distance measures with the nearest neighbour<sup>32</sup> as well as the full  
352 matching algorithm<sup>33</sup>. Nearest neighbour matching is one of the most common  
353 algorithms. It selects for each treatment unit at least one control unit with the shortest  
354 distance values between these units<sup>32,34</sup>. Full matching uses all available units in the  
355 data by forming subgroups containing one treated unit and one or more control units  
356 (or vice versa) and assigning weights based on subclass membership which are then  
357 used to estimate a weighted treatment effect<sup>35</sup>. Full matching is particularly well  
358 suited for analysing data sets with similar number of treatment and control units<sup>24</sup>  
359 which applies to our data.

360 However, the algorithm that most frequently performs well in environmental studies  
361 is genetic matching<sup>36, 37</sup>. Genetic matching entails iterative searches to maximise the  
362 balance of covariates between treatment and control and it is based on a  
363 generalization of the Mahalanobis distance which additionally involves a weight  
364 matrix<sup>38</sup>. As recommended by Diamond and Sekhon<sup>38</sup> we first generated a



propensity score based on the above-described covariates and then conducted genetic matching on these covariates as well as on the propensity score. However, due to criticism of this approach<sup>30</sup>, we also conducted genetic matching without the propensity score. Since balance may be easier to achieve this way, we also conducted genetic matching where we only included the most important covariates (agroecological suitability, habitat patches, and crop type) in the calculation of distance and weights, but still optimised balance on all covariates.

For all distance metric-matching algorithm combinations (apart from full matching), we conducted matching both with and without replacement, the former meaning that controls can be reused and matched to multiple treatment units which tends to yield better balance<sup>39</sup>. Since we had data on more ZBNF (i.e., treatment) than agrichemical (i.e., control) harvests (115 and 87 respectively) and fields (66 and 55 respectively), we expected matching with replacement to perform better. Supplementary Table 3 provides more details on the different matching runs conducted.

Notably, we employed matching ex-post, i.e., we used it after conducting field surveys to assess covariate balance and if needed to discard or weigh sampling units. We did not use it prior to that because some of the matching covariates were only collected as part of our field surveys and because we predominately matched at the sub-square level. Furthermore, by seeking to select sites of the same soil type and similar climate and terrain attributes we ultimately replicated the theory underpinning matching (i.e., accounting for observable confounders), albeit without the analytical rigour. For most analyses we did not match directly on the above attributes, but instead on agroecological suitability because the former are

encompassed in the latter and matching covariates should be kept to a minimum to ensure that suitable matches can be found<sup>24</sup>.

Matching is unlikely to remove all bias as matching is imperfect in finite samples and because there are always unobservable confounding factors<sup>36,40</sup>. For example, the covariates we matched on do not capture the complexity of the psychosocial characteristics of the farmers, including their perceptions, attitudes, and social norms that influence ZBNF uptake. Having pairs of ZBNF and agrichemical sites in close proximity to one another increases the likelihood that farmers from both groups are influenced by similar cultural and social norms, and have similar psychosocial characteristics, but it does not guarantee it.

## **6. ZBNF impact on yield: robustness checks**

We initially fitted a model with a more complex nested random effect structure where field was nested within square, but this model was overfitted. Hence, we only included square as a random term in the main model. This meant that the non-independence of repeat harvests of the same fields across seasons (which was the case for 47.1% ZBNF and 51.7% agrichemical fields) was not entirely accounted for. However, fields are managed fundamentally differently in the winter ('kharif') and summer ('rabi') harvesting seasons. The winter crop, which is almost exclusively rice, represents the main crop. It is economically and culturally much more important to the farmers, often involving high labour and resource inputs. In contrast, only around half of the farmers grow a summer crop which is seen as a bonus and is largely for their own consumption and/or to improve soil health. It usually simply involves throwing seeds of various legume varieties (usually 'blackgram' or 'greengram') with little inputs and labour involved.

By matching on crop type, on whether the harvest was rainfed or irrigated, and on the proportion of the harvest sold we ensured that harvest season level characteristics would not confound our results. Nonetheless, we also repeated the main analyses but only with the data from the main ('kharif') harvest of rice. We matched on the same covariates as we did in our main analyses apart from crop type (since we only sampled rice harvests) and travel time to the nearest city (since it was correlated with agroecological suitability). Four matching runs achieved balance with a sufficiently large sample size (Supplementary Figure 5) and all post-matching analyses suggest that ZBNF does not affect 'kharif' rice productivity (Supplementary Table 4).

With the expectation that the impact of ZBNF hinges on the agricultural system it is replacing, we subdivided our data into harvests from the 'plain' and 'tribal' area (see Supplementary Information 2). Two matching runs each met our balance and sample size criteria (Supplementary Figure 6 & 7) and found that ZBNF does neither affect productivity in the 'plain' nor 'tribal' areas (Supplementary Table 4).

## **7. Trade-offs between productivity and bird conservation: additional notes**

In addition to the model described in the main text, we also fitted a model that included the percentage cover of native and semi-native vegetation in a given square as a fixed term. However, this model failed to converge (i.e., Rhat values were  $> 1$ ). Nonetheless, the effect of vegetation cover on productivity is internalised in the main model since any forgone food production associated with these vegetation patches has been accounted for when calculating square-level yield and profit (see Supplementary Information 3).

Our analysis of the impact of the ZBNF programme on bird densities aims to disentangle causal relationships by using statistical matching to control for confounding factors that may bias our estimates of ZBNF. We did not include square-level productivity in these analyses, because the relationship between the covariates and the outcome cannot be validly interpreted post matching (as the covariates were balanced between groups; termed the Table 2 fallacy<sup>41</sup>).

The outcomes of our main model examining density-productivity relationships should not be interpreted as causal effects of agricultural intensification on bird densities, but, instead, an assessment of the trade-offs between increasing agricultural productivity at the landscape-scale (a product of field-level management and landscape-level vegetation cover) and bird species densities. The square-level percentage cover of native and semi-native vegetation was similarly low for both farming systems (Wilcoxon–Mann–Whitney test,  $P = 0.118$ ), where 84% of all squares had vegetation covers of less than 15%. Thus, square-level productivity and thus productivity-density relationships are likely to be largely, but not exclusively, driven by field-level management.

## **8. Bray-Curtis dissimilarity index at the square-level**

We repeated our analysis of the community similarity of ZBNF and of agrichemical systems to natural forests at the square-level, meaning that we calculated the Bray-Curtis dissimilarity index between each ZBNF and each forest square as well as between each agrichemical and each forest square. Our model was similar to that described in Formula 4 (see Methods), but without the nested random effect structure (of points nested within squares). The results were similar: ZBNF improved overall community integrity by 3.9% (2.86 to 4.96%) relative to agrichemical farming,

where the Bray-Curtis dissimilarity index between forests and ZBNF was 0.89 [95% CI: 0.88 to 0.90]] and between forests and agrichemical systems 0.93 [0.92 to 0.93]. That the Bray-Curtis indices were estimated to be slightly lower at the square-level than at the point-level (i.e. the forest and agricultural communities estimated to be more similar) could be due to a relatively high species turnover resulting in a high dissimilarity of points within a given square.

## **References**

1. Bharucha, Z. P., Mitjans S. B., and Pretty, J. Towards redesign at scale through zero budget natural farming in Andhra Pradesh, India. *International Journal of Agricultural Sustainability* 18.1, 1-20 (2020)
2. Smith, J., Yeluripati, J., Smith, P. and Nayak, D.R. Potential yield challenges to scale-up of zero budget natural farming. *Nature sustainability* 3(3), 247-252 (2020)
3. Khadse, A. and Rosset, P.M. Zero Budget Natural Farming in India—from inception to institutionalization. *Agroecology and Sustainable Food Systems*, 43(7-8), 848-871 (2019)
4. Khadse, A., Rosset, P.M., Morales, H. and Ferguson, B.G. Taking agroecology to scale: The zero budget natural farming peasant movement in Karnataka, India. *The Journal of Peasant Studies* 45(1), 192-219 (2018)
5. GIST Impact Report. *Natural Farming Through a Wide-Angle Lens: True Cost Accounting Study of Community Managed Natural Farming in Andhra Pradesh, India*. GIST Impact, Switzerland and India (2023)
6. Duddigan, S. et al. Natural farming improves crop yield in SE India when compared to conventional or organic systems by enhancing soil quality. *Agronomy for Sustainable Development* 43.2, 1-15 (2023)

7. Sitharaman, N. Budget 2019–2020 speech. *India Ministry of Finance* (5 July 2019); <https://www.indiabudget.gov.in/budgetspeech.php>
8. Sutherland, W. J., et al. A 2021 horizon scan of emerging global biological conservation issues. *Trends in Ecology & Evolution* 36.1, 87-97 (2021)
9. ICRISAT–TCI. *District Level Data for India (DLD)*. <http://data.icrisat.org/dld/> (2020)
10. Ray, D. K., et al. Recent patterns of crop yield growth and stagnation. *Nature communications* 3.1, 1293 (2012)
11. Veluguri, D., et al. Political analysis of the adoption of the Zero-Budget natural farming program in Andhra Pradesh, India. *Agroecology and Sustainable Food Systems* 45.6, 907-930 (2021)
12. *Zero Budget Natural Farming* <http://apzbnf.in> (RySS, Government of Andhra Pradesh, 2024).
13. Buchhorn, M. et al. Copernicus global land cover layers—collection 2. *Remote Sensing* 12.6, 1044 (2020)
14. Pereponova, A., et al. Use of the term “landscape” in sustainable agriculture research: a literature review. *Heliyon* 9,11, e22173 (2023)
15. Farr, T. G., et al. The shuttle radar topography mission. *Reviews of geophysics* 45.2 (2007)
16. Funk, C. et al. The climate hazards infrared precipitation with stations—a new environmental record for monitoring extremes. *Scientific data* 2.1, 1-21 (2015)
17. Hersbach, H., et al. The ERA5 global reanalysis. *Quarterly Journal of the Royal Meteorological Society* 146.730, 1999-2049 (2020)

18. Nachtergaele, F. et al. The harmonized world soil database. *Proceedings of the 19th World Congress of Soil Science, Soil Solutions for a Changing World*, 1-6 (2010)
19. Joppa, L.N. and Pfaff, A., High and far: biases in the location of protected areas. *PloS one*, 4(12), p.e8273 (2009)
20. Robalino, J.A. and Pfaff, A. Contagious development: Neighbor interactions in deforestation. *Journal of Development Economics*, 97(2), pp.427-436 (2012)
21. Phalan, B., Onial, M., Balmford, A. and Green, R.E. Reconciling food production and biodiversity conservation: land sharing and land sparing compared. *Science*, 333, 1289-1291 (2011)
22. International Monetary Fund. *Consumer Price Index*  
<https://data.imf.org/?sk=4ffb52b2-3653-409a-b471-d47b46d904b5> (2024)
23. Gilroy, James J., et al. EDITOR'S CHOICE: Surrounding habitats mediate the trade-off between land-sharing and land-sparing agriculture in the tropics. *Journal of applied ecology* 51.5, 1337-1346 (2014)
24. Schleicher, J. et al. Statistical matching for conservation science. *Conservation Biology* 34.3, 538-549 (2020)
25. Morgan, S.L. and Harding, D.J. Matching estimators of causal effects: Prospects and pitfalls in theory and practice. *Sociological methods & research*, 35(1), 3-60 (2006)
26. Stuart, E. A. Matching methods for causal inference: A review and a look forward." *Statistical science: a review journal of the Institute of Mathematical Statistics* 25.1, 1 (2010)
27. Greifer, N. and Stuart, E.A. Choosing the estimand when matching or weighting in observational studies. *arXiv e-prints*, pp.arXiv-2106 (2021)

28. Rasolofoson, R.A., Ferraro, P.J., Jenkins, C.N. and Jones, J.P. Effectiveness of community forest management at reducing deforestation in Madagascar. *Biological Conservation* 184, 271-277 (2015)
29. Rosenbaum, P.R. and Rubin, D.B. The central role of the propensity score in observational studies for causal effects. *Biometrika*, 70(1), 41-55 (1983)
30. King, G. and Nielsen, R. Why propensity scores should not be used for matching. *Political analysis*, 27(4), 435-454 (2019)
31. Wauchope, H. S., et al. Protected areas have a mixed impact on waterbirds, but management helps. *Nature* 605.7908, 103-107 (2022)
32. Althausen, R.P. and Rubin, D., 1970. The computerized construction of a matched sample. *American Journal of Sociology*, 76(2), 325-346 (1970)
33. Rosenbaum, P.R. *Overt bias in observational studies* Springer New York (2002)
34. Rubin, D.B., Bias reduction using Mahalanobis-metric matching. *Biometrics* 293-298 (1980)
35. Hansen, B.B. Full matching in an observational study of coaching for the SAT. *Journal of the American Statistical Association*, 99(467), 609-618 (2004)
36. Ferraro, P.J. and Simorangkir, R. Conditional cash transfers to alleviate poverty also reduced deforestation in Indonesia. *Science Advances*, 6(24), p.eaaz1298 (2020)
37. Ribas, L.G., Pressey, R.L. and Bini, L.M. Estimating counterfactuals for evaluation of ecological and conservation impact: an introduction to matching methods. *Biological Reviews*, 96(4), 1186-1204 (2021)
38. Diamond, A. and Sekhon, J.S. Genetic matching for estimating causal effects: A general multivariate matching method for achieving balance in



558           observational studies. *Review of Economics and Statistics*, 95(3), 932-945  
559           (2013)

560   39. Austin, P.C. The performance of different propensity score methods for  
561       estimating marginal hazard ratios. *Statistics in medicine*, 32(16), 2837-2849  
562       (2013)

563   40. Rasolofoson, R.A. Statistical matching for conservation science revisited:  
564       response to Schleicher et al. 2020. *Conservation biology*, 36(6) (2022)

565   41. Westreich, D. and Greenland, S. The table 2 fallacy: presenting and  
566       interpreting confounder and modifier coefficients. *American journal of*  
567       *epidemiology*, 177(4), 292-298 (2013)

568

## Supplementary Figures

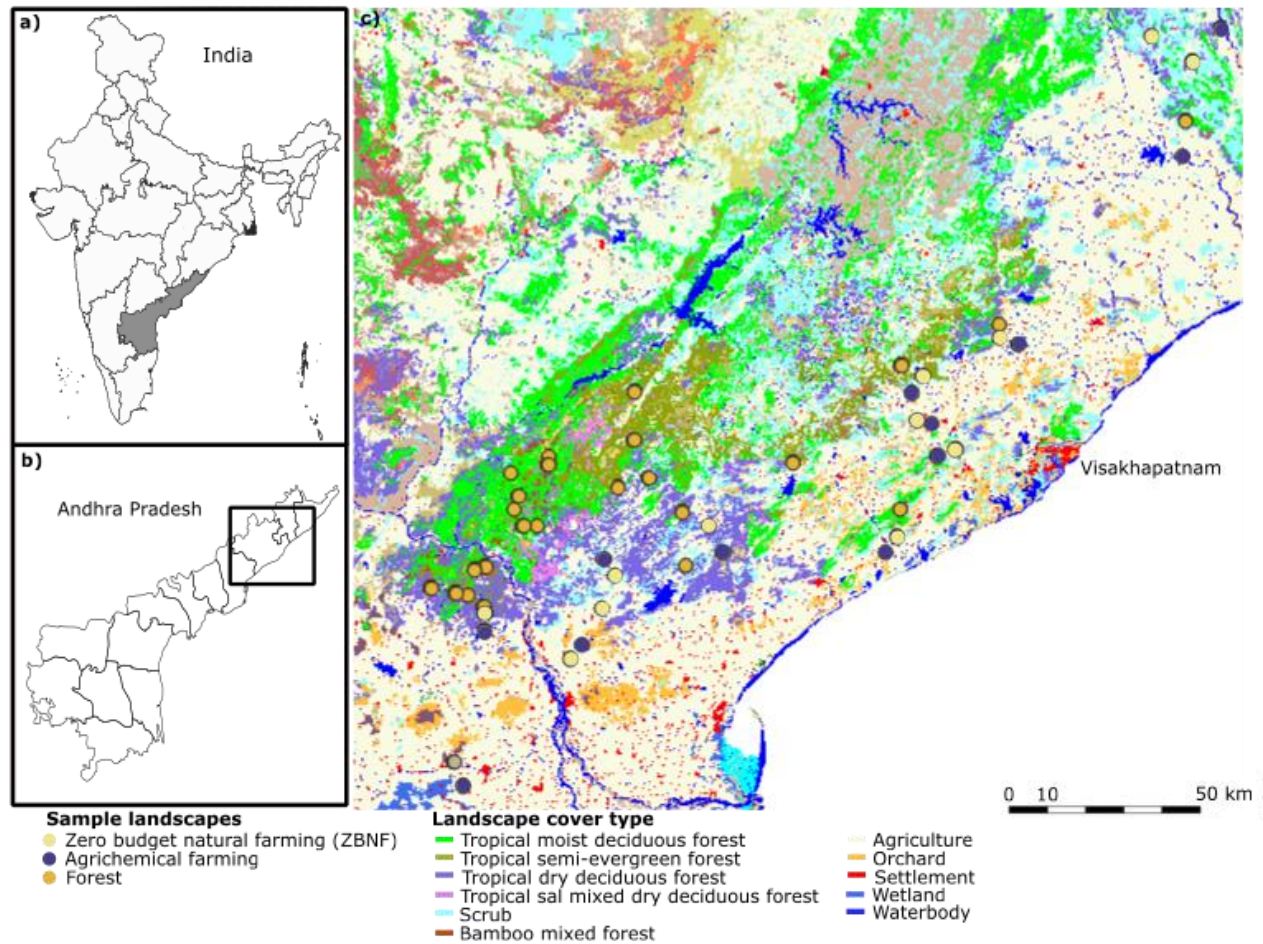

**Figure S1.** Overview of study locations. a) State boundaries within India with Andhra Pradesh shaded in. b) Map of the districts within Andhra Pradesh with the study region highlighted. c) Study area with different land cover types (from Roy et al., 2015) and the study sites depicted.

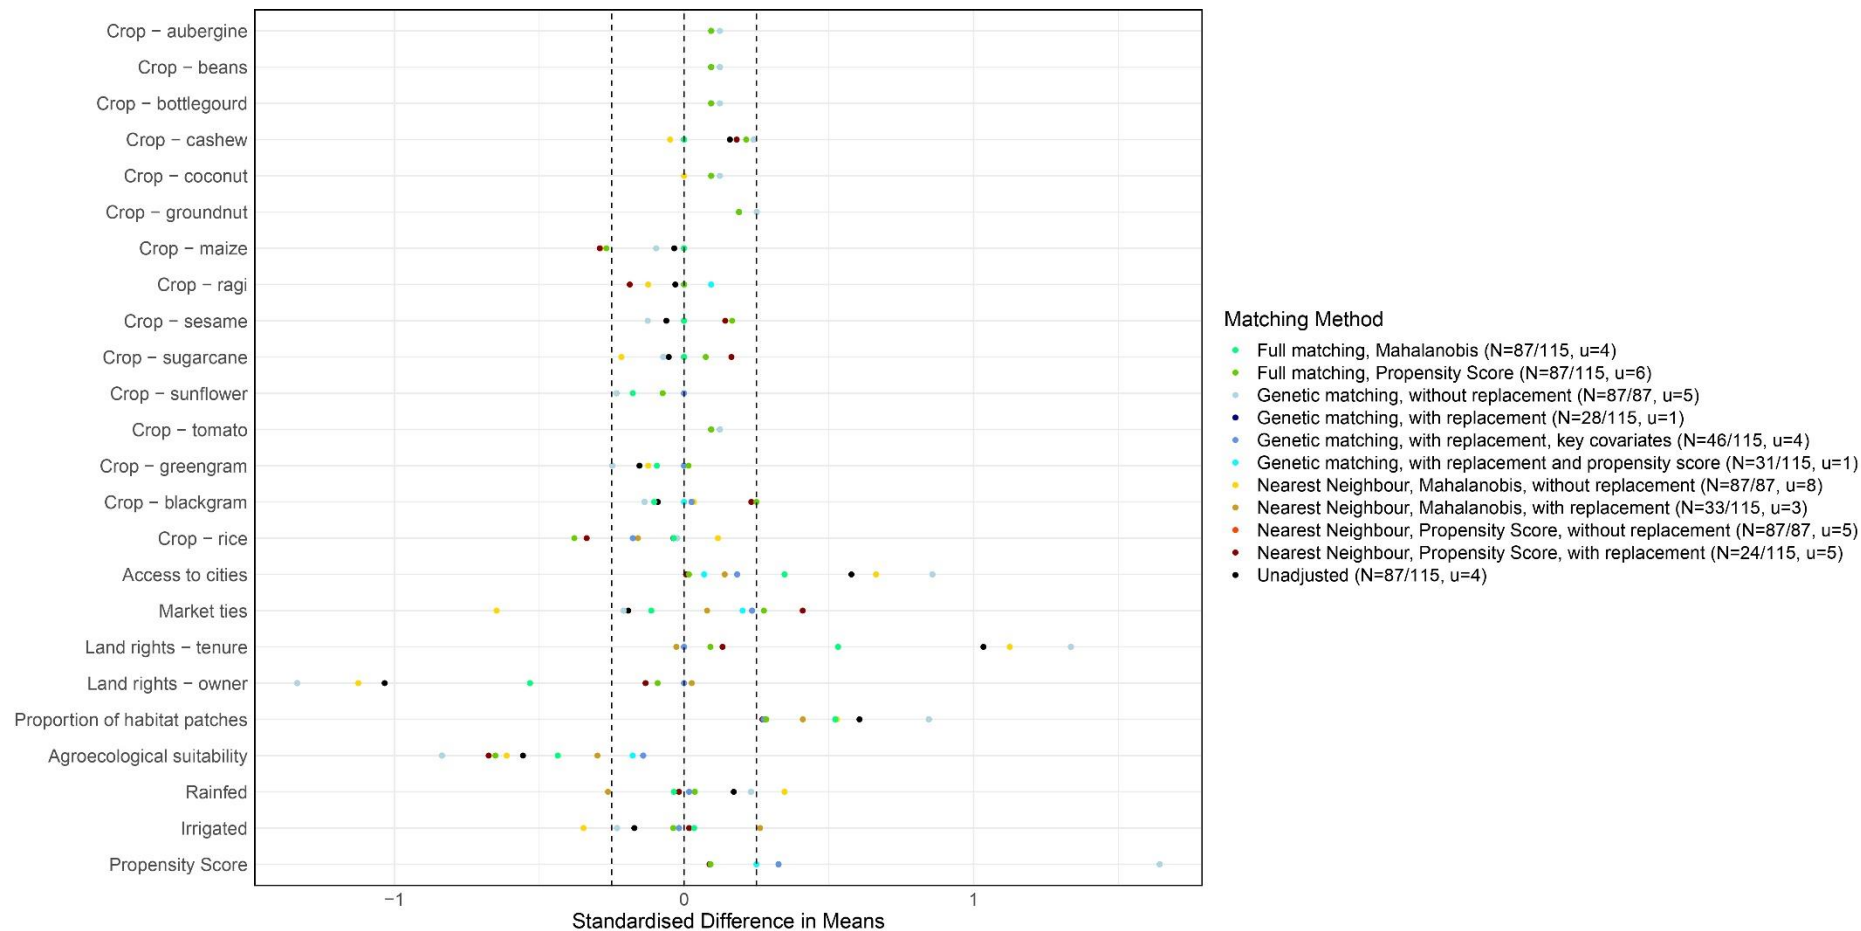

**Figure S2.** Standardised difference in means of matching covariates between ZBNF and agrichemical harvests. The legend describes the different matching runs, with the sample size (N= agrichemical/ZBNF harvests) and the number of covariates with an SDiM > 0.25 (u) in brackets.

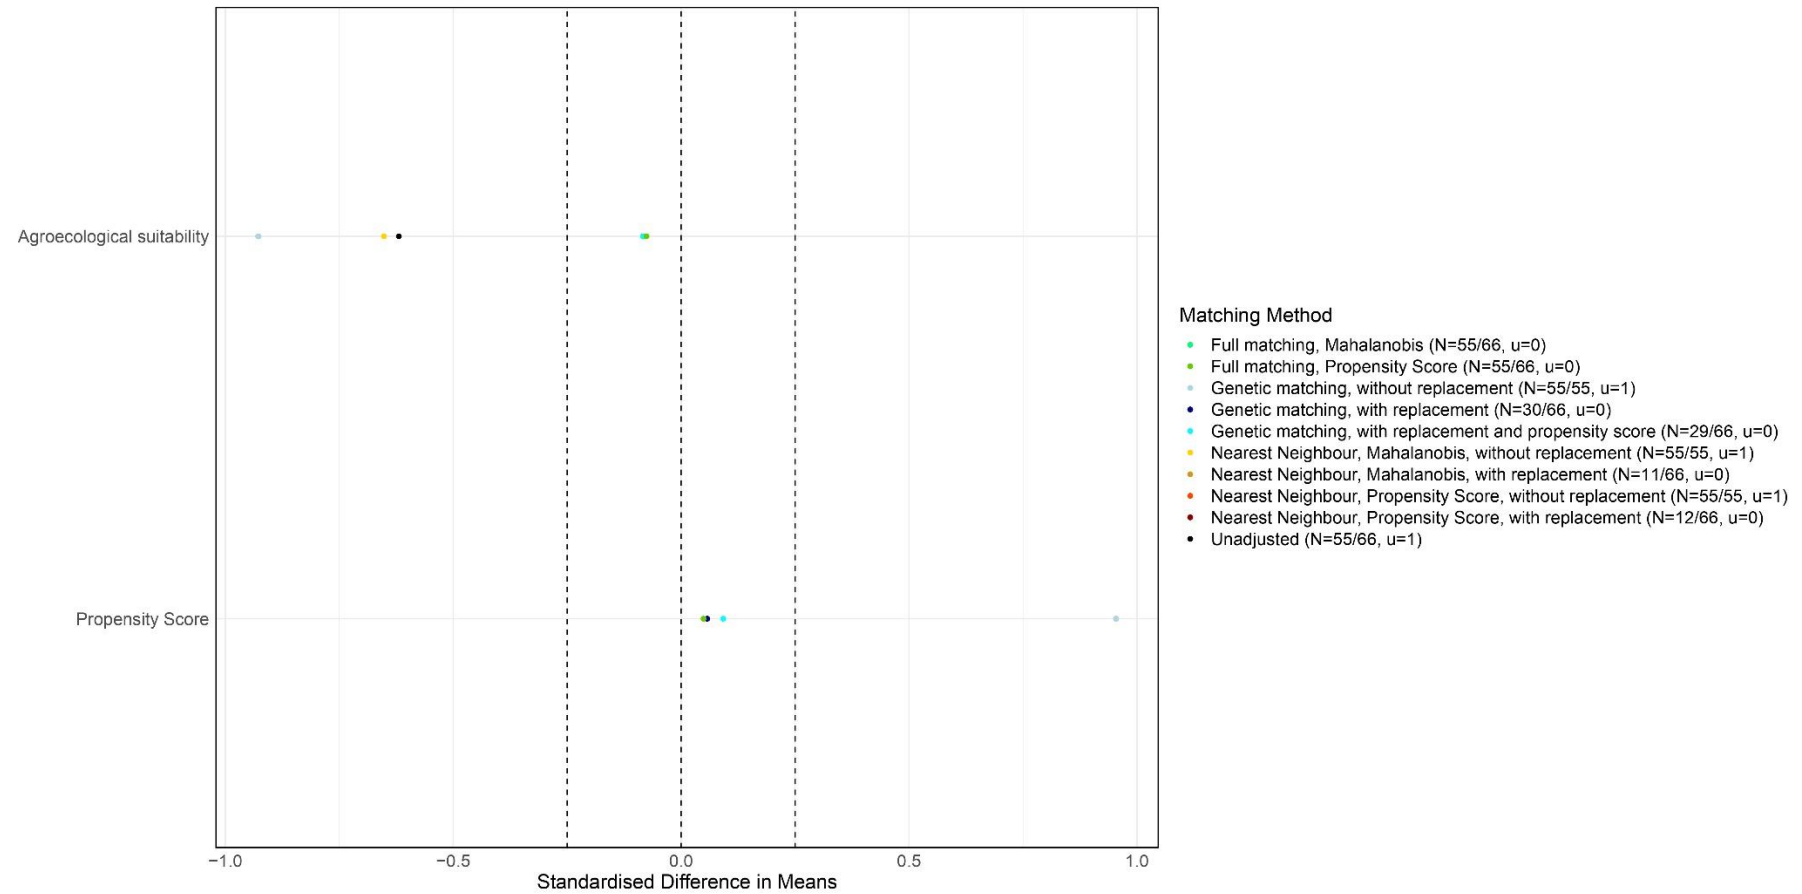

**Figure S3.** Standardised difference in means of matching covariates between ZBNF and agrichemical fields. The legend describes the different matching runs, with the sample size (N= agrichemical/ZBNF harvests) and the number of covariates with an SDiM > 0.25 (u) in brackets.

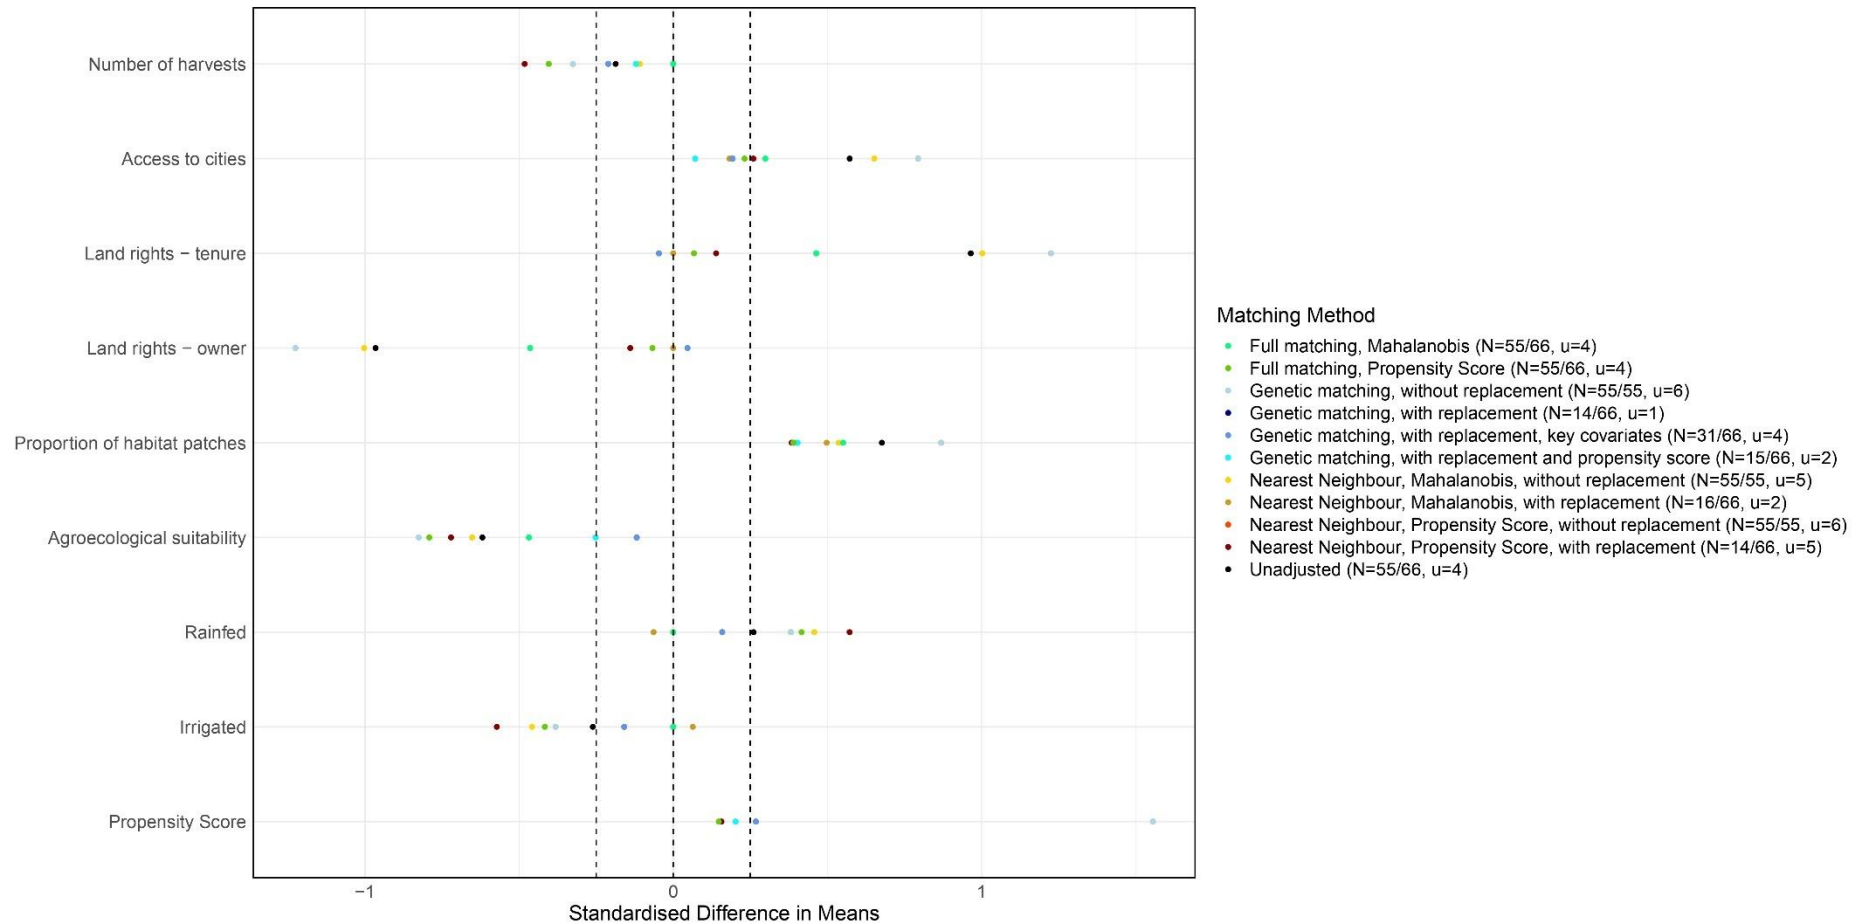

**Figure S4.** Standardised difference in means of matching covariates between ZBNF and agrichemical fields (for the supplementary analysis). The legend describes the different matching runs, with the sample size (N= agrichemical/ZBNF harvests) and the number of covariates with an SDiM > 0.25 (u) in brackets.

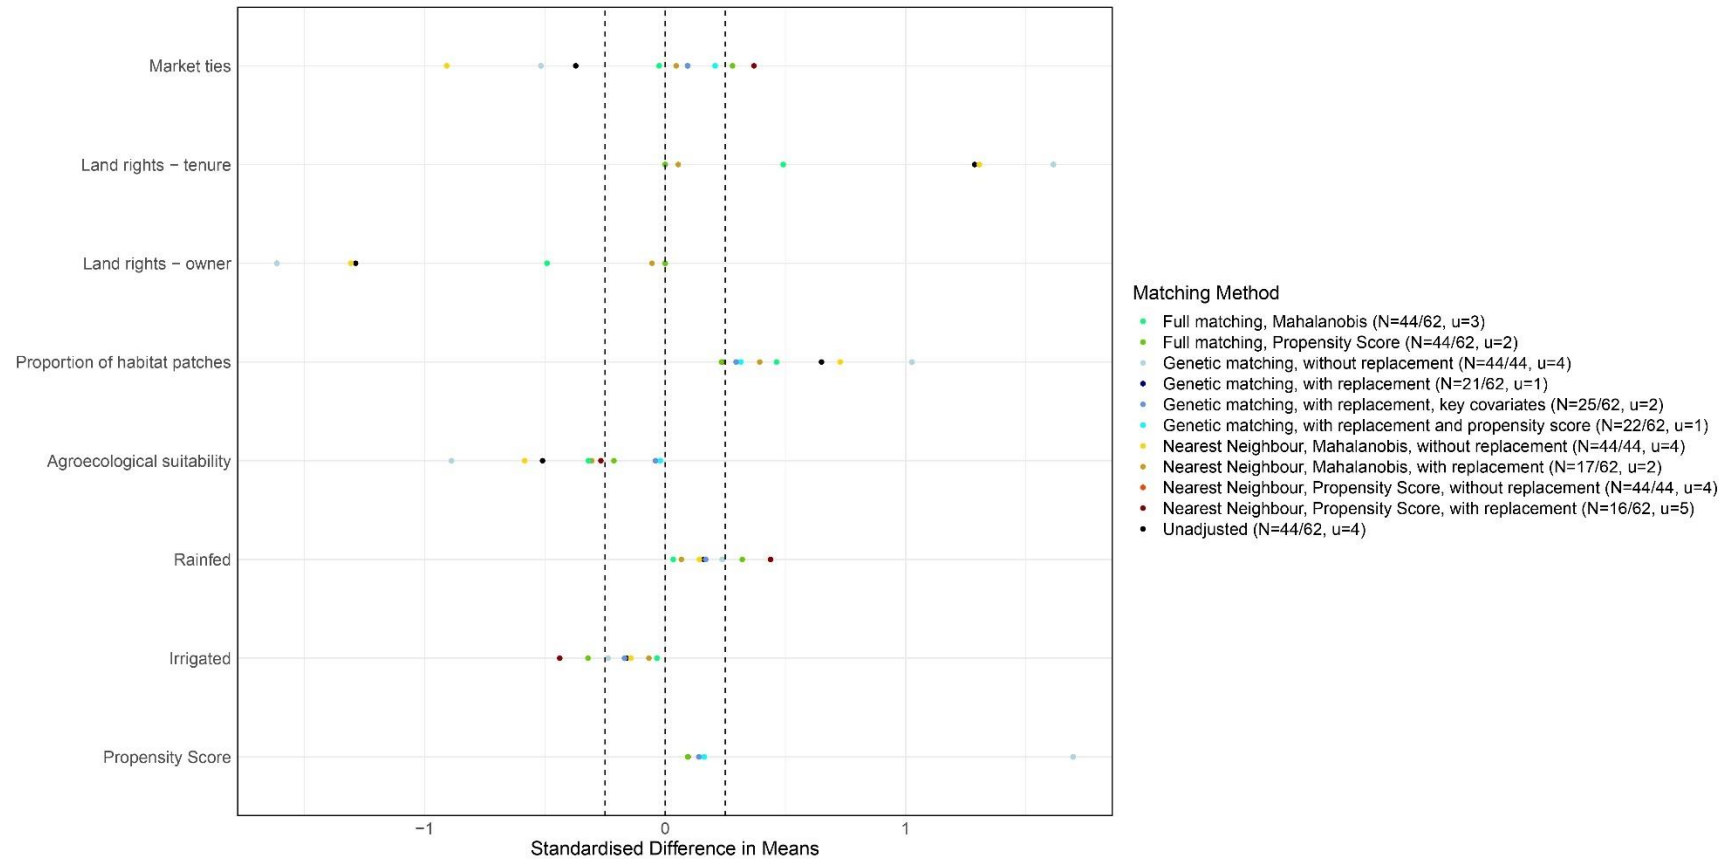

**Figure S5.** Standardised difference in means of matching covariates between ZBNF and agrichemical rice harvests of the main ('kharif') growing season. The legend describes the different matching runs, with the sample size (N= agrichemical/ZBNF harvests) and the number of covariates with an SDiM > 0.25 (u) in brackets.

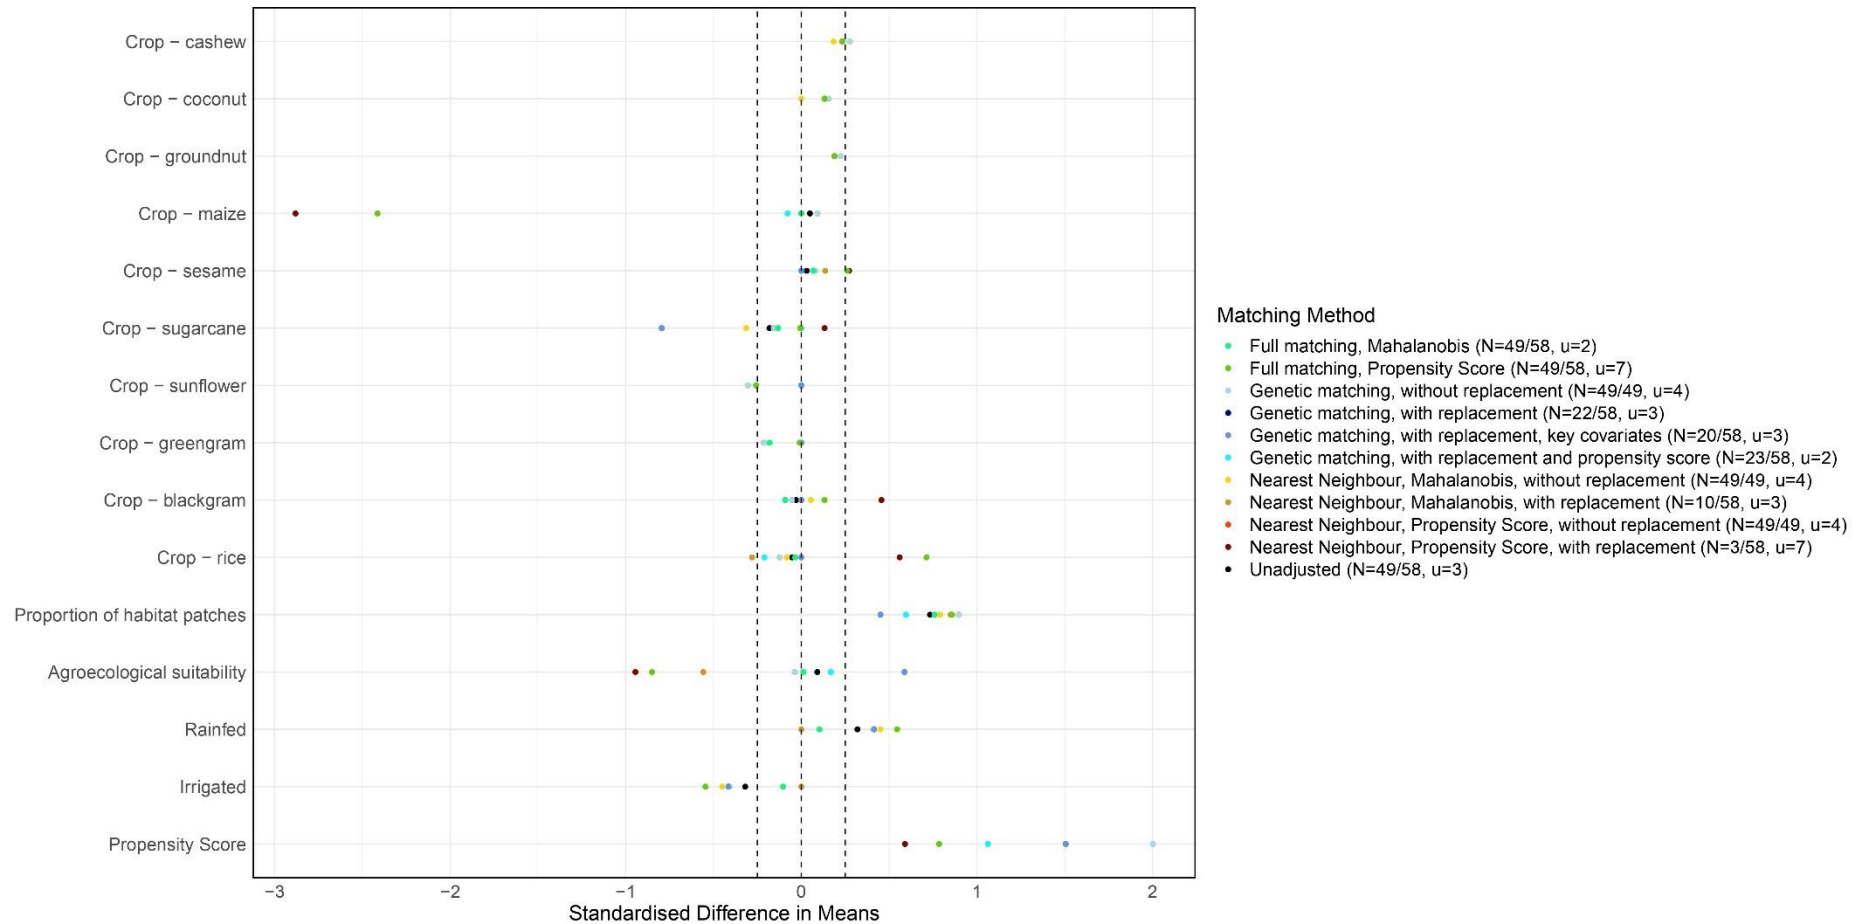

**Figure S6.** Standardised difference in means of matching covariates between ZBNF and agrichemical harvests of the ‘plain’ area only. The legend describes the different matching runs, with the sample size (N= agrichemical/ZBNF harvests) and the number of covariates with an SDiM > 0.25 (u) in brackets.

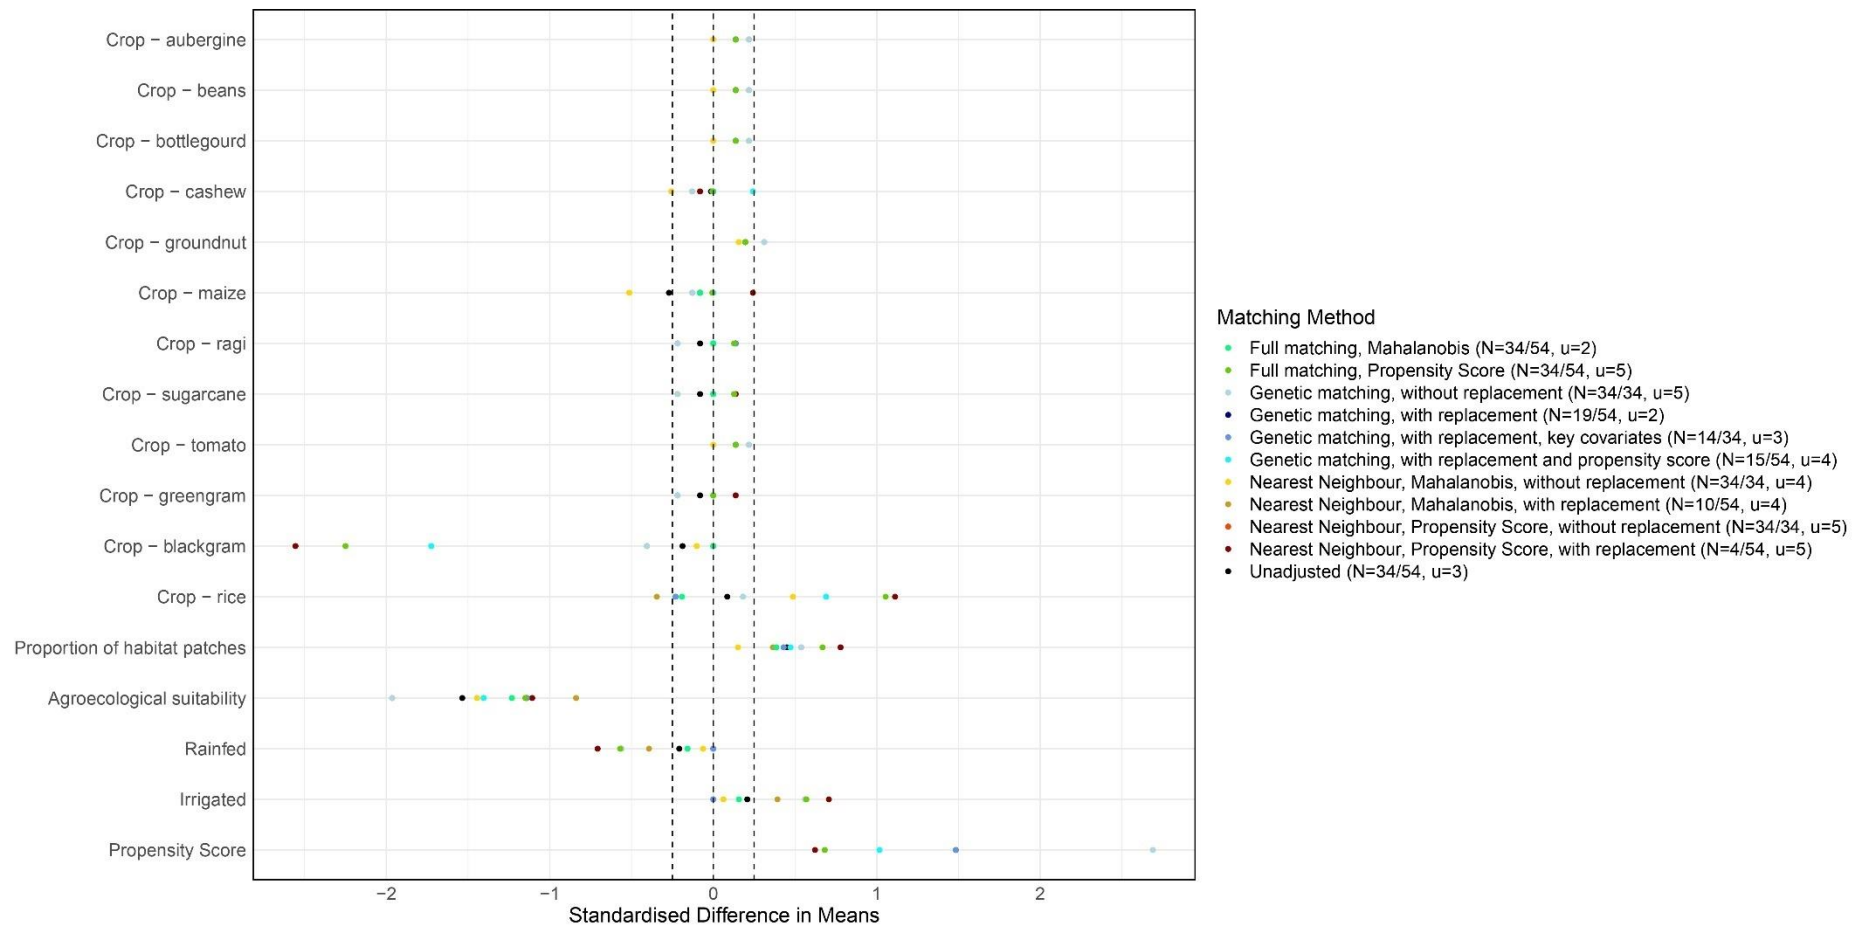

**Figure S7.** Standardised difference in means of matching covariates between ZBNF and agrichemical harvests of the 'tribal' area only. The legend describes the different matching runs, with the sample size (N= agrichemical/ZBNF harvests) and the number of covariates with an SDiM > 0.25 (u) in brackets.



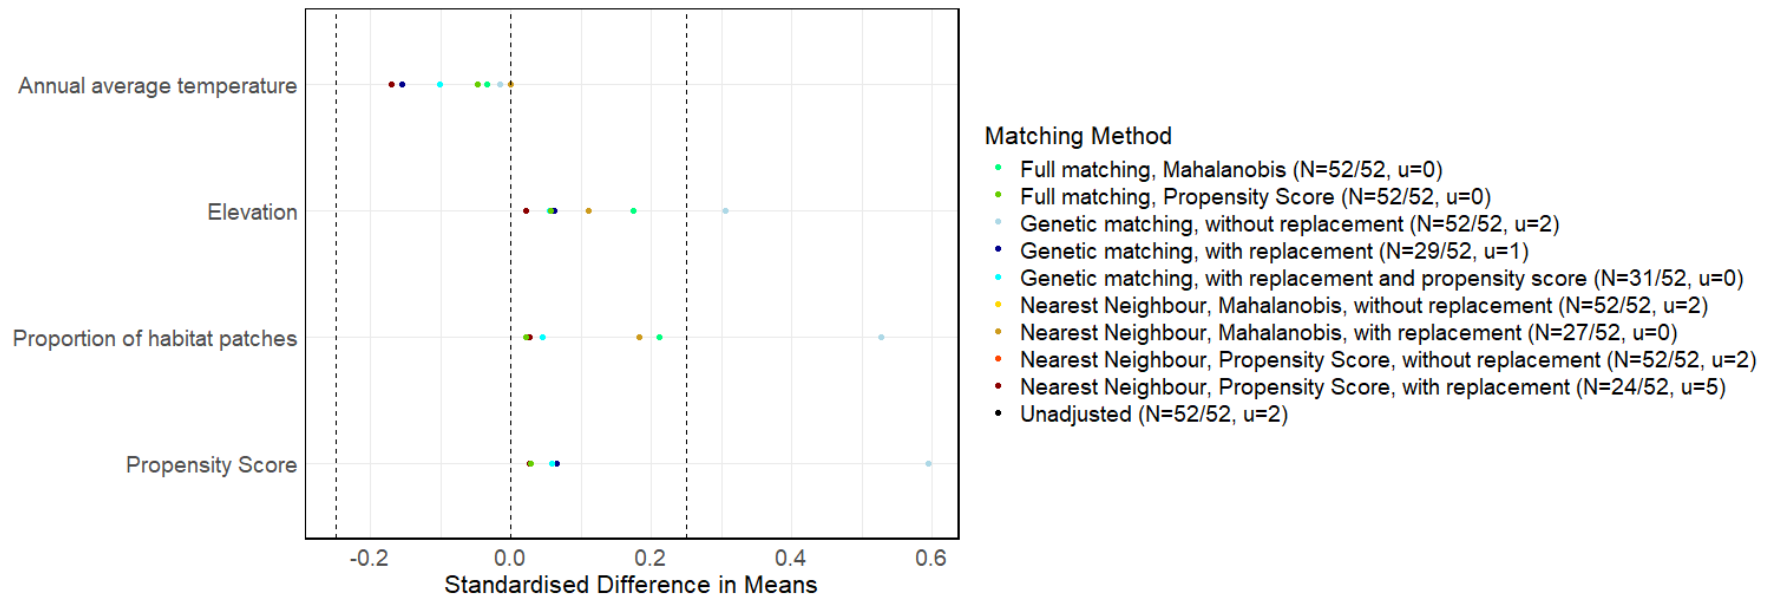

**Figure S8.** Standardised difference in means of matching covariates between ZBNF and agrichemical bird point count locations. The legend describes the different matching runs, with the sample size (N= agrichemical/ZBNF points) and the number of covariates with an SDiM > 0.25 (u) in brackets.

## Supplementary Tables

**Table S1.** Percentage of harvested mass discarded and food energy per crop. Source: USDA (2019). This represents the inedible percentage of the harvest mass as reported by the farmers and thus minor processing may have already occurred for some crops (e.g., farmers report maize harvest as dried maize removed from the cob).

| Crop        | Discarded (%) | Energy (KJ/100g) |
|-------------|---------------|------------------|
| aubergine   | 19            | 104              |
| beans       | 0             | 368              |
| blackgram   | 0             | 1427             |
| bottlegourd | 30            | 59               |
| cashew      | 70            | 2314             |
| coconut     | 48            | 1481             |
| greengram   | 0             | 1452             |
| groundnut   | 30            | 2374             |
| maize       | 0             | 1616             |
| ragi        | 0             | 1582             |
| rice        | 25            | 1506             |
| sesame      | 0             | 2397             |
| sugarcane   | 90            | 1618             |
| sunflower   | 46            | 2445             |
| tapioca     | 14            | 1498             |
| tomato      | 9             | 74               |

**Table S2.** Matching covariates when analysing ZBNF's impact on yield

| Category, reason for inclusion, and variables                                                                                                                                                                                   | Data source                                                                                                                                     | Data type  |
|---------------------------------------------------------------------------------------------------------------------------------------------------------------------------------------------------------------------------------|-------------------------------------------------------------------------------------------------------------------------------------------------|------------|
| <b>Agroecological suitability.</b> A measure of how suitable the land is for agriculture (based on soil, terrain, and climatic conditions). This influences crop yield as well as the management decisions made by the farmers. | Global Agro-Ecological Zones (GAEZ v3.0) (FAO/IIASA, 2012); <a href="https://gaez.fao.org/">https://gaez.fao.org/</a> ; 5 arc-minute resolution | Continuous |

|                                                                                                                                                                                                                                                                                                                                                                                                                                                                                                                                           |                                    |             |
|-------------------------------------------------------------------------------------------------------------------------------------------------------------------------------------------------------------------------------------------------------------------------------------------------------------------------------------------------------------------------------------------------------------------------------------------------------------------------------------------------------------------------------------------|------------------------------------|-------------|
| <b>Proportion of small-scale (semi-)native vegetation cover.</b> The proportion of natural and semi-natural vegetation in agricultural landscapes may affect crop yield via ecosystem service provisioning (e.g., pollination, pest control, water holding capacity, shade) and disservices (e.g., pests). Whilst it is unlikely to affect the likelihood of ZBNF adoption itself, it is likely to be correlated with factors that do so.                                                                                                 | Fieldwork and Google Earth in QGIS | Continuous  |
| <b>Crop type.</b> Some crop types may be perceived as more suitable to be managed under a particular farming system than others either due to the biophysical characteristics of the crop or the intended use. Furthermore, the food energy and (perceived) market value vary between crop types.                                                                                                                                                                                                                                         | Interviews                         | Categorical |
| <b>Travel time to the nearest city of population &gt;50,000.</b> Farmers closer to cities tend to have greater access to markets, technology, agrichemicals, and other resources. For example, farmers in proximity to urban centres are more likely to adopt new farming technologies (Kumar et al., 2020). They also tend to have larger landholdings and greater economic wealth and spending power. These factors influence the probability of adoption of ZBNF, the exact management practices adopted, as well as yield and profit. | Weiss et al., 2018                 | Continuous  |
| <b>Proportion of harvest sold.</b> Agronomic decisions are influenced by whether the crop grown is primarily sold at the market or consumed by the farmers themselves. Time and money invested, the farming practice employed, and yield and profit are all likely to be affected.                                                                                                                                                                                                                                                        | Interviews                         | Continuous  |
| <b>Land rights.</b> Whether the farmer owns the land or is a tenant farmer influences the agroeconomic decisions made, especially with regards to long-term sustainability.                                                                                                                                                                                                                                                                                                                                                               | Interviews                         | Categorical |
| <b>Irrigation.</b> Irrigation affects the crop yield, and it may mediate ZBNF's impact on yield (GIST Impact Report, 2023). It may also affect the likelihood of ZBNF adoption as ZBNF may be perceived as less profitable in irrigated systems.                                                                                                                                                                                                                                                                                          | Interviews                         | Continuous  |

**Table S3.** Matching runs conducted and covariates included in post-matching regression analyses. The main matching run and analyses (i.e., focal analyses of the main text) are shaded in grey.

| Algorithm         | Distance metric  | With replacement | Response variable: yield (GJ acre <sup>-1</sup> )                                                   |                                                                                                     |                                                          | Response variable: profit (INR acre <sup>-1</sup> ) |                                 |                                                          |
|-------------------|------------------|------------------|-----------------------------------------------------------------------------------------------------|-----------------------------------------------------------------------------------------------------|----------------------------------------------------------|-----------------------------------------------------|---------------------------------|----------------------------------------------------------|
|                   |                  |                  | Covariates matched on                                                                               | Covariates optimised balance on                                                                     | Covariates included in post-matching regression analysis | Covariates matched on                               | Covariates optimised balance on | Covariates included in post-matching regression analysis |
| Full matching     | Mahalanobis      | NA               | agroecological suitability, percentage habitat patches, ownership, travel time to a city, crop type | agroecological suitability, percentage habitat patches, ownership, travel time to a city, crop type |                                                          | agroecological suitability                          | agroecological suitability      | None                                                     |
|                   | Propensity Score | NA               | agroecological suitability, percentage habitat patches, ownership, travel time to a city, crop type | agroecological suitability, percentage habitat patches, ownership, travel time to a city, crop type |                                                          | agroecological suitability                          | agroecological suitability      | None                                                     |
| Nearest Neighbour | Mahalanobis      | Y                | agroecological suitability, percentage habitat patches, ownership, travel time to a city, crop type | agroecological suitability, percentage habitat patches, ownership, travel time to a city, crop type | agroecological suitability, habitat patches, irrigation  | agroecological suitability                          | agroecological suitability      |                                                          |
|                   | Mahalanobis      | N                | agroecological suitability, percentage habitat patches, ownership, travel time to a city, crop type | agroecological suitability, percentage habitat patches, ownership, travel time to a city, crop type |                                                          | agroecological suitability                          | agroecological suitability      |                                                          |
|                   | Propensity Score | Y                | agroecological suitability, percentage habitat patches, ownership, travel time to a city, crop type | agroecological suitability, percentage habitat patches, ownership, travel time to a city, crop type |                                                          | agroecological suitability                          | agroecological suitability      |                                                          |

|         |                            |   |                                                                                                                                   |                                                                                                                                         |                 |                               |                            |                               |
|---------|----------------------------|---|-----------------------------------------------------------------------------------------------------------------------------------|-----------------------------------------------------------------------------------------------------------------------------------------|-----------------|-------------------------------|----------------------------|-------------------------------|
|         |                            |   |                                                                                                                                   | travel time to a city,<br>crop type                                                                                                     |                 |                               |                            |                               |
|         | Propensity<br>Score        | N | agroecological suitability,<br>percentage habitat<br>patches, ownership,<br>travel time to a city, crop<br>type                   | agroecological<br>suitability,<br>percentage habitat<br>patches, ownership,<br>travel time to a city,<br>crop type                      |                 | agroecological<br>suitability | agroecological suitability |                               |
| Genetic | Generalised<br>Mahalanobis | N | agroecological suitability,<br>percentage habitat<br>patches, ownership,<br>travel time to a city, crop<br>type                   | agroecological<br>suitability,<br>percentage habitat<br>patches, ownership,<br>travel time to a city,<br>crop type                      |                 | agroecological<br>suitability | agroecological suitability |                               |
|         | Generalised<br>Mahalanobis | Y | agroecological suitability,<br>percentage habitat<br>patches, ownership,<br>travel time to a city, crop<br>type                   | agroecological<br>suitability,<br>percentage habitat<br>patches, ownership,<br>travel time to a city,<br>crop type                      | habitat patches | agroecological<br>suitability | agroecological suitability | agroecological<br>suitability |
|         | Generalised<br>Mahalanobis | Y | agroecological suitability,<br>percentage habitat<br>patches, ownership,<br>travel time to a city, crop<br>type, propensity score | agroecological<br>suitability,<br>percentage habitat<br>patches, ownership,<br>travel time to a city,<br>crop type,<br>propensity score | habitat patches | agroecological<br>suitability | agroecological suitability | agroecological<br>suitability |
|         | Generalised<br>Mahalanobis | Y | agroecological suitability,<br>percentage habitat<br>patches, crop type                                                           | agroecological<br>suitability,<br>percentage habitat<br>patches, ownership,<br>travel time to a city,<br>crop type                      |                 |                               |                            |                               |

**Table S4.** Estimated impact of ZBNF on yield (GJ hectare<sup>-1</sup>). Risk ratios ( $E_{ZBNF} / E_{Agrichemical}$ ) with standard errors in parentheses and bias-corrected accelerated (BCa) bootstrap confidence intervals 95% CI in brackets. The main matching run and analyses (i.e., focal analyses of the main text) is shaded in grey.

| Matching run                                                                   | Main analysis                   | Winter ('kharif') rice harvest only | 'Plain' area only             | 'Tribal' area only           |
|--------------------------------------------------------------------------------|---------------------------------|-------------------------------------|-------------------------------|------------------------------|
| Nearest neighbour matching, Mahalanobis, with replacement                      | 0.994 (0.0360) [0.9407, 1.0885] |                                     |                               |                              |
| Genetic matching, with replacement                                             | 0.969 (0.0521) [0.872, 1.083]   | 1.077 (0.050) [0.958, 1.154]        |                               | 0.849 (0.087) [0.758, 1.096] |
| Genetic matching, with replacement, including propensity score                 | 1.015 (0.0539) [0.944, 1.193]   | 1.098 (0.051) [1.000, 1.191]        | 0.922 (0.0907) [0.837, 1.207] |                              |
| Genetic matching, with replacement, matched on key covariates (balance on all) |                                 | 1.103 (0.067) [0.986, 1.251]        |                               |                              |
| Full matching, Mahalanobis                                                     |                                 |                                     | 1.012 (0.0263) [0.964, 1.066] | 0.887 (0.066) [0.776, 1.049] |
| Full matching, Propensity Score                                                |                                 | 1.038 (0.041) [0.960, 1.113]        |                               |                              |

**Table S5.** Estimated impact of ZBNF on profit (INR hectare<sup>-1</sup>). Risk ratios ( $E_{ZBNF} / E_{Agrichemical}$ ) with standard errors in parentheses and bias-corrected accelerated (BCa) bootstrap confidence intervals 95% CI in brackets. The 'seven matching covariates' analysis was matched on agroecological suitability, the travel time to the nearest city, the percentage of habitat patches, the number of harvests grown per year at the given field, whether at least one of the harvests was irrigated, and ownership status (owner or tenure farmer). The main matching run and analyses (i.e., focal analyses of the main text) is shaded in grey.

| Matching run                                                   | Main analysis                 | Seven matching covariates    |
|----------------------------------------------------------------|-------------------------------|------------------------------|
| Full matching, Mahalanobis                                     | 2.236 (1.757) [1.631, 3.440]  |                              |
| Full matching, Propensity Score                                | 2.683 (1.565) [2.300, 5.097]  |                              |
| Genetic matching, with replacement                             | 2.644 (1.622) [2.135, 5.577]  | 7.981 (1.726) [3.002, 8.293] |
| Genetic matching, with replacement, including propensity score | 2.024 (8.155) [-4.372, 3.750] |                              |

**Table S6. Conservation status, guild, habitat preferences, detection group, and presence in different land systems of all species recorded during the study.** Information on a species' trophic guild and main habitat used by that species were obtained from AVONET (2022). Species regarded as 'of conservation importance' in our study are those with a State of India's Birds (SoIB) priority status of "Moderate" or "High" and/or classified as threatened with extinction under the IUCN Red List ('Near Threatened' or 'Vulnerable'). The group a given species was in to build detection functions is shown, as well as whether a species- or group-level detection function was used to estimate the effective area surveyed (where 'none' indicates that the group-level detection function was used). Whether we recorded a given species in ZBNF, agrichemical, or forest systems respectively is indicated.

| Species                | Trophic guild | Preferred habitat | SoIB priority status | Endemicity          | IUCN category   | Conservation importance | Own detection group    | Detection group           | ZBNF | Chemical | Forest |
|------------------------|---------------|-------------------|----------------------|---------------------|-----------------|-------------------------|------------------------|---------------------------|------|----------|--------|
| Acridotheres_fuscus    | Omnivore      | Woodland          | Low                  | Non-endemic         | Least Concern   | no                      | none                   | myna                      | no   | no       | yes    |
| Acridotheres_gingianus | Omnivore      | Grassland         | High                 | Indian Subcontinent | Least Concern   | yes                     | none                   | myna                      | yes  | no       | no     |
| Acridotheres_tristis   | Omnivore      | Human Modified    | Low                  | Non-endemic         | Least Concern   | no                      | Acridotheres_tristis   | myna                      | yes  | yes      | no     |
| Acrocephalus_dumetorum | Invertivore   | Wetland           | Low                  | Non-endemic         | Least Concern   | no                      | Acrocephalus_dumetorum | warbler                   | yes  | yes      | yes    |
| Actitis_hypoleucos     | Vertivore     | Wetland           | Moderate             | Non-endemic         | Least Concern   | yes                     | none                   | small_wader_lapwing       | yes  | yes      | no     |
| Aegithina_tiphia       | Invertivore   | Forest            | Low                  | Non-endemic         | Least Concern   | no                      | Aegithina_tiphia       | arboreal_invertivore      | no   | yes      | yes    |
| Aethopyga_siparaja     | Nectarivore   | Forest            | Low                  | Non-endemic         | Least Concern   | no                      | none                   | sunbirds                  | no   | no       | yes    |
| Alauda_gulgula         | Omnivore      | Grassland         | High                 | Non-endemic         | Least Concern   | yes                     | Alauda_gulgula         | ground_feeding_passerines | yes  | yes      | no     |
| Alcedo_atthis          | Vertivore     | Riverine          | Low                  | Non-endemic         | Least Concern   | no                      | none                   | kingfisher                | yes  | yes      | no     |
| Alcedo_hercules        | Vertivore     | Riverine          | Moderate             | Non-endemic         | Near Threatened | yes                     | none                   | kingfisher                | yes  | no       | yes    |
| Alcippe_poiocephala    | Invertivore   | Forest            | Moderate             | Non-endemic         | Least Concern   | yes                     | Alcippe_poiocephala    | babbler                   | no   | no       | yes    |
| Alexandrinus_krameri   | Omnivore      | Forest            | Low                  | Non-endemic         | Least Concern   | no                      | Alexandrinus_krameri   | parakeet                  | yes  | yes      | yes    |
| Amandava_amandava      | Granivore     | Shrubland         | Low                  | Non-endemic         | Least Concern   | no                      | none                   | ground_feeding_passerines | no   | yes      | no     |
| Amaurornis_phoenicurus | Vertivore     | Wetland           | Low                  | Non-endemic         | Least Concern   | no                      | none                   | large_wader               | yes  | yes      | no     |
| Ammomanes_phoenicura   | Omnivore      | Grassland         | High                 | Indian Subcontinent | Least Concern   | yes                     | none                   | ground_feeding_passerines | yes  | yes      | no     |
| Anastomus_oscitans     | Vertivore     | Wetland           | Low                  | Non-endemic         | Least Concern   | no                      | none                   | large_wader               | yes  | yes      | no     |
| Anhinga_melanogaster   | Vertivore     | Wetland           | Low                  | Non-endemic         | Near Threatened | yes                     | none                   | large_wader               | yes  | no       | no     |

|                          |             |                |          |                     |                 |     |                       |                           |     |     |     |
|--------------------------|-------------|----------------|----------|---------------------|-----------------|-----|-----------------------|---------------------------|-----|-----|-----|
| Anthracoceros_coronatus  | Frugivore   | Forest         | Moderate | Indian Subcontinent | Near Threatened | yes | none                  | arboreal_frugivore        | no  | no  | yes |
| Anthus_godlewskii        | Invertivore | Rock           | Low      | Non-endemic         | Least Concern   | no  | none                  | pipit                     | yes | yes | no  |
| Anthus_rufulus           | Invertivore | Grassland      | Low      | Non-endemic         | Least Concern   | no  | Anthus_rufulus        | pipit                     | yes | yes | no  |
| Arachnothera_longirostra | Nectarivore | Forest         | Moderate | Non-endemic         | Least Concern   | yes | none                  | sunbirds                  | no  | no  | yes |
| Ardea_alba               | Vertivore   | Wetland        | Low      | Non-endemic         | Least Concern   | no  | none                  | large_wader               | yes | yes | no  |
| Ardea_cinerea            | Vertivore   | Wetland        | Low      | Non-endemic         | Least Concern   | no  | none                  | large_wader               | yes | no  | no  |
| Ardea_intermedia         | Vertivore   | Wetland        | Low      | Non-endemic         | Least Concern   | no  | none                  | large_wader               | yes | yes | no  |
| Ardea_purpurea           | Vertivore   | Wetland        | Low      | Non-endemic         | Least Concern   | no  | none                  | large_wader               | yes | yes | no  |
| Ardeola_grayii           | Vertivore   | Wetland        | Low      | Non-endemic         | Least Concern   | no  | Ardeola_grayii        | large_wader               | yes | yes | no  |
| Argya_affinis            | Invertivore | NA             | Low      | Indian Subcontinent | Least Concern   | no  | none                  | babbler                   | yes | yes | yes |
| Argya_caudata            | Omnivore    | Shrubland      | Moderate | Indian Subcontinent | Least Concern   | yes | none                  | babbler                   | yes | yes | no  |
| Argya_striata            | Invertivore | NA             | Low      | Indian Subcontinent | Least Concern   | no  | Argya_striata         | babbler                   | yes | yes | yes |
| Athene_brama             | Invertivore | Human Modified | Low      | Non-endemic         | Least Concern   | no  | none                  | arboreal_invertivore      | yes | yes | yes |
| Bubulcus_ibis            | Omnivore    | Human Modified | Low      | Non-endemic         | Least Concern   | no  | Bubulcus_ibis         | large_wader               | yes | yes | no  |
| Cacomantis_merulinus     | Invertivore | Woodland       | Low      | Non-endemic         | Least Concern   | no  | none                  | arboreal_invertivore      | yes | no  | no  |
| Cacomantis_passerinus    | Invertivore | Woodland       | Low      | Indian Subcontinent | Least Concern   | no  | none                  | arboreal_invertivore      | no  | no  | yes |
| Cacomantis_sonneratii    | Invertivore | Forest         | Moderate | Non-endemic         | Least Concern   | yes | Cacomantis_sonneratii | arboreal_invertivore      | no  | no  | yes |
| Calandrella_dukhunensis  | Omnivore    | Grassland      | Low      | Non-endemic         | Least Concern   | no  | none                  | ground_feeding_passerines | yes | yes | no  |
| Calidris_minuta          | Vertivore   | Grassland      | High     | Non-endemic         | Least Concern   | yes | none                  | small_wader_lapwing       | yes | yes | no  |
| Caprimulgus_asiaticus    | Invertivore | Shrubland      | Low      | Non-endemic         | Least Concern   | no  | none                  | arboreal_invertivore      | no  | no  | yes |
| Caprimulgus_atripennis   | Invertivore | Forest         | Low      | Indian Subcontinent | Least Concern   | no  | none                  | arboreal_invertivore      | no  | no  | yes |
| Centropus_sinensis       | Vertivore   | Woodland       | Low      | Non-endemic         | Least Concern   | no  | Centropus_sinensis    | ground_dweller_large      | yes | yes | yes |
| Ceryle_rudis             | Vertivore   | Wetland        | Moderate | Non-endemic         | Least Concern   | yes | none                  | kingfisher                | yes | yes | yes |



|                               |             |                |          |                     |               |     |                       |                           |     |     |     |
|-------------------------------|-------------|----------------|----------|---------------------|---------------|-----|-----------------------|---------------------------|-----|-----|-----|
| Chalcophaps_indica            | Omnivore    | Forest         | Low      | Non-endemic         | Least Concern | no  | none                  | doves                     | no  | no  | yes |
| Charadrius_dubius             | Vertivore   | Wetland        | High     | Non-endemic         | Least Concern | yes | none                  | small_wader_lapwing       | yes | no  | no  |
| Chloropsis_aurifrons          | Omnivore    | Forest         | Low      | Non-endemic         | Least Concern | no  | Chloropsis_aurifrons  | arboreal_invertivore      | no  | no  | yes |
| Chloropsis_jerdoni            | Omnivore    | Forest         | Low      | Indian Subcontinent | Least Concern | no  | Chloropsis_jerdoni    | leafbird                  | yes | yes | yes |
| Chrysocolaptes_festivus       | Invertivore | Woodland       | Moderate | Indian Subcontinent | Least Concern | yes | none                  | woodpecker                | no  | no  | yes |
| Chrysocolaptes_guttacristatus | Invertivore | Woodland       | Low      | Non-endemic         | Least Concern | no  | none                  | woodpecker                | yes | yes | yes |
| Chrysocolaptes_lucidus        | Invertivore | Forest         | Low      | Non-endemic         | Least Concern | no  | none                  | woodpecker                | no  | no  | yes |
| Cinnyris_asiaticus            | Omnivore    | Shrubland      | Low      | Non-endemic         | Least Concern | no  | Cinnyris_asiaticus    | sunbirds                  | yes | yes | yes |
| Cinnyris_lotenius             | Nectarivore | Forest         | Low      | Indian Subcontinent | Least Concern | no  | none                  | sunbirds                  | no  | no  | yes |
| Cisticola_juncidis            | Invertivore | Grassland      | Low      | Non-endemic         | Least Concern | no  | none                  | warblers                  | yes | no  | no  |
| Clamator_jacobinus            | Invertivore | Grassland      | Low      | Non-endemic         | Least Concern | no  | none                  | arboreal_invertivore      | no  | no  | yes |
| Columba_livia                 | Granivore   | Human Modified | Low      | Non-endemic         | Least Concern | no  | none                  | doves                     | yes | yes | yes |
| Columba_punicea               | Frugivore   | Forest         | High     | Non-endemic         | Vulnerable    | yes | none                  | doves                     | no  | no  | yes |
| Copsychus_malabaricus         | Invertivore | Forest         | Low      | Non-endemic         | Least Concern | no  | none                  | flycatcher                | no  | no  | yes |
| Copsychus_saularis            | Invertivore | Woodland       | Low      | Non-endemic         | Least Concern | no  | Copsychus_saularis    | thrush                    | yes | yes | yes |
| Coracias_benghalensis         | Omnivore    | Human Modified | Moderate | Non-endemic         | Least Concern | yes | Coracias_benghalensis | roller_weaver             | yes | yes | no  |
| Coracina_macei                | Invertivore | Forest         | Moderate | Non-endemic         | Least Concern | yes | none                  | arboreal_invertivore      | yes | no  | yes |
| Corvus_macrorhynchos          | Omnivore    | Woodland       | Low      | Non-endemic         | Least Concern | no  | Corvus_macrorhynchos  | crow                      | yes | yes | yes |
| Corvus_splendens              | Omnivore    | Human Modified | Low      | Non-endemic         | Least Concern | no  | none                  | crow                      | yes | yes | yes |
| Culicicapa_ceylonensis        | Invertivore | Woodland       | Moderate | Non-endemic         | Least Concern | yes | none                  | flycatcher                | no  | no  | yes |
| Cyornis_tickelliae            | Invertivore | Forest         | Low      | Indian Subcontinent | Least Concern | no  | Cyornis_tickelliae    | flycatcher                | yes | no  | yes |
| Dendrocopos_macei             | Invertivore | Forest         | Low      | Non-endemic         | Least Concern | no  | none                  | woodpecker                | no  | no  | yes |
| Dendronanthus_indicus         | Invertivore | Forest         | High     | Non-endemic         | Least Concern | yes | none                  | ground_feeding_passerines | no  | no  | yes |

|                         |             |           |          |                     |                 |     |                         |                           |     |     |     |
|-------------------------|-------------|-----------|----------|---------------------|-----------------|-----|-------------------------|---------------------------|-----|-----|-----|
| Dicaeum_agile           | Frugivore   | Forest    | High     | Non-endemic         | Least Concern   | yes | Dicaeum_agile           | arboreal_frugivore        | no  | no  | yes |
| Dicaeum_erythrorhynchos | Frugivore   | Forest    | Low      | Indian Subcontinent | Least Concern   | no  | Dicaeum_erythrorhynchos | arboreal_frugivore        | no  | no  | yes |
| Dicrurus_aeneus         | Invertivore | Forest    | Low      | Non-endemic         | Least Concern   | no  | Dicrurus_aeneus         | arboreal_invertivore      | no  | no  | yes |
| Dicrurus_caerulescens   | Invertivore | Forest    | Moderate | Indian Subcontinent | Least Concern   | yes | none                    | arboreal_invertivore      | yes | yes | yes |
| Dicrurus_leucophaeus    | Invertivore | Forest    | Low      | Non-endemic         | Least Concern   | no  | none                    | arboreal_invertivore      | yes | no  | yes |
| Dicrurus_macrocerus     | Invertivore | Shrubland | Low      | Non-endemic         | Least Concern   | no  | Dicrurus_macrocerus     | arboreal_invertivore      | yes | yes | yes |
| Dicrurus_paradiseus     | Invertivore | Forest    | Low      | Non-endemic         | Least Concern   | no  | none                    | arboreal_invertivore      | yes | no  | yes |
| Dinopium_benghalense    | Invertivore | Woodland  | Low      | Indian Subcontinent | Least Concern   | no  | Dinopium_benghalense    | woodpecker                | yes | yes | yes |
| Dryocopus_javensis      | Invertivore | Forest    | Moderate | Non-endemic         | Least Concern   | yes | none                    | woodpecker                | no  | no  | yes |
| Ducula_aenea            | Frugivore   | Forest    | Low      | Non-endemic         | Near Threatened | yes | none                    | doves                     | no  | no  | yes |
| Dumetia_hyperythra      | Invertivore | Grassland | Low      | Indian Subcontinent | Least Concern   | no  | none                    | babbler                   | no  | no  | yes |
| Egretta_garzetta        | Vertivore   | Wetland   | Low      | Non-endemic         | Least Concern   | no  | none                    | large_wader               | yes | yes | no  |
| Eremopterix_griseus     | Granivore   | Shrubland | Moderate | Indian Subcontinent | Least Concern   | yes | none                    | ground_feeding_passerines | yes | yes | yes |
| Eudynamys_scolopaceus   | Frugivore   | Woodland  | Low      | Non-endemic         | Least Concern   | no  | none                    | arboreal_invertivore      | yes | yes | yes |
| Euodice_malabarica      | Granivore   | Grassland | Low      | Non-endemic         | Least Concern   | no  | none                    | ground_feeding_passerines | yes | yes | no  |
| Ficedula_superciliaris  | Invertivore | Forest    | Low      | Non-endemic         | Least Concern   | no  | none                    | flycatcher                | no  | no  | yes |
| Galloperdix_spadicea    | Omnivore    | Shrubland | Low      | Mainland India      | Least Concern   | no  | none                    | ground_dweller_large      | no  | no  | yes |
| Gallus_gallus           | Omnivore    | Forest    | Low      | Non-endemic         | Least Concern   | no  | Gallus_gallus           | ground_dweller_large      | no  | no  | yes |
| Gallus_sonneratii       | Omnivore    | Forest    | Low      | Mainland India      | Least Concern   | no  | none                    | ground_dweller_large      | no  | no  | yes |
| Geokichla_citrina       | Omnivore    | Forest    | Moderate | Non-endemic         | Least Concern   | yes | none                    | ground_feeding_passerines | no  | no  | yes |
| Glareola_maldivarum     | Invertivore | Grassland | Low      | Non-endemic         | Least Concern   | no  | none                    | small_wader_lapwing       | no  | yes | no  |
| Glaucidium_radiatum     | Invertivore | Woodland  | Low      | Indian Subcontinent | Least Concern   | no  | none                    | arboreal_invertivore      | yes | yes | yes |
| Gracula religiosa       | Frugivore   | Forest    | Low      | Non-endemic         | Least Concern   | no  | none                    | myna                      | no  | no  | yes |

|                             |             |                |          |                     |               |     |                        |                           |     |     |     |
|-----------------------------|-------------|----------------|----------|---------------------|---------------|-----|------------------------|---------------------------|-----|-----|-----|
| Gracupica_contra            | Omnivore    | Shrubland      | Low      | Non-endemic         | Least Concern | no  | none                   | myna                      | yes | yes | no  |
| Gymnoris_xanthocollis       | Granivore   | Forest         | Low      | Non-endemic         | Least Concern | no  | none                   | ground_feeding_passerines | no  | no  | yes |
| Halcyon_smyrnensis          | Omnivore    | Human Modified | Low      | Non-endemic         | Least Concern | no  | Halcyon_smyrnensis     | kingfisher                | yes | yes | yes |
| Harpactes_fasciatus         | Invertivore | Forest         | Moderate | Indian Subcontinent | Least Concern | yes | none                   | arboreal_invertivore      | no  | no  | yes |
| Hemicircus_canente          | Invertivore | Forest         | Moderate | Non-endemic         | Least Concern | yes | none                   | woodpecker                | no  | no  | yes |
| Hemipus_picatus             | Invertivore | Shrubland      | Low      | Non-endemic         | Least Concern | no  | none                   | flycatcher                | no  | no  | yes |
| Hierococcyx_varius          | Invertivore | Woodland       | Low      | Indian Subcontinent | Least Concern | no  | none                   | arboreal_invertivore      | yes | yes | yes |
| Himalayapsitta_cyanocephala | Frugivore   | Forest         | Low      | Indian Subcontinent | Least Concern | no  | none                   | parakeet                  | no  | no  | yes |
| Himantopus_himantopus       | Vertivore   | Wetland        | Low      | Non-endemic         | Least Concern | no  | none                   | small_wader_lapwing       | yes | no  | no  |
| Hydrophasianus_chirurgus    | Vertivore   | Wetland        | Moderate | Non-endemic         | Least Concern | yes | none                   | small_wader_lapwing       | yes | no  | no  |
| Hypothymis_azurea           | Invertivore | Forest         | Low      | Non-endemic         | Least Concern | no  | Hypothymis_azurea      | flycatcher                | no  | no  | yes |
| Iduna_caligata              | Invertivore | Shrubland      | Low      | Non-endemic         | Least Concern | no  | none                   | warblers                  | yes | yes | yes |
| Irena_puella                | Frugivore   | Forest         | Moderate | Non-endemic         | Least Concern | yes | none                   | arboreal_frugivore        | no  | no  | yes |
| Ixobrychus_cinnamomeus      | Vertivore   | Human Modified | Low      | Non-endemic         | Least Concern | no  | none                   | large_wader               | yes | no  | no  |
| Ketupa_zeylonensis          | Vertivore   | Riverine       | Moderate | Non-endemic         | Least Concern | yes | none                   | arboreal_invertivore      | no  | no  | yes |
| Kittacincla_malabarica      | Invertivore | Forest         | Low      | Non-endemic         | Least Concern | no  | Kittacincla_malabarica | ground_feeding_passerines | no  | no  | yes |
| Lalage_melanoptera          | Invertivore | Forest         | Low      | Indian Subcontinent | Least Concern | no  | none                   | arboreal_invertivore      | no  | no  | yes |
| Lanius_vittatus             | Invertivore | Shrubland      | Low      | Non-endemic         | Least Concern | no  | none                   | arboreal_invertivore      | yes | no  | no  |
| Larvivora_brunnea           | Invertivore | Shrubland      | Moderate | Non-endemic         | Least Concern | yes | none                   | ground_feeding_passerines | no  | no  | yes |
| Leiopicus_mahrattensis      | Invertivore | Woodland       | High     | Non-endemic         | Least Concern | yes | none                   | woodpecker                | no  | no  | yes |
| Leptocoma_zeylonica         | Omnivore    | Forest         | Low      | Indian Subcontinent | Least Concern | no  | Leptocoma_zeylonica    | sunbirds                  | yes | yes | yes |
| Lonchura_atricapilla        | Granivore   | Wetland        | Low      | Non-endemic         | Least Concern | no  | none                   | ground_feeding_passerines | no  | yes | no  |
| Lonchura_kelaarti           | Granivore   | Shrubland      | Low      | Indian Subcontinent | Least Concern | no  | none                   | ground_feeding_passerines | no  | no  | yes |

|                           |             |                |          |                     |                 |     |                         |                           |     |     |     |
|---------------------------|-------------|----------------|----------|---------------------|-----------------|-----|-------------------------|---------------------------|-----|-----|-----|
| Lonchura_malacca          | Granivore   | Wetland        | Low      | Indian Subcontinent | Least Concern   | no  | none                    | ground_feeding_passerines | no  | yes | yes |
| Lonchura_punctulata       | Granivore   | Grassland      | Low      | Non-endemic         | Least Concern   | no  | none                    | ground_feeding_passerines | yes | yes | yes |
| Lonchura_striata          | Granivore   | Shrubland      | Low      | Non-endemic         | Least Concern   | no  | none                    | ground_feeding_passerines | yes | yes | yes |
| Loriculus_venalis         | Frugivore   | Forest         | Low      | Non-endemic         | Least Concern   | no  | Loriculus_venalis       | parakeet                  | yes | no  | yes |
| Macholophus_xanthogenys   | Invertivore | Forest         | Low      | Himalayas           | Least Concern   | no  | Macholophus_xanthogenys | arboreal_invertivore      | yes | no  | yes |
| Merops_leschenaulti       | Invertivore | Woodland       | Low      | Non-endemic         | Least Concern   | no  | none                    | arboreal_invertivore      | yes | yes | yes |
| Merops_orientalis         | Invertivore | Shrubland      | Low      | Non-endemic         | Least Concern   | no  | none                    | arboreal_invertivore      | yes | yes | yes |
| Merops_philippinus        | Invertivore | Wetland        | Low      | Non-endemic         | Least Concern   | no  | none                    | arboreal_invertivore      | yes | yes | yes |
| Microcarbo_niger          | Vertivore   | Wetland        | Low      | Non-endemic         | Least Concern   | no  | none                    | large_wader               | yes | yes | no  |
| Micropternus_brachyurus   | Invertivore | Forest         | Low      | Non-endemic         | Least Concern   | no  | none                    | woodpecker                | no  | no  | yes |
| Mirafra_affinis           | Omnivore    | Grassland      | Low      | Indian Subcontinent | Least Concern   | no  | none                    | ground_feeding_passerines | yes | yes | no  |
| Mirafra_erythroptera      | Omnivore    | Shrubland      | Moderate | Indian Subcontinent | Least Concern   | yes | none                    | ground_feeding_passerines | yes | yes | no  |
| Mixornis_gularis          | Invertivore | Forest         | Low      | Non-endemic         | Least Concern   | no  | Mixornis_gularis        | babbler                   | yes | no  | yes |
| Monticola_cinclorhyncha   | Invertivore | Forest         | High     | Non-endemic         | Least Concern   | yes | none                    | ground_feeding_passerines | no  | no  | yes |
| Monticola_solitarius      | Omnivore    | Rock           | High     | Non-endemic         | Least Concern   | yes | none                    | ground_feeding_passerines | no  | no  | yes |
| Motacilla_alba            | Invertivore | Human Modified | Moderate | Non-endemic         | Least Concern   | yes | none                    | ground_feeding_passerines | no  | no  | yes |
| Motacilla_cinerea         | Invertivore | Riverine       | Moderate | Non-endemic         | Least Concern   | yes | none                    | ground_feeding_passerines | yes | yes | yes |
| Motacilla_flava           | Invertivore | Grassland      | Moderate | Non-endemic         | Least Concern   | yes | none                    | ground_feeding_passerines | no  | no  | yes |
| Motacilla_maderaspatensis | Invertivore | Riverine       | Low      | Indian Subcontinent | Least Concern   | no  | none                    | ground_feeding_passerines | yes | no  | yes |
| Muscicapa_daurica         | Invertivore | Woodland       | Low      | Non-endemic         | Least Concern   | no  | none                    | flycatcher                | no  | no  | yes |
| Mycteria_leucocephala     | Vertivore   | Wetland        | Low      | Non-endemic         | Near Threatened | yes | none                    | large_wader               | yes | no  | no  |
| Ninox_scutulata           | Invertivore | Forest         | Low      | Non-endemic         | Least Concern   | no  | none                    | arboreal_invertivore      | no  | no  | yes |
| Nyctornis_athertoni       | Invertivore | Forest         | Low      | Non-endemic         | Least Concern   | no  | none                    | arboreal_invertivore      | no  | no  | yes |

|                           |             |                |          |                     |                 |     |                           |                           |     |     |     |
|---------------------------|-------------|----------------|----------|---------------------|-----------------|-----|---------------------------|---------------------------|-----|-----|-----|
| Ocyrceros_birostris       | Frugivore   | Woodland       | Low      | Indian Subcontinent | Least Concern   | no  | none                      | arboreal_frugivore        | yes | no  | yes |
| Oriolus_kundoo            | Omnivore    | Woodland       | Low      | Non-endemic         | Least Concern   | no  | none                      | arboreal_invertivore      | yes | yes | yes |
| Oriolus_xanthornus        | Frugivore   | Forest         | Low      | Non-endemic         | Least Concern   | no  | Oriolus_xanthornus        | oriole                    | yes | yes | yes |
| Orthotomus_sutorius       | Invertivore | Shrubland      | Low      | Non-endemic         | Least Concern   | no  | Orthotomus_sutorius       | flycatcher                | yes | yes | yes |
| Ortygornis_pondicerianus  | Omnivore    | NA             | Low      | Non-endemic         | Least Concern   | no  | none                      | ground_dweller_large      | yes | yes | no  |
| Palaeornis_eupatria       | Omnivore    | Forest         | Low      | Non-endemic         | Near Threatened | yes | none                      | parakeet                  | yes | yes | yes |
| Parus_cinereus            | Invertivore | Forest         | Low      | Non-endemic         | Least Concern   | no  | none                      | arboreal_invertivore      | no  | no  | yes |
| Parus_major               | Invertivore | Woodland       | Low      | Non-endemic         | Least Concern   | no  | Parus_major               | arboreal_invertivore      | no  | no  | yes |
| Passer_domesticus         | Granivore   | Human Modified | Moderate | Non-endemic         | Least Concern   | yes | none                      | ground_feeding_passerines | no  | no  | yes |
| Pavo_cristatus            | Omnivore    | Forest         | Low      | Indian Subcontinent | Least Concern   | no  | none                      | ground_dweller_large      | no  | no  | yes |
| Pellorneum_ruficeps       | Invertivore | Shrubland      | Low      | Non-endemic         | Least Concern   | no  | Pellorneum_ruficeps       | babbler                   | no  | no  | yes |
| Pericrocotus_cinnamomeus  | Invertivore | Shrubland      | Low      | Non-endemic         | Least Concern   | no  | Pericrocotus_cinnamomeus  | arboreal_invertivore      | no  | no  | yes |
| Pericrocotus_flammeus     | Invertivore | Forest         | Moderate | Indian Subcontinent | Least Concern   | yes | Pericrocotus_flammeus     | arboreal_invertivore      | no  | no  | yes |
| Phaenicophaeus_tristis    | Invertivore | Forest         | Low      | Non-endemic         | Least Concern   | no  | none                      | arboreal_invertivore      | no  | no  | yes |
| Phylloscopus_humei        | Invertivore | Forest         | Low      | Non-endemic         | Least Concern   | no  | none                      | warblers                  | no  | no  | yes |
| Phylloscopus_inornatus    | Invertivore | Woodland       | Low      | Non-endemic         | Least Concern   | no  | none                      | warblers                  | no  | no  | yes |
| Phylloscopus_magnirostris | Invertivore | Forest         | Moderate | Non-endemic         | Least Concern   | yes | none                      | warblers                  | no  | no  | yes |
| Phylloscopus_nitidus      | Invertivore | Forest         | Low      | Non-endemic         | Least Concern   | no  | none                      | warblers                  | no  | no  | yes |
| Phylloscopus_trochiloides | Invertivore | Forest         | Low      | Non-endemic         | Least Concern   | no  | Phylloscopus_trochiloides | warbler                   | yes | no  | yes |
| Picoides_nanus            | Invertivore | Woodland       | Moderate | Indian Subcontinent | Least Concern   | yes | none                      | woodpecker                | no  | no  | yes |
| Picumnus_innominatus      | Invertivore | Forest         | Low      | Non-endemic         | Least Concern   | no  | none                      | woodpecker                | no  | no  | yes |
| Picus_canus               | Invertivore | Forest         | Low      | Non-endemic         | Least Concern   | no  | none                      | woodpecker                | no  | no  | yes |
| Picus_chlorolophus        | Invertivore | Forest         | Low      | Non-endemic         | Least Concern   | no  | none                      | woodpecker                | no  | no  | yes |

|                          |             |           |          |                         |               |     |                          |                           |     |     |     |
|--------------------------|-------------|-----------|----------|-------------------------|---------------|-----|--------------------------|---------------------------|-----|-----|-----|
| Picus_xanthopygaeus      | Invertivore | Woodland  | Low      | Non-endemic             | Least Concern | no  | none                     | woodpecker                | no  | no  | yes |
| Ploceus_philippinus      | Granivore   | Shrubland | Low      | Non-endemic             | Least Concern | no  | none                     | roller_weaver             | yes | yes | no  |
| Pomatorhinus_horsfieldii | Invertivore | Forest    | Low      | Mainland India          | Least Concern | no  | Pomatorhinus_horsfieldii | babbler                   | no  | no  | yes |
| Prinia_inornata          | Invertivore | Shrubland | Low      | Non-endemic             | Least Concern | no  | none                     | warblers                  | yes | yes | no  |
| Prinia_socialis          | Invertivore | Grassland | Low      | Indian Subcontinent     | Least Concern | no  | Prinia_socialis          | warblers                  | yes | yes | yes |
| Prinia_sylvatica         | Invertivore | Shrubland | Low      | Indian Subcontinent     | Least Concern | no  | none                     | warblers                  | yes | no  | yes |
| Psilopogon_haemacephalus | Frugivore   | Woodland  | Low      | Non-endemic             | Least Concern | no  | Psilopogon_haemacephalus | barbet                    | yes | yes | yes |
| Psilopogon_lineatus      | Frugivore   | Forest    | Low      | Non-endemic             | Least Concern | no  | none                     | arboreal_frugivore        | no  | no  | yes |
| Psilopogon_zeilanicus    | Frugivore   | Forest    | Low      | Indian Subcontinent     | Least Concern | no  | Psilopogon_zeilanicus    | barbet                    | yes | yes | yes |
| Pycnonotus_cafer         | Omnivore    | Shrubland | Low      | Non-endemic             | Least Concern | no  | Pycnonotus_cafer         | arboreal_frugivore        | yes | yes | yes |
| Pycnonotus_jocosus       | Omnivore    | Shrubland | Low      | Non-endemic             | Least Concern | no  | Pycnonotus_jocosus       | arboreal_frugivore        | yes | yes | yes |
| Pycnonotus_luteolus      | Frugivore   | Shrubland | Low      | Indian Subcontinent     | Least Concern | no  | Pycnonotus_luteolus      | arboreal_frugivore        | yes | no  | yes |
| Pycnonotus_xantholaemus  | Frugivore   | Forest    | Moderate | Southern Deccan Plateau | Vulnerable    | yes | none                     | arboreal_frugivore        | no  | no  | yes |
| Rhipidura_albicollis     | Invertivore | Forest    | Low      | Non-endemic             | Least Concern | no  | none                     | flycatcher                | no  | no  | yes |
| Rhipidura_albogularis    | Invertivore | Forest    | Low      | Mainland India          | Least Concern | no  | none                     | flycatcher                | no  | no  | yes |
| Rhipidura_aureola        | Invertivore | Forest    | Moderate | Non-endemic             | Least Concern | yes | none                     | flycatcher                | no  | no  | yes |
| Rubigula_flaviventris    | Frugivore   | Forest    | Low      | Non-endemic             | Least Concern | no  | Rubigula_flaviventris    | bulbul                    | yes | no  | yes |
| Saxicola_caprata         | Invertivore | Shrubland | Low      | Non-endemic             | Least Concern | no  | none                     | ground_feeding_passerines | yes | yes | no  |
| Saxicola_torquatus       | Invertivore | Shrubland | Low      | Non-endemic             | Least Concern | no  | none                     | ground_feeding_passerines | yes | yes | no  |
| Saxicoloides_fulicatus   | Invertivore | Shrubland | Low      | Indian Subcontinent     | Least Concern | no  | none                     | ground_feeding_passerines | yes | yes | yes |
| Sitta_castanea           | Invertivore | Forest    | Moderate | Indian Subcontinent     | Least Concern | yes | none                     | arboreal_invertivore      | no  | no  | yes |
| Sitta_frontalis          | Invertivore | Forest    | Moderate | Non-endemic             | Least Concern | yes | Sitta_frontalis          | arboreal_invertivore      | no  | no  | yes |
| Spilopelia_chinensis     | Granivore   | Woodland  | Low      | Non-endemic             | Least Concern | no  | Spilopelia_chinensis     | doves                     | yes | yes | yes |

|                             |             |                |          |                     |                 |     |                       |                           |     |     |     |
|-----------------------------|-------------|----------------|----------|---------------------|-----------------|-----|-----------------------|---------------------------|-----|-----|-----|
| Spilopelia_senegalensis     | Granivore   | Woodland       | Low      | Non-endemic         | Least Concern   | no  | none                  | doves                     | yes | yes | yes |
| Spilopelia_suratensis       | Granivore   | Woodland       | Low      | Non-endemic         | Least Concern   | no  | Spilopelia_suratensis | medium_doves              | yes | yes | yes |
| Sterna_aurantia             | Vertivore   | Riverine       | Moderate | Non-endemic         | Vulnerable      | yes | none                  | small_wader_lapwing       | yes | no  | no  |
| Streptopelia_decaocto       | Omnivore    | Human Modified | Low      | Non-endemic         | Least Concern   | no  | none                  | doves                     | yes | yes | yes |
| Streptopelia_orientalis     | Omnivore    | Woodland       | Low      | Non-endemic         | Least Concern   | no  | none                  | doves                     | yes | no  | yes |
| Streptopelia_tranquebarica  | Granivore   | Woodland       | Low      | Non-endemic         | Least Concern   | no  | none                  | doves                     | yes | yes | no  |
| Strix_leptogrammica         | Vertivore   | Forest         | Low      | Non-endemic         | Least Concern   | no  | none                  | arboreal_invertivore      | no  | no  | yes |
| Sturnia_pagodarum           | Omnivore    | Forest         | Low      | Non-endemic         | Least Concern   | no  | none                  | myna                      | yes | no  | yes |
| Tephrodornis_pondicerianus  | Invertivore | Forest         | Moderate | Non-endemic         | Least Concern   | yes | none                  | arboreal_invertivore      | no  | no  | yes |
| Tephrodornis_virgatus       | Invertivore | Forest         | Moderate | Non-endemic         | Least Concern   | yes | none                  | arboreal_invertivore      | no  | no  | yes |
| Terpsiphone_paradisi        | Invertivore | Woodland       | Low      | Non-endemic         | Least Concern   | no  | none                  | flycatcher                | no  | no  | yes |
| Threskiornis_melanocephalus | Vertivore   | Wetland        | Low      | Non-endemic         | Near Threatened | yes | none                  | large_wader               | no  | yes | no  |
| Treron_bicinctus            | Frugivore   | Forest         | Moderate | Non-endemic         | Least Concern   | yes | none                  | doves                     | no  | no  | yes |
| Treron_phoenicopterus       | Frugivore   | Forest         | Low      | Non-endemic         | Least Concern   | no  | none                  | doves                     | no  | yes | yes |
| Tringa_ochropus             | Vertivore   | Wetland        | Low      | Non-endemic         | Least Concern   | no  | none                  | small_wader_lapwing       | yes | no  | no  |
| Turdus_simillimus           | Omnivore    | Forest         | Low      | Indian Subcontinent | Least Concern   | no  | none                  | ground_feeding_passerines | no  | no  | yes |
| Turdus_unicolor             | Invertivore | Forest         | Low      | Indian Subcontinent | Least Concern   | no  | none                  | ground_feeding_passerines | no  | no  | yes |
| Upupa_epops                 | Invertivore | Grassland      | Moderate | Non-endemic         | Least Concern   | yes | none                  | ground_dweller_large      | yes | no  | yes |
| Vanellus_indicus            | Invertivore | Wetland        | Low      | Non-endemic         | Least Concern   | no  | Vanellus_indicus      | small_wader_lapwing       | yes | yes | yes |
| Vanellus_malabaricus        | Invertivore | Grassland      | Low      | Indian Subcontinent | Least Concern   | no  | none                  | small_wader_lapwing       | yes | yes | no  |
| Zosterops_palpebrosus       | Omnivore    | Forest         | Low      | Non-endemic         | Least Concern   | no  | Zosterops_palpebrosus | arboreal_frugivore        | yes | no  | yes |

**Table S7. Species-wise relative abundance in each farming system when compared to a natural forest baseline.** The posterior distribution (PD) and estimated percentage difference in abundance (with lower and upper 95% Bayesian credible intervals) are shown.

|                           | ZBNF   |              |                       |                       | Agrichemical |              |                       |                       |
|---------------------------|--------|--------------|-----------------------|-----------------------|--------------|--------------|-----------------------|-----------------------|
| Species                   | PD     | % difference | % difference lower CI | % difference upper CI | PD           | % difference | % difference lower CI | % difference upper CI |
| Acridotheres_fuscus       | 74.19  | -79.82       | -100.00               | 339.19                | 51.05        | 7.27         | -100.00               | 2702.35               |
| Acridotheres_ginginianus  | 70.94  | 215.42       | -99.97                | 4190.42               | 81.36        | 760.74       | -99.98                | 21014.98              |
| Acridotheres_tristis      | 100.00 | 85141.43     | 7675.30               | 367193.87             | 100.00       | 292554.74    | 26839.53              | 1259461.21            |
| Acrocephalus_dumetorum    | 96.03  | 228.16       | -42.08                | 693.70                | 98.59        | 711.11       | -49.23                | 2763.24               |
| Actitis_hypoleucos        | 70.20  | 276.58       | -99.81                | 11137.15              | 94.80        | 5003.06      | -99.77                | 133954.51             |
| Aegithina_tiphia          | 100.00 | -99.56       | -100.00               | -96.49                | 99.44        | -99.00       | -100.00               | -89.17                |
| Aethopyga_siparaja        | 91.15  | -100.00      | -100.00               | -34.04                | 82.03        | -99.93       | -100.00               | 1372.27               |
| Alauda_gulgula            | 100.00 | 19053.81     | 883.54                | 118678.37             | 100.00       | 95533.98     | 5460.55               | 582728.64             |
| Alcedo_atthis             | 82.75  | 757.07       | -99.74                | 19897.20              | 97.98        | 11212.95     | -97.73                | 269592.95             |
| Alcedo_hercules           | 84.84  | -87.87       | -99.99                | 61.64                 | 67.89        | 188.10       | -99.97                | 4550.25               |
| Alcippe_poicephala        | 99.98  | -99.89       | -100.00               | -98.14                | 98.68        | -99.48       | -100.00               | -87.87                |
| Alexandrinus_krameri      | 100.00 | 6262.27      | 2439.29               | 11008.64              | 100.00       | 13670.53     | 5250.11               | 26299.67              |
| Amandava_amandava         | 66.18  | 204.60       | -99.99                | 12017.65              | 54.75        | 40.48        | -99.99                | 6081.16               |
| Amaurornis_phoenicurus    | 94.21  | 3195.69      | -99.69                | 68510.35              | 99.96        | 60584.15     | -37.77                | 907426.33             |
| Ammomanes_phoenicura      | 100.00 | 15941.23     | 169.56                | 136893.17             | 99.84        | 6583.59      | -73.97                | 66931.32              |
| Anastomus_oscitans        | 99.93  | 17751.18     | -52.94                | 260774.81             | 100.00       | 104506.77    | 353.64                | 1434603.11            |
| Anhinga_melanogaster      | 58.50  | -41.70       | -99.99                | 1393.95               | 86.01        | 1545.65      | -99.99                | 45242.55              |
| Anthraceroceros_coronatus | 98.35  | -99.71       | -100.00               | -89.65                | 87.15        | -96.34       | -100.00               | 51.68                 |
| Anthus_godlewskii         | 57.53  | 42.35        | -99.80                | 1710.88               | 98.05        | 1877.04      | -82.86                | 18713.37              |
| Anthus_rufulus            | 100.00 | 38345.04     | 2784.18               | 181944.67             | 100.00       | 106488.98    | 10799.89              | 507077.44             |
| Arachnothera_longirostra  | 88.70  | -99.99       | -100.00               | 56.36                 | 79.14        | -99.81       | -100.00               | 2983.77               |
| Ardea_alba                | 99.91  | 20584.77     | -61.38                | 306058.01             | 99.99        | 30950.57     | -42.60                | 419760.57             |
| Ardea_cinerea             | 82.10  | 834.60       | -99.81                | 25068.01              | 93.61        | 5385.45      | -99.63                | 185191.23             |
| Ardea_intermedia          | 100.00 | 65802.70     | 978.18                | 789254.85             | 99.99        | 19387.80     | 116.53                | 223618.37             |



|                               |        |          |         |           |        |          |         |           |
|-------------------------------|--------|----------|---------|-----------|--------|----------|---------|-----------|
| Ardea_purpurea                | 53.24  | -17.35   | -99.98  | 1556.04   | 83.55  | 737.83   | -99.86  | 15217.64  |
| Ardeola_grayii                | 100.00 | 44803.36 | 756.92  | 453985.29 | 100.00 | 83649.82 | 1659.01 | 850576.93 |
| Argya_affinis                 | 96.78  | -75.93   | -97.23  | -33.19    | 50.39  | 0.87     | -93.72  | 231.44    |
| Argya_caudata                 | 97.88  | 4184.06  | -97.78  | 43542.35  | 99.93  | 62621.51 | -69.98  | 796982.25 |
| Argya_striata                 | 81.91  | 56.60    | -44.35  | 205.46    | 79.04  | 55.26    | -59.43  | 214.73    |
| Athene_brama                  | 88.03  | 459.20   | -94.36  | 3579.63   | 99.94  | 13606.43 | 2.24    | 109412.26 |
| Bubulcus_ibis                 | 100.00 | 67730.92 | 6130.22 | 312095.48 | 100.00 | 69338.38 | 5721.76 | 322711.03 |
| Cacomantis_merulinus          | 67.60  | 176.86   | -99.99  | 4583.08   | 74.90  | 419.62   | -99.99  | 10800.59  |
| Cacomantis_passerinus         | 98.19  | -98.85   | -100.00 | -79.03    | 89.36  | -95.43   | -100.00 | 9.20      |
| Cacomantis_sonneratii         | 99.84  | -99.58   | -100.00 | -93.86    | 95.83  | -98.20   | -100.00 | -64.13    |
| Calandrella_dukhunensis       | 98.21  | 6884.21  | -96.46  | 113719.65 | 99.73  | 45309.02 | -95.46  | 840109.46 |
| Calidris_minuta               | 93.10  | 3297.13  | -98.83  | 69492.94  | 97.36  | 14944.30 | -97.03  | 399473.33 |
| Caprimulgus_asiaticus         | 93.70  | -97.25   | -100.00 | -41.81    | 81.71  | -90.45   | -100.00 | 147.69    |
| Caprimulgus_atripennis        | 89.95  | -96.09   | -100.00 | 1.94      | 76.83  | -85.88   | -100.00 | 281.28    |
| Centropus_sinensis            | 62.60  | 18.30    | -68.62  | 139.93    | 99.11  | 473.61   | -13.35  | 1500.62   |
| Ceryle_rudis                  | 69.33  | -54.03   | -99.99  | 233.48    | 96.76  | 2450.05  | -98.12  | 26487.61  |
| Chalcophaps_indica            | 98.58  | -98.46   | -100.00 | -79.44    | 84.88  | -90.43   | -100.00 | 69.52     |
| Charadrius_dubius             | 53.53  | 26.22    | -100.00 | 3605.61   | 86.69  | 1763.13  | -99.94  | 54574.89  |
| Chloropsis_aurifrons          | 99.90  | -99.55   | -100.00 | -94.75    | 93.69  | -96.85   | -100.00 | -44.64    |
| Chloropsis_jerdoni            | 93.20  | -82.04   | -99.90  | -20.87    | 99.69  | 2841.01  | -62.62  | 16307.52  |
| Chrysocolaptes_festivus       | 99.54  | -99.53   | -100.00 | -92.23    | 94.96  | -98.03   | -100.00 | -56.81    |
| Chrysocolaptes_guttacristatus | 97.16  | -93.86   | -99.99  | -55.39    | 62.68  | -43.70   | -99.93  | 468.03    |
| Chrysocolaptes_lucidus        | 91.60  | -97.26   | -100.00 | -23.26    | 79.85  | -89.52   | -100.00 | 225.76    |
| Cinnyris_asiaticus            | 99.85  | -83.06   | -96.29  | -62.24    | 84.99  | -55.98   | -93.67  | 21.76     |
| Cinnyris_lotenius             | 90.73  | -99.99   | -100.00 | -20.79    | 80.78  | -99.91   | -100.00 | 1601.63   |
| Cisticola_juncidis            | 64.58  | 124.41   | -99.99  | 3845.90   | 75.25  | 387.70   | -99.99  | 10208.33  |
| Clamator_jacobinus            | 95.23  | -97.60   | -100.00 | -54.03    | 83.38  | -91.89   | -100.00 | 119.78    |
| Columba_livia                 | 95.41  | 1544.50  | -97.19  | 9992.10   | 100.00 | 18054.99 | 1763.98 | 51534.27  |

|                         |        |           |         |            |        |           |          |            |
|-------------------------|--------|-----------|---------|------------|--------|-----------|----------|------------|
| Columba_punicea         | 96.58  | -98.46    | -100.00 | -67.89     | 75.51  | -83.88    | -100.00  | 341.30     |
| Copsychus_malabaricus   | 97.69  | -99.27    | -100.00 | -78.76     | 90.43  | -97.10    | -100.00  | -5.47      |
| Copsychus_sularis       | 99.35  | -94.89    | -100.00 | -73.61     | 90.78  | -88.21    | -99.97   | -8.35      |
| Coracias_benghalensis   | 100.00 | 21445.45  | 1669.47 | 86639.19   | 100.00 | 516706.61 | 21511.58 | 2253633.81 |
| Coracina_macei          | 80.89  | -85.50    | -100.00 | 144.89     | 51.46  | 8.44      | -99.94   | 1979.63    |
| Corvus_macrorhynchos    | 100.00 | 5727.80   | 1074.12 | 13884.04   | 100.00 | 6115.74   | 1399.43  | 14921.73   |
| Corvus_splendens        | 100.00 | 1222.74   | 93.41   | 3471.26    | 99.94  | 1033.03   | 58.85    | 2849.69    |
| Culicicapa_ceylonensis  | 99.64  | -99.62    | -100.00 | -93.07     | 95.61  | -98.31    | -100.00  | -60.79     |
| Cyornis_tickelliae      | 99.21  | -97.23    | -100.00 | -80.13     | 92.24  | -94.48    | -100.00  | -26.27     |
| Dendrocopos_macei       | 96.68  | -98.15    | -100.00 | -67.11     | 86.36  | -93.31    | -100.00  | 57.05      |
| Dendronanthus_indicus   | 86.68  | -94.35    | -100.00 | 46.64      | 72.29  | -80.41    | -100.00  | 511.55     |
| Dicaeum_agile           | 99.99  | -99.85    | -100.00 | -97.41     | 93.48  | -98.07    | -100.00  | -43.61     |
| Dicaeum_erythrorhynchos | 100.00 | -99.91    | -100.00 | -98.54     | 95.91  | -98.71    | -100.00  | -70.96     |
| Dicrurus_aeneus         | 99.83  | -99.68    | -100.00 | -94.97     | 96.48  | -98.63    | -100.00  | -71.20     |
| Dicrurus_caerulescens   | 92.48  | -80.40    | -99.80  | -16.49     | 81.45  | -78.89    | -99.98   | 97.67      |
| Dicrurus_leucophaeus    | 61.85  | -37.03    | -99.96  | 356.88     | 56.04  | 33.04     | -99.91   | 1429.75    |
| Dicrurus_macrocerus     | 100.00 | 1408.88   | 536.93  | 2605.33    | 100.00 | 2427.65   | 797.97   | 4525.34    |
| Dicrurus_paradiseus     | 93.63  | -87.25    | -99.92  | -25.97     | 79.79  | -79.42    | -99.99   | 120.24     |
| Dinopium_benghalense    | 63.00  | -23.97    | -93.46  | 120.80     | 99.94  | 4066.13   | 3.94     | 23406.78   |
| Dryocopus_javensis      | 92.11  | -96.23    | -100.00 | -23.46     | 78.53  | -86.91    | -100.00  | 237.96     |
| Ducula_aenea            | 96.39  | -98.02    | -100.00 | -64.80     | 73.24  | -80.88    | -100.00  | 441.82     |
| Dumetia_hyperythra      | 95.49  | -97.88    | -100.00 | -57.84     | 84.93  | -92.25    | -100.00  | 83.10      |
| Egretta_garzetta        | 100.00 | 351143.92 | 4838.16 | 3891580.75 | 100.00 | 380952.31 | 2878.83  | 4123249.46 |
| Eremopterix_griseus     | 80.45  | -77.93    | -99.98  | 95.29      | 85.30  | -79.42    | -99.92   | 41.83      |
| Eudynamys_scolopaceus   | 99.73  | 841.86    | -1.94   | 2520.94    | 99.18  | 715.58    | -42.64   | 2629.71    |
| Euodice_malabarica      | 99.15  | 6158.66   | -96.98  | 73113.96   | 88.85  | 860.79    | -99.51   | 10656.94   |
| Ficedula_superciliaris  | 90.39  | -96.28    | -100.00 | -3.60      | 77.50  | -86.77    | -100.00  | 286.21     |
| Galloperdix_spadicea    | 90.63  | -92.74    | -100.00 | -7.77      | 65.54  | -60.13    | -99.99   | 581.12     |

|                             |        |          |         |           |        |          |         |           |
|-----------------------------|--------|----------|---------|-----------|--------|----------|---------|-----------|
| Gallus_gallus               | 99.78  | -99.16   | -100.00 | -91.02    | 89.93  | -94.66   | -100.00 | 0.72      |
| Gallus_sonneratii           | 92.86  | -95.45   | -100.00 | -30.86    | 71.61  | -74.93   | -100.00 | 412.17    |
| Geokichla_citrina           | 98.64  | -98.38   | -100.00 | -80.22    | 84.65  | -89.84   | -100.00 | 81.48     |
| Glareola_maldivarum         | 53.08  | -18.00   | -100.00 | 3135.10   | 69.48  | -77.75   | -100.00 | 1438.52   |
| Glaucidium_radiatum         | 97.10  | 868.48   | -75.09  | 4764.38   | 86.55  | 548.29   | -98.32  | 5634.38   |
| Gracula_religiosa           | 95.24  | -98.98   | -100.00 | -66.86    | 77.18  | -88.53   | -100.00 | 376.03    |
| Gracupica_contra            | 100.00 | 28254.08 | 1406.33 | 168015.75 | 100.00 | 26449.41 | 871.75  | 167171.15 |
| Gymnoris_xanthocollis       | 90.19  | -94.47   | -100.00 | -3.04     | 81.71  | -88.55   | -100.00 | 154.60    |
| Halcyon_smyrnensis          | 96.41  | -89.51   | -97.65  | -74.68    | 95.24  | -85.32   | -97.45  | -59.67    |
| Harpactes_fasciatus         | 99.53  | -99.52   | -100.00 | -91.83    | 95.35  | -98.02   | -100.00 | -57.43    |
| Hemicircus_canente          | 98.26  | -98.93   | -100.00 | -79.83    | 90.93  | -95.71   | -100.00 | -9.67     |
| Hemipus_picatus             | 99.41  | -99.63   | -100.00 | -91.50    | 94.78  | -98.36   | -100.00 | -57.22    |
| Hierococcyx_varius          | 60.56  | 22.10    | -83.33  | 218.86    | 70.71  | 92.58    | -96.42  | 800.50    |
| Himalayapsitta_cyanocephala | 99.74  | -99.75   | -100.00 | -95.32    | 91.00  | -97.22   | -100.00 | -12.18    |
| Himantopus_himantopus       | 63.99  | 175.20   | -99.98  | 11065.62  | 95.93  | 8914.39  | -99.72  | 288756.15 |
| Hydrophasianus_chirurgus    | 64.88  | 165.11   | -99.97  | 7996.46   | 90.39  | 2836.42  | -99.95  | 89359.34  |
| Hypothymis_azurea           | 99.94  | -99.69   | -100.00 | -95.43    | 97.23  | -98.68   | -100.00 | -73.72    |
| Iduna_caligata              | 99.98  | 2738.27  | 31.47   | 10905.23  | 99.26  | 2945.43  | -66.48  | 21066.88  |
| Irena_puella                | 90.35  | -96.07   | -100.00 | -4.24     | 63.05  | -63.32   | -100.00 | 1222.00   |
| Ixobrychus_cinnamomeus      | 74.56  | 375.55   | -99.95  | 11670.11  | 91.85  | 3750.43  | -99.50  | 114332.87 |
| Ketupa_zeilonensis          | 79.24  | -87.28   | -100.00 | 234.06    | 56.76  | 55.14    | -100.00 | 4055.32   |
| Kittacincla_malabarica      | 99.94  | -99.72   | -100.00 | -95.56    | 97.10  | -98.76   | -100.00 | -73.65    |
| Lalage_melanoptera          | 86.31  | -93.67   | -100.00 | 53.27     | 71.06  | -78.80   | -100.00 | 567.95    |
| Lanius_vittatus             | 64.24  | 120.01   | -99.99  | 3041.80   | 72.09  | 285.78   | -99.98  | 8034.30   |
| Larviva_brunnea             | 98.56  | -98.83   | -100.00 | -80.56    | 90.58  | -95.48   | -100.00 | -9.10     |
| Leiopicus_mahrattensis      | 98.53  | -98.69   | -100.00 | -79.18    | 89.40  | -94.89   | -100.00 | 7.87      |
| Leptocoma_zeilonica         | 90.21  | 134.96   | -58.06  | 457.00    | 98.90  | 974.44   | -79.31  | 4855.77   |
| Lonchura_atricapilla        | 68.75  | 361.58   | -100.00 | 40703.53  | 60.34  | 143.25   | -100.00 | 39175.96  |

|                           |        |          |         |           |        |          |         |           |
|---------------------------|--------|----------|---------|-----------|--------|----------|---------|-----------|
| Lonchura_kelaarti         | 62.91  | -57.67   | -100.00 | 939.56    | 53.90  | -24.37   | -100.00 | 2316.90   |
| Lonchura_malacca          | 51.08  | 9.12     | -100.00 | 3998.88   | 67.54  | -70.47   | -100.00 | 1564.33   |
| Lonchura_punctulata       | 100.00 | 20176.02 | 22.60   | 128284.58 | 97.98  | 5227.49  | -94.67  | 64185.57  |
| Lonchura_striata          | 100.00 | 9080.29  | 199.03  | 33026.99  | 96.55  | 3839.42  | -98.84  | 40369.57  |
| Loriculus_venalis         | 99.91  | -98.96   | -100.00 | -92.21    | 77.68  | -79.24   | -100.00 | 179.61    |
| Machlolophus_xanthogenys  | 98.96  | -97.17   | -100.00 | -78.63    | 92.06  | -94.28   | -100.00 | -23.65    |
| Merops_leschenaulti       | 91.51  | -86.61   | -99.94  | -11.91    | 91.50  | -88.61   | -100.00 | -16.11    |
| Merops_orientalis         | 82.21  | 228.89   | -94.91  | 1066.97   | 90.01  | 744.45   | -98.58  | 6117.46   |
| Merops_philippinus        | 63.03  | 69.44    | -99.82  | 1170.09   | 96.19  | 1534.86  | -96.59  | 13061.43  |
| Microcarbo_niger          | 87.59  | 767.13   | -99.44  | 12823.09  | 99.95  | 34073.90 | -55.86  | 543373.43 |
| Micropternus_brachyurus   | 99.21  | -99.31   | -100.00 | -88.20    | 93.34  | -97.08   | -100.00 | -39.90    |
| Mirafra_affinis           | 99.98  | 7003.76  | 95.85   | 47629.40  | 100.00 | 7191.77  | 58.93   | 51214.12  |
| Mirafra_erythroptera      | 100.00 | 9680.46  | 127.14  | 64729.91  | 99.99  | 7131.93  | 52.03   | 53106.19  |
| Mixornis_gularis          | 99.90  | -99.79   | -100.00 | -96.45    | 97.88  | -98.99   | -100.00 | -79.57    |
| Monticola_cinclorhyncha   | 92.99  | -96.67   | -100.00 | -32.36    | 80.25  | -88.63   | -100.00 | 189.20    |
| Monticola_solitarius      | 91.68  | -94.87   | -100.00 | -18.17    | 69.43  | -71.21   | -100.00 | 464.50    |
| Motacilla_alba            | 92.29  | -96.62   | -100.00 | -28.99    | 79.38  | -88.35   | -100.00 | 186.95    |
| Motacilla_cinerea         | 99.83  | -98.65   | -100.00 | -90.31    | 97.89  | -96.74   | -100.00 | -71.39    |
| Motacilla_flava           | 86.61  | -94.05   | -100.00 | 53.37     | 71.81  | -78.55   | -100.00 | 511.15    |
| Motacilla_maderaspatensis | 93.69  | 1264.06  | -95.95  | 12159.66  | 92.33  | 1601.08  | -97.50  | 25443.59  |
| Muscicapa_dauurica        | 92.45  | -96.96   | -100.00 | -32.63    | 81.43  | -89.17   | -100.00 | 167.13    |
| Mycteria_leucocephala     | 74.73  | 374.60   | -99.98  | 11564.74  | 91.98  | 3348.57  | -99.74  | 101073.49 |
| Ninox_scutulata           | 90.43  | -95.85   | -100.00 | -3.66     | 76.86  | -85.65   | -100.00 | 274.94    |
| Nyctornis_athertoni       | 98.43  | -99.26   | -100.00 | -83.71    | 91.83  | -97.12   | -100.00 | -24.16    |
| Ocyrceros_birostris       | 59.20  | 56.50    | -99.96  | 2272.25   | 80.19  | 672.60   | -99.89  | 17548.17  |
| Oriolus_kundoo            | 91.20  | 363.99   | -90.86  | 1732.30   | 99.24  | 2958.69  | -79.50  | 20908.64  |
| Oriolus_xanthornus        | 89.41  | -71.45   | -98.18  | 5.51      | 99.66  | 3347.27  | -53.54  | 22756.63  |
| Orthotomus_sutorius       | 64.35  | -12.21   | -58.50  | 47.95     | 81.61  | -38.18   | -81.79  | 26.12     |

|                           |        |          |         |           |        |           |         |            |
|---------------------------|--------|----------|---------|-----------|--------|-----------|---------|------------|
| Ortygornis_pondicerianus  | 98.16  | 1325.92  | -79.73  | 9229.08   | 99.19  | 6373.65   | -91.00  | 61993.99   |
| Palaeornis_eupatria       | 82.85  | -81.44   | -99.99  | 89.08     | 94.35  | 501.35    | -94.11  | 2635.51    |
| Parus_cinereus            | 98.36  | -99.27   | -100.00 | -82.93    | 91.51  | -96.94    | -100.00 | -18.95     |
| Parus_major               | 99.78  | -99.63   | -100.00 | -94.14    | 95.88  | -98.46    | -100.00 | -62.92     |
| Passer_domesticus         | 73.14  | -78.84   | -100.00 | 467.43    | 63.04  | -58.51    | -100.00 | 1198.27    |
| Pavo_cristatus            | 97.79  | -98.11   | -100.00 | -73.95    | 82.30  | -87.65    | -100.00 | 123.94     |
| Pellorneum_ruficeps       | 99.98  | -99.86   | -100.00 | -97.83    | 98.40  | -99.32    | -100.00 | -85.71     |
| Pericrocotus_cinnamomeus  | 99.98  | -99.84   | -100.00 | -97.70    | 98.30  | -99.26    | -100.00 | -84.71     |
| Pericrocotus_flammeus     | 99.98  | -99.83   | -100.00 | -97.28    | 98.10  | -99.20    | -100.00 | -83.49     |
| Phaenicophaeus_tristis    | 98.90  | -99.11   | -100.00 | -84.79    | 92.26  | -96.58    | -100.00 | -26.12     |
| Phylloscopus_humei        | 94.60  | -98.20   | -100.00 | -52.28    | 83.91  | -93.24    | -100.00 | 113.99     |
| Phylloscopus_inornatus    | 95.49  | -97.85   | -100.00 | -56.84    | 83.26  | -91.70    | -100.00 | 111.47     |
| Phylloscopus_magnirostris | 98.29  | -99.20   | -100.00 | -82.47    | 91.76  | -96.91    | -100.00 | -22.83     |
| Phylloscopus_nitidus      | 98.16  | -99.22   | -100.00 | -82.59    | 90.75  | -96.97    | -100.00 | -10.03     |
| Phylloscopus_trochiloides | 62.19  | 26.83    | -80.10  | 228.22    | 63.91  | -41.85    | -99.78  | 335.13     |
| Picoides_nanus            | 99.09  | -99.24   | -100.00 | -87.58    | 92.66  | -96.98    | -100.00 | -35.19     |
| Picumnus_innominatus      | 99.51  | -99.28   | -100.00 | -89.88    | 93.40  | -97.02    | -100.00 | -43.15     |
| Picus_canus               | 86.39  | -94.42   | -100.00 | 60.28     | 72.41  | -81.36    | -100.00 | 524.41     |
| Picus_chlorolophus        | 99.60  | -99.40   | -100.00 | -90.64    | 94.09  | -97.64    | -100.00 | -50.06     |
| Picus_xanthopygaeus       | 90.19  | -96.02   | -100.00 | -2.34     | 76.94  | -86.29    | -100.00 | 285.03     |
| Ploceus_philippinus       | 97.96  | 23141.81 | -92.07  | 449738.69 | 100.00 | 156615.54 | 1366.63 | 1358566.26 |
| Pomatorhinus_horsfieldii  | 99.99  | -99.86   | -100.00 | -97.89    | 98.48  | -99.32    | -100.00 | -86.69     |
| Prinia_inornata           | 100.00 | 17203.43 | 533.31  | 119187.86 | 100.00 | 20619.42  | 670.16  | 137508.97  |
| Prinia_socialis           | 99.89  | 796.11   | 44.96   | 2433.44   | 100.00 | 3624.16   | 367.94  | 9871.84    |
| Prinia_sylvatica          | 93.65  | 462.12   | -88.73  | 2312.80   | 65.21  | 108.35    | -99.88  | 2065.96    |
| Psilopogon_haemacephalus  | 99.68  | -83.25   | -96.93  | -58.91    | 82.66  | 317.03    | -94.97  | 2926.01    |
| Psilopogon_lineatus       | 79.81  | -89.00   | -100.00 | 211.68    | 50.36  | -2.80     | -100.00 | 3306.31    |
| Psilopogon_zeilanicus     | 99.86  | -96.04   | -99.95  | -83.11    | 87.95  | -88.14    | -99.99  | 24.83      |

|                             |        |          |         |           |        |          |         |            |
|-----------------------------|--------|----------|---------|-----------|--------|----------|---------|------------|
| Pycnonotus_cafer            | 51.36  | 1.25     | -47.50  | 56.80     | 95.48  | 124.37   | -30.33  | 335.95     |
| Pycnonotus_jocosus          | 100.00 | -98.98   | -99.88  | -97.49    | 100.00 | -96.47   | -99.43  | -90.89     |
| Pycnonotus_luteolus         | 97.86  | -91.41   | -99.86  | -58.93    | 67.41  | -59.71   | -99.99  | 446.72     |
| Pycnonotus_xantholaemus     | 93.50  | -97.48   | -100.00 | -35.88    | 69.36  | -75.07   | -100.00 | 776.73     |
| Rhipidura_albicollis        | 92.08  | -96.17   | -100.00 | -24.78    | 78.60  | -86.37   | -100.00 | 227.16     |
| Rhipidura_albogularis       | 85.55  | -93.52   | -100.00 | 64.66     | 70.31  | -77.80   | -100.00 | 544.59     |
| Rhipidura_aureola           | 98.88  | -99.30   | -100.00 | -86.01    | 92.58  | -97.17   | -100.00 | -31.38     |
| Rubigula_flaviventris       | 95.26  | -90.40   | -99.95  | -41.89    | 64.20  | -53.28   | -99.99  | 563.98     |
| Saxicola_caprata            | 74.53  | -78.51   | -100.00 | 337.64    | 52.44  | -12.61   | -99.97  | 1374.57    |
| Saxicola_torquatus          | 54.14  | -16.58   | -99.87  | 630.64    | 98.49  | 3543.91  | -91.33  | 35485.31   |
| Saxicoloides_fulicatus      | 90.98  | -84.85   | -99.99  | -6.64     | 56.75  | -24.63   | -99.65  | 513.81     |
| Sitta_castanea              | 99.19  | -99.52   | -100.00 | -90.08    | 94.38  | -98.02   | -100.00 | -51.35     |
| Sitta_frontalis             | 99.96  | -99.76   | -100.00 | -96.23    | 97.45  | -98.92   | -100.00 | -76.79     |
| Spilopelia_chinensis        | 54.34  | -4.93    | -63.96  | 76.31     | 93.53  | 165.34   | -49.37  | 550.69     |
| Spilopelia_senegalensis     | 100.00 | 15957.00 | 2169.06 | 45681.77  | 100.00 | 11942.22 | 606.20  | 40390.42   |
| Spilopelia_suratensis       | 54.18  | -6.01    | -80.15  | 106.48    | 100.00 | 2431.07  | 393.68  | 5955.38    |
| Sterna_aurantia             | 79.95  | 1425.07  | -99.98  | 111990.99 | 97.80  | 30512.39 | -99.97  | 1388534.71 |
| Streptopelia_decaocto       | 56.59  | -14.59   | -95.34  | 193.52    | 96.68  | 1388.59  | -94.05  | 8958.84    |
| Streptopelia_orientalis     | 60.11  | -34.90   | -99.94  | 412.27    | 61.25  | 83.30    | -99.98  | 2410.36    |
| Streptopelia_tranquebarica  | 95.59  | 3372.92  | -97.35  | 51782.12  | 96.60  | 6458.06  | -99.06  | 119206.26  |
| Strix_leptogrammica         | 93.98  | -96.88   | -100.00 | -43.44    | 62.71  | -57.58   | -100.00 | 865.34     |
| Sturnia_pagodarum           | 74.58  | -76.70   | -100.00 | 304.96    | 66.45  | 156.01   | -99.97  | 4631.74    |
| Tephrodornis_pondicerianus  | 99.64  | -99.59   | -100.00 | -92.83    | 95.35  | -98.25   | -100.00 | -58.95     |
| Tephrodornis_virgatus       | 99.85  | -99.75   | -100.00 | -95.67    | 97.20  | -98.94   | -100.00 | -76.47     |
| Terpsiphone_paradisi        | 93.00  | -96.93   | -100.00 | -31.15    | 80.14  | -88.67   | -100.00 | 187.72     |
| Threskiornis_melanocephalus | 96.71  | 9970.15  | -96.97  | 271164.13 | 100.00 | 79171.70 | 49.87   | 1262692.50 |
| Treron_bicinctus            | 92.45  | -96.69   | -100.00 | -27.15    | 65.98  | -67.46   | -100.00 | 897.23     |
| Treron_phoenicopterus       | 87.21  | -90.66   | -100.00 | 36.60     | 59.54  | 68.43    | -99.99  | 2483.83    |

|                       |       |         |         |          |        |          |         |           |
|-----------------------|-------|---------|---------|----------|--------|----------|---------|-----------|
| Tringa_ochropus       | 68.55 | 315.90  | -99.99  | 18716.08 | 95.79  | 9856.89  | -99.60  | 324273.89 |
| Turdus_simillimus     | 96.83 | -97.85  | -100.00 | -67.75   | 80.68  | -86.84   | -100.00 | 148.00    |
| Turdus_unicolor       | 85.30 | -93.97  | -100.00 | 78.79    | 70.80  | -78.07   | -100.00 | 592.77    |
| Upupa_epops           | 58.94 | 29.11   | -98.11  | 431.41   | 61.86  | 63.80    | -99.86  | 1327.47   |
| Vanellus_indicus      | 97.65 | 439.70  | -44.81  | 1911.93  | 100.00 | 1883.59  | 126.82  | 6807.14   |
| Vanellus_malabaricus  | 98.98 | 5212.97 | -98.89  | 38931.37 | 99.49  | 19608.18 | -98.59  | 215150.16 |
| Zosterops_palpebrosus | 99.99 | -99.64  | -100.00 | -95.71   | 94.73  | -97.37   | -100.00 | -52.65    |

**Table S8. Effects of the transition to ZBNF, and of farming system-wise effects of increasing landscape-level agricultural productivity and of economic profit for each species.** The posterior distribution (PD) and estimated percentage change in abundance (with lower and upper 95% Bayesian credible intervals) per one unit increase in yield/profit are shown. The species ID numbers corresponds to those depicted in Figure 3.a.

| Species                   | ID number | Effect of the transition to ZBNF |          |                   |                   | Effect of agricultural productivity in ZBNF systems |          |                   |                     | Effect of agricultural productivity in agrichemical systems |          |                   |                   | Effect of economic profit in ZBNF systems |          |                   |                   | Effect of economic profit in agrichemical systems |          |                   |                   |
|---------------------------|-----------|----------------------------------|----------|-------------------|-------------------|-----------------------------------------------------|----------|-------------------|---------------------|-------------------------------------------------------------|----------|-------------------|-------------------|-------------------------------------------|----------|-------------------|-------------------|---------------------------------------------------|----------|-------------------|-------------------|
|                           |           | PD                               | % change | % change lower CI | % change upper CI | PD                                                  | % change | % change lower CI | % change upper CI   | PD                                                          | % change | % change lower CI | % change upper CI | PD                                        | % change | % change lower CI | % change upper CI | PD                                                | % change | % change lower CI | % change upper CI |
| Acridotheres_gin-ginianus | 44.00     | 57.95                            | 18.11    | -90.12            | 212.09            | 66.58                                               | -36.70   | -98.86            | 148.19              | 86.99                                                       | -83.64   | -99.99            | 27.75             | 88.91                                     | -32.90   | -68.34            | 8.02              | 77.99                                             | -49.06   | -97.82            | 59.61             |
| Acridotheres_tristis      | 58.00     | 99.25                            | 40.26    | 10.58             | 72.38             | 79.28                                               | 10.74    | -12.43            | 33.92               | 100.00                                                      | -68.63   | -77.64            | -58.51            | 65.66                                     | 4.01     | -11.52            | 20.82             | 100.00                                            | -40.82   | -51.94            | -29.80            |
| Acrocephalus_dumetorum    | 63.00     | 85.84                            | 46.13    | -32.30            | 135.95            | 99.21                                               | -67.94   | -89.70            | -39.80              | 99.96                                                       | -90.71   | -99.22            | -74.41            | 54.01                                     | 1.92     | -34.81            | 38.69             | 98.23                                             | -54.04   | -82.74            | -21.72            |
| Actitis_hypoleucos        | 88.00     | 86.91                            | 119.28   | -68.16            | 469.07            | 96.43                                               | 410.27   | -73.32            | 1581.2 <sub>1</sub> | 62.78                                                       | -32.33   | -99.31            | 240.49            | 80.63                                     | -23.03   | -59.77            | 20.77             | 79.73                                             | -49.67   | -96.74            | 49.93             |
| Aegithina_tiphia          | 50.00     | 63.93                            | 29.00    | -82.07            | 210.51            | 53.81                                               | -9.21    | -95.27            | 210.48              | 81.69                                                       | -71.28   | -99.84            | 58.61             | 83.45                                     | -26.58   | -64.90            | 16.52             | 92.33                                             | -69.21   | -97.83            | -9.40             |
| Alauda_gulgula            | 14.00     | 94.99                            | -27.02   | -50.01            | -4.08             | 98.36                                               | 55.94    | 3.07              | 108.10              | 94.69                                                       | -22.15   | -41.71            | -1.93             | 52.71                                     | -1.06    | -26.02            | 26.72             | 100.00                                            | -29.93   | -39.47            | -20.04            |

|                        |        |        |        |        |        |        |                     |        |                     |        |        |        |                     |       |        |        |        |       |        |        |        |
|------------------------|--------|--------|--------|--------|--------|--------|---------------------|--------|---------------------|--------|--------|--------|---------------------|-------|--------|--------|--------|-------|--------|--------|--------|
| Alcedo_atthis          | 94.00  | 88.49  | 124.15 | -63.42 | 475.65 | 92.24  | 213.85              | -74.62 | 878.39              | 79.45  | -63.02 | -99.83 | 70.16               | 87.50 | -29.22 | -63.47 | 9.55   | 74.75 | -36.74 | -93.10 | 52.61  |
| Alcedo_hercules        | 95.00  | 86.51  | 125.81 | -77.17 | 505.74 | 94.80  | 315.24              | -67.42 | 1266.4 <sub>6</sub> | 85.25  | -76.94 | -99.97 | 36.25               | 65.84 | -12.05 | -55.60 | 41.73  | 89.89 | -66.19 | -98.41 | 1.15   |
| Alexandrinus_krameri   | 52.00  | 97.41  | 30.15  | 4.70   | 61.14  | 75.48  | -9.94               | -32.72 | 14.37               | 100.00 | -64.97 | -77.89 | -50.01              | 70.21 | 4.99   | -11.11 | 21.98  | 62.94 | 5.71   | -23.36 | 33.00  |
| Amandavandava          | 12.00  | 69.11  | -29.74 | -92.55 | 74.96  | 55.14  | 16.47               | -98.52 | 400.47              | 90.35  | 254.87 | -87.79 | 1038.1 <sub>7</sub> | 97.66 | -58.80 | -86.13 | -25.86 | 91.44 | 84.56  | -33.40 | 224.59 |
| Amaurornis_phoenicurus | 25.00  | 55.93  | -8.15  | -84.15 | 99.02  | 82.64  | 135.10              | -89.96 | 955.65              | 85.33  | -61.05 | -98.42 | 28.22               | 91.35 | -31.48 | -66.17 | 1.56   | 94.89 | -62.14 | -94.05 | -18.51 |
| Ammomanes_phoenicurus  | 16.00  | 75.66  | -23.69 | -65.83 | 32.35  | 74.91  | -21.86              | -64.01 | 30.66               | 86.55  | 109.25 | -65.00 | 401.39              | 72.33 | -12.64 | -48.03 | 22.32  | 80.21 | -45.69 | -89.86 | 39.84  |
| Anastomus_oscitans     | 11.00  | 79.51  | -32.74 | -76.47 | 27.28  | 79.20  | 49.16               | -47.26 | 191.61              | 68.98  | -15.67 | -59.55 | 37.79               | 96.24 | -33.69 | -58.35 | -6.97  | 99.13 | -30.73 | -51.04 | -10.92 |
| Anhinga_melanogaster   | 98.00  | 89.30  | 139.85 | -64.61 | 529.08 | 99.11  | 623.70              | -28.79 | 2215.1 <sub>0</sub> | 70.19  | -53.20 | -99.88 | 157.44              | 77.30 | -20.71 | -57.72 | 26.62  | 85.16 | -58.47 | -97.33 | 21.48  |
| Anthus_godlewskii      | 114.00 | 100.00 | 353.86 | 120.14 | 656.31 | 100.00 | 1023.3 <sub>5</sub> | 241.92 | 2188.5 <sub>1</sub> | 97.71  | 148.88 | 5.32   | 341.71              | 93.86 | 42.26  | -10.94 | 107.53 | 78.78 | 11.24  | -12.88 | 33.79  |
| Anthus_rufulus         | 27.00  | 67.06  | -6.06  | -28.00 | 17.69  | 100.00 | 67.07               | 31.40  | 105.54              | 64.90  | -4.72  | -22.35 | 16.16               | 80.44 | 10.81  | -10.26 | 32.27  | 99.99 | -19.23 | -28.03 | -10.78 |
| Ardea_alba             | 102.00 | 97.49  | 161.82 | -15.40 | 463.22 | 81.64  | 52.06               | -48.70 | 195.03              | 69.68  | -22.46 | -80.26 | 45.33               | 84.29 | -18.62 | -47.61 | 12.39  | 83.31 | -36.16 | -80.63 | 20.80  |
| Ardea_cinerea          | 89.00  | 85.83  | 119.91 | -77.28 | 483.12 | 67.13  | 56.35               | -95.08 | 470.99              | 82.99  | -77.57 | -99.94 | 63.10               | 86.95 | -31.81 | -69.48 | 10.49  | 80.46 | -52.14 | -97.00 | 41.39  |
| Ardea_intermedia       | 29.00  | 60.26  | -5.77  | -39.93 | 29.09  | 98.23  | 51.56               | 4.00   | 106.70              | 100.00 | 144.44 | 72.25  | 227.39              | 98.89 | -25.55 | -40.92 | -9.58  | 99.95 | 60.41  | 25.94  | 98.65  |
| Ardea_purpurea         | 110.00 | 97.48  | 230.83 | -34.42 | 677.27 | 100.00 | 1045.9 <sub>2</sub> | 133.77 | 2739.6 <sub>7</sub> | 80.93  | 101.97 | -83.88 | 434.40              | 74.56 | -15.98 | -50.10 | 25.04  | 72.71 | -29.77 | -87.04 | 50.88  |
| Ardeola_grayii         | 38.00  | 51.88  | 1.23   | -35.51 | 45.67  | 95.91  | 59.68               | -2.69  | 133.53              | 90.56  | 33.80  | -11.64 | 83.06               | 95.14 | -26.33 | -48.82 | -1.91  | 91.93 | -24.66 | -48.57 | 0.49   |
| Argyaaffinis           | 57.00  | 82.29  | 35.49  | -28.33 | 113.48 | 58.29  | -13.32              | -82.24 | 97.14               | 97.20  | -82.46 | -98.95 | -45.04              | 61.73 | 5.62   | -25.35 | 37.37  | 83.00 | -30.68 | -67.59 | 19.55  |
| Argya_audata           | 6.00   | 93.89  | -48.47 | -81.74 | -6.44  | 52.40  | 6.39                | -94.60 | 256.79              | 84.05  | -86.55 | -99.96 | 79.88               | 54.31 | -2.95  | -50.14 | 45.95  | 90.89 | -65.11 | -97.40 | -3.68  |
| Argya_striata          | 40.00  | 54.88  | 2.72   | -33.24 | 40.26  | 99.83  | -59.20              | -80.20 | -37.99              | 99.88  | -69.37 | -87.02 | -46.15              | 68.05 | 14.34  | -43.97 | 59.88  | 97.28 | -53.35 | -79.81 | -20.16 |
| Athene_brama           | 23.00  | 58.76  | -11.60 | -74.68 | 89.37  | 54.24  | -8.02               | -88.94 | 132.30              | 99.39  | -93.71 | -99.98 | -72.72              | 63.59 | -8.85  | -49.88 | 37.73  | 96.79 | -69.37 | -96.26 | -28.90 |



|                               |       |       |        |        |        |       |        |        |         |        |        |        |        |       |        |        |        |        |        |        |        |
|-------------------------------|-------|-------|--------|--------|--------|-------|--------|--------|---------|--------|--------|--------|--------|-------|--------|--------|--------|--------|--------|--------|--------|
| Bubulcus_ibis                 | 41.00 | 74.95 | 10.31  | -14.65 | 37.50  | 55.19 | 1.69   | -23.63 | 27.67   | 71.21  | -9.07  | -34.14 | 17.80  | 99.03 | -24.64 | -39.39 | -8.39  | 96.86  | 25.25  | 1.02   | 49.48  |
| Cacomantis_merulinus          | 77.00 | 80.84 | 84.62  | -70.12 | 367.16 | 65.19 | -32.61 | -98.26 | 146.16  | 84.74  | -78.25 | -99.99 | 44.46  | 78.99 | -22.61 | -63.90 | 21.85  | 71.70  | -37.61 | -96.77 | 72.22  |
| Calandrella_dukhunensis       | 35.00 | 50.25 | 0.63   | -84.73 | 154.86 | 58.46 | -19.96 | -97.74 | 241.58  | 83.00  | -81.55 | -99.99 | 97.21  | 52.86 | 2.31   | -50.69 | 58.81  | 73.95  | -45.29 | -96.54 | 97.21  |
| Calidris_minuta               | 46.00 | 63.91 | 25.10  | -77.49 | 191.56 | 87.75 | 226.59 | -86.04 | 1243.55 | 55.99  | 19.82  | -99.38 | 694.13 | 87.59 | -29.51 | -64.20 | 10.32  | 79.00  | -46.38 | -96.43 | 57.68  |
| Centropus_sinensis            | 30.00 | 56.61 | -4.58  | -44.95 | 39.73  | 84.94 | -27.43 | -61.61 | 12.85   | 99.99  | -86.24 | -97.12 | -70.74 | 59.59 | 4.09   | -24.75 | 33.44  | 99.98  | -75.20 | -93.09 | -54.05 |
| Ceryle_rudis                  | 67.00 | 77.63 | 63.75  | -67.05 | 282.29 | 92.08 | 171.92 | -59.19 | 627.47  | 97.90  | -91.70 | -99.96 | -54.50 | 79.55 | -23.16 | -61.27 | 22.61  | 98.91  | -82.82 | -99.00 | -50.85 |
| Charadrius_dubius             | 87.00 | 85.64 | 118.66 | -71.28 | 484.49 | 91.64 | 274.10 | -78.91 | 1296.96 | 76.65  | -66.61 | -99.99 | 125.41 | 87.40 | -32.57 | -69.94 | 8.96   | 81.91  | -55.81 | -97.94 | 34.82  |
| Chloropsis_jerdoni            | 3.00  | 96.94 | -64.68 | -91.18 | -27.52 | 55.18 | -8.63  | -88.93 | 133.02  | 100.00 | -98.46 | -99.99 | -93.16 | 88.08 | 36.55  | -18.52 | 105.35 | 100.00 | -92.53 | -99.16 | -81.03 |
| Chrysocolaptes_guttacristatus | 26.00 | 55.20 | -7.45  | -79.13 | 101.85 | 67.09 | 46.76  | -89.33 | 331.68  | 92.35  | -83.54 | -99.92 | -15.66 | 78.69 | -20.59 | -60.32 | 20.86  | 89.18  | -59.37 | -96.80 | 4.09   |
| Cinnyris_asiaticus            | 5.00  | 97.65 | -49.15 | -74.29 | -18.21 | 92.14 | -44.03 | -77.36 | 0.42    | 99.81  | -76.06 | -94.74 | -50.33 | 58.98 | 4.67   | -29.93 | 42.00  | 99.90  | -70.30 | -89.45 | -44.10 |
| Cisticola_juncidis            | 73.00 | 80.50 | 82.48  | -73.60 | 363.65 | 61.09 | -24.13 | -97.33 | 190.99  | 83.53  | -76.91 | -99.97 | 58.79  | 80.63 | -24.14 | -65.67 | 20.37  | 70.78  | -35.33 | -97.15 | 81.16  |
| Columba_livia                 | 4.00  | 99.54 | -61.33 | -82.80 | -34.69 | 80.49 | -57.48 | -96.85 | 58.67   | 100.00 | -88.73 | -96.21 | -79.27 | 91.91 | -31.62 | -63.41 | 3.62   | 100.00 | -72.13 | -86.29 | -57.44 |
| Copsychus_sauvagei            | 21.00 | 62.69 | -16.36 | -80.23 | 72.75  | 69.64 | -34.30 | -93.95 | 93.59   | 90.74  | -77.59 | -99.89 | -3.89  | 80.46 | -20.85 | -60.87 | 18.26  | 92.94  | -64.49 | -96.14 | -10.62 |
| Coracias_benghalensis         | 53.00 | 89.90 | 32.47  | -11.31 | 83.13  | 97.40 | -37.28 | -60.85 | -11.03  | 100.00 | -97.38 | -99.51 | -94.35 | 65.91 | -6.10  | -29.26 | 18.01  | 100.00 | -70.92 | -84.16 | -55.73 |
| Coracinus_macei               | 78.00 | 80.16 | 86.04  | -77.76 | 397.27 | 78.56 | 118.31 | -93.73 | 733.37  | 78.03  | -68.25 | -99.97 | 104.68 | 52.25 | 1.82   | -50.18 | 57.06  | 76.21  | -46.54 | -97.57 | 65.11  |
| Corvus_macrorhynchos          | 24.00 | 68.39 | -8.28  | -33.60 | 18.62  | 54.65 | 2.51   | -29.77 | 39.15   | 66.21  | 7.73   | -24.32 | 38.91  | 98.53 | -28.81 | -48.70 | -8.78  | 72.36  | 5.85   | -10.50 | 22.02  |
| Corvus splendens              | 18.00 | 75.24 | -17.36 | -52.51 | 23.57  | 83.29 | -26.73 | -64.72 | 14.36   | 59.49  | -7.59  | -50.97 | 46.36  | 96.94 | -31.54 | -56.03 | -6.91  | 75.54  | 20.41  | -23.62 | 73.22  |

|                       |        |        |        |        |        |       |        |        |         |        |         |         |         |       |        |        |        |        |        |        |        |
|-----------------------|--------|--------|--------|--------|--------|-------|--------|--------|---------|--------|---------|---------|---------|-------|--------|--------|--------|--------|--------|--------|--------|
| Cyornis_tickelliae    | 72.00  | 80.34  | 82.02  | -74.90 | 370.33 | 86.84 | -67.60 | -99.11 | 15.80   | 96.56  | -94.18  | -100.00 | -54.87  | 84.41 | -27.27 | -67.00 | 15.35  | 88.64  | -63.65 | -98.22 | 6.01   |
| Dicrurus_caeruleus    | 61.00  | 70.91  | 42.78  | -72.21 | 219.17 | 81.44 | -51.00 | -97.09 | 37.14   | 85.50  | -74.64  | -99.94  | 26.59   | 61.44 | -7.24  | -50.72 | 38.94  | 85.99  | -58.17 | -97.34 | 17.17  |
| Dicrurus_leucophaeus  | 82.00  | 83.30  | 102.16 | -76.26 | 420.39 | 69.66 | -38.30 | -96.43 | 99.93   | 91.76  | -84.99  | -99.99  | -11.18  | 81.30 | -23.86 | -64.23 | 17.79  | 78.61  | -45.11 | -95.59 | 39.63  |
| Dicrurus_macroercus   | 48.00  | 89.86  | 25.98  | -7.85  | 66.80  | 56.63 | 3.09   | -26.15 | 34.71   | 98.93  | -39.46  | -59.54  | -17.37  | 80.21 | -10.64 | -28.82 | 10.17  | 88.41  | -13.58 | -30.45 | 3.65   |
| Dicrurus_paradisus    | 69.00  | 75.65  | 73.81  | -78.73 | 391.99 | 88.41 | -67.31 | -99.00 | 8.59    | 96.00  | -92.97  | -100.00 | -49.02  | 64.26 | -9.98  | -51.00 | 39.13  | 88.69  | -63.56 | -97.67 | 6.34   |
| Dinopium_benghalense  | 33.00  | 50.25  | -0.26  | -64.92 | 87.54  | 88.69 | -47.07 | -85.45 | 8.14    | 100.00 | -98.81  | -99.99  | -94.95  | 51.59 | -1.01  | -47.13 | 47.65  | 100.00 | -90.96 | -98.93 | -78.92 |
| Egretta_garzetta      | 106.00 | 100.00 | 191.40 | 56.66  | 364.33 | 98.56 | -32.26 | -52.58 | -12.70  | 99.03  | -62.28  | -89.84  | -30.75  | 58.66 | -2.83  | -22.67 | 18.16  | 98.04  | -25.28 | -46.80 | -6.30  |
| Eremopterix_griseus   | 9.00   | 76.83  | -35.96 | -83.39 | 43.10  | 90.09 | 198.29 | -77.71 | 852.13  | 99.83  | 475.62  | 26.38   | 1223.10 | 99.28 | -58.46 | -82.00 | -31.35 | 99.81  | 178.85 | 23.02  | 366.19 |
| Eudynamis_scolopaceus | 83.00  | 96.63  | 104.09 | -11.40 | 256.78 | 83.55 | -32.72 | -75.71 | 16.01   | 94.95  | -57.51  | -92.21  | -13.36  | 70.14 | -16.32 | -64.06 | 35.60  | 98.84  | -62.38 | -89.44 | -28.18 |
| Euodice_malabarica    | 1.00   | 100.00 | -77.79 | -90.95 | -62.09 | 65.85 | 21.17  | -56.77 | 136.31  | 100.00 | 1974.91 | 223.38  | 5521.13 | 56.01 | -5.95  | -66.00 | 67.07  | 100.00 | -98.30 | -99.78 | -95.87 |
| Glareola_maldivarum   | 34.00  | 50.10  | 0.20   | -85.51 | 145.78 | 80.48 | 155.29 | -92.78 | 963.44  | 97.23  | 887.48  | -82.20  | 3089.25 | 97.01 | -52.85 | -81.72 | -16.49 | 99.60  | 226.84 | 61.17  | 455.50 |
| Glaucidium_radiatum   | 100.00 | 90.60  | 143.79 | -56.81 | 517.87 | 97.10 | -79.71 | -99.11 | -39.33  | 96.58  | -89.67  | -99.95  | -46.15  | 51.91 | 1.18   | -45.93 | 54.15  | 66.49  | -25.23 | -91.96 | 96.75  |
| Gracupica_contrata    | 17.00  | 81.41  | -21.15 | -51.17 | 17.87  | 83.93 | -17.83 | -44.16 | 9.66    | 53.13  | -2.09   | -37.21  | 39.98   | 91.53 | -16.61 | -33.84 | 2.25   | 67.09  | -3.75  | -17.92 | 9.83   |
| Halcyon_smyrnenensis  | 66.00  | 93.36  | 60.18  | -13.62 | 152.63 | 58.55 | -5.84  | -45.54 | 38.53   | 82.98  | -31.43  | -72.78  | 18.94   | 84.84 | -17.23 | -40.62 | 9.79   | 61.59  | 4.72   | -20.58 | 30.72  |
| Hierococcus_varius    | 91.00  | 96.19  | 121.35 | -18.50 | 313.15 | 81.38 | -33.33 | -78.73 | 22.82   | 96.33  | -76.43  | -98.56  | -30.87  | 93.44 | -29.98 | -59.28 | 1.61   | 87.54  | -39.80 | -82.94 | 8.85   |
| Himantopus_himantopus | 99.00  | 86.16  | 141.44 | -72.71 | 592.10 | 98.49 | 901.97 | -64.83 | 3704.63 | 63.64  | -38.42  | -99.80  | 300.39  | 59.18 | -6.42  | -50.83 | 50.37  | 74.24  | -46.16 | -97.60 | 86.54  |

|                                      |               |       |        |        |        |        |        |        |             |        |        |        |             |       |        |        |        |       |        |        |        |
|--------------------------------------|---------------|-------|--------|--------|--------|--------|--------|--------|-------------|--------|--------|--------|-------------|-------|--------|--------|--------|-------|--------|--------|--------|
| Hydroph<br>asianus_<br>chirurg<br>us | 93.00         | 85.96 | 122.69 | -71.09 | 494.40 | 84.63  | 180.26 | -86.41 | 1012.1<br>1 | 78.55  | -69.49 | -99.88 | 101.63      | 77.04 | -20.73 | -58.69 | 26.81  | 86.05 | -61.98 | -98.65 | 18.93  |
| Iduna_c<br>aligata                   | 97.00         | 95.16 | 137.93 | -25.43 | 391.08 | 98.60  | -74.06 | -95.75 | -40.86      | 98.66  | -88.62 | -99.90 | -56.74      | 65.24 | -8.27  | -42.25 | 30.03  | 81.98 | -36.05 | -86.40 | 20.85  |
| Ixobrych<br>us_cinn<br>amomeu<br>s   | 85.00         | 84.89 | 116.87 | -76.57 | 491.29 | 72.06  | 85.28  | -93.69 | 699.22      | 82.35  | -76.95 | -99.98 | 69.73       | 90.89 | -37.57 | -71.57 | 3.47   | 81.50 | -53.34 | -97.80 | 39.98  |
| Lanius_<br>vittatus                  | <b>74.00</b>  | 79.58 | 82.63  | -72.95 | 374.55 | 64.21  | -32.00 | -98.79 | 162.50      | 84.24  | -78.07 | -99.97 | 53.32       | 83.76 | -27.20 | -67.29 | 17.62  | 69.86 | -36.54 | -96.61 | 84.30  |
| Leptoco<br>ma_zeyl<br>onica          | 55.00         | 80.30 | 34.03  | -36.63 | 114.08 | 100.00 | -86.51 | -96.72 | -71.78      | 100.00 | -98.46 | -99.97 | -94.17      | 81.81 | 19.56  | -19.92 | 65.18  | 99.95 | -75.33 | -92.50 | -53.13 |
| Lonchur<br>a_atrica<br>pilla         | 19.00         | 60.60 | -17.08 | -89.62 | 116.92 | 50.53  | 1.51   | -98.78 | 363.84      | 75.05  | 148.68 | -97.30 | 913.82      | 95.01 | -57.49 | -88.26 | -15.66 | 75.05 | 59.81  | -70.43 | 192.47 |
| Lonchur<br>a_malac<br>ca             | <b>8.00</b>   | 74.08 | -37.92 | -91.81 | 58.88  | 55.90  | 20.40  | -96.84 | 411.08      | 93.40  | 471.56 | -91.87 | 1748.5<br>2 | 97.00 | -59.10 | -87.73 | -24.37 | 95.08 | 142.01 | -26.97 | 316.15 |
| Lonchur<br>a_punct<br>ulata          | 101.00        | 97.86 | 158.93 | -12.20 | 407.83 | 99.61  | -91.22 | -99.54 | -73.30      | 93.36  | -88.53 | -99.99 | -27.20      | 89.96 | -30.98 | -64.20 | 6.55   | 59.04 | -19.50 | -94.34 | 209.58 |
| Lonchur<br>a_striata                 | 65.00         | 77.81 | 53.23  | -63.84 | 255.97 | 99.25  | -92.20 | -99.55 | -72.40      | 92.63  | -93.57 | -99.99 | -33.43      | 67.81 | 13.44  | -39.08 | 76.74  | 84.33 | -65.39 | -99.01 | 37.57  |
| Loriculu<br>s_vernal<br>is           | 111.00        | 94.89 | 231.33 | -57.92 | 832.29 | 70.59  | 64.53  | -86.91 | 423.17      | 97.80  | -96.34 | 100.00 | -67.33      | 92.99 | 64.80  | -13.87 | 162.82 | 99.50 | -93.72 | -99.90 | -74.48 |
| Machlol<br>ophus_x<br>anthoge<br>nys | 75.00         | 79.15 | 83.89  | -75.62 | 377.41 | 86.76  | -68.76 | -99.27 | 18.40       | 97.01  | -94.83 | 100.00 | -57.78      | 76.26 | -20.39 | -60.11 | 28.64  | 89.29 | -64.63 | -98.46 | 3.62   |
| Merops_<br>leschen<br>aulti          | <b>36.00</b>  | 50.45 | 0.81   | -82.22 | 123.84 | 59.31  | -18.98 | -94.94 | 157.18      | 56.83  | -15.57 | -97.57 | 197.90      | 51.18 | -0.81  | -47.96 | 50.42  | 89.23 | -60.10 | -96.52 | 3.88   |
| Merops_<br>orientali<br>s            | <b>108.00</b> | 99.86 | 214.77 | 46.61  | 437.86 | 77.13  | -28.74 | -74.80 | 32.55       | 98.03  | -88.78 | -99.91 | -52.48      | 91.36 | 30.74  | -11.44 | 76.17  | 92.79 | -58.17 | -93.44 | -5.98  |
| Merops_<br>philippin<br>us           | <b>20.00</b>  | 62.18 | -16.65 | -81.63 | 85.99  | 68.24  | -36.65 | -98.72 | 138.11      | 96.24  | -91.21 | -99.95 | -51.20      | 55.05 | -3.28  | -47.72 | 42.15  | 81.09 | -43.72 | -88.67 | 38.23  |
| Microcar<br>bo_niger                 | 105.00        | 97.14 | 191.14 | -30.62 | 523.37 | 99.26  | 344.30 | -6.10  | 922.85      | 95.76  | -82.77 | -99.87 | -32.22      | 65.11 | -9.98  | -46.19 | 39.75  | 92.53 | -61.63 | -95.84 | -8.56  |
| Mirafra_<br>affinis                  | <b>60.00</b>  | 85.88 | 41.94  | -26.76 | 129.68 | 86.48  | 43.84  | -25.50 | 123.94      | 83.34  | 34.27  | -28.02 | 106.30      | 85.49 | -17.43 | -42.48 | 10.91  | 84.94 | 13.02  | -8.28  | 34.92  |

|                                      |              |        |        |        |        |        |             |        |             |        |             |        |             |       |        |        |        |        |        |        |        |
|--------------------------------------|--------------|--------|--------|--------|--------|--------|-------------|--------|-------------|--------|-------------|--------|-------------|-------|--------|--------|--------|--------|--------|--------|--------|
| Mirafr<br>erythropt<br>era           | <b>32.00</b> | 51.79  | -1.54  | -51.85 | 65.10  | 55.91  | -4.23       | -48.59 | 44.26       | 63.86  | 12.03       | -40.61 | 78.44       | 89.86 | -19.36 | -42.09 | 4.27   | 50.19  | -0.07  | -26.76 | 28.75  |
| Mixornis<br>gularis                  | <b>42.00</b> | 58.18  | 14.02  | -77.62 | 169.13 | 67.11  | -38.97      | -99.64 | 162.09      | 94.80  | -93.62      | 100.00 | -42.19      | 84.46 | -30.69 | -73.62 | 16.36  | 90.54  | -70.50 | -99.12 | -2.58  |
| Motacilla<br>cinerea                 | <b>2.00</b>  | 100.00 | -73.36 | -83.51 | -59.51 | 100.00 | 1288.2<br>9 | 260.70 | 3105.2<br>8 | 100.00 | 1142.7<br>0 | 212.60 | 2660.7<br>7 | 92.14 | 32.46  | -17.96 | 124.72 | 99.03  | 85.93  | 9.94   | 165.03 |
| Motacilla<br>madera<br>spatensi<br>s | <b>84.00</b> | 84.55  | 110.31 | -73.65 | 455.70 | 79.69  | -57.07      | -98.94 | 65.06       | 89.78  | -83.88      | -99.97 | 3.10        | 58.08 | 6.03   | -47.02 | 69.50  | 67.64  | -31.25 | -95.15 | 107.01 |
| Mycteria<br>_leucoc<br>ephala        | <b>86.00</b> | 84.18  | 118.35 | -73.63 | 505.96 | 73.28  | 87.03       | -95.60 | 680.30      | 82.28  | -76.12      | -99.96 | 77.22       | 90.06 | -36.91 | -72.76 | 4.02   | 81.61  | -54.61 | -97.48 | 39.72  |
| Ocybero<br>s_birostr<br>is           | 107.00       | 91.86  | 201.45 | -61.43 | 767.13 | 67.83  | -37.30      | -99.01 | 140.39      | 96.58  | -95.86      | 100.00 | -59.96      | 66.85 | 19.91  | -57.33 | 111.49 | 97.00  | -88.33 | -99.74 | -48.06 |
| Oriolus_<br>kundoo                   | <b>22.00</b> | 61.75  | -13.54 | -74.85 | 70.31  | 91.73  | -62.15      | -95.42 | -5.16       | 99.73  | -94.91      | -99.99 | -76.51      | 72.21 | -13.85 | -49.66 | 25.91  | 96.19  | -65.39 | -94.78 | -20.30 |
| Oriolus_<br>xanthorn<br>us           | 103.00       | 99.24  | 174.16 | 3.50   | 411.10 | 82.18  | 61.68       | -62.92 | 271.61      | 100.00 | -99.04      | 100.00 | -95.33      | 98.88 | 165.75 | 18.09  | 356.87 | 100.00 | -95.47 | -99.64 | -86.71 |
| Orthoto<br>mus_sut<br>orius          | <b>68.00</b> | 99.30  | 70.46  | 9.60   | 131.64 | 96.09  | -33.12      | -56.56 | -6.41       | 99.43  | -54.77      | -78.02 | -27.97      | 72.59 | 9.36   | -15.97 | 36.20  | 96.69  | -27.88 | -50.65 | -3.89  |
| Ortygorn<br>is_pondi<br>cerianus     | <b>80.00</b> | 86.80  | 98.83  | -49.65 | 346.86 | 78.08  | 60.15       | -61.50 | 243.87      | 84.71  | -61.70      | -98.38 | 33.16       | 91.30 | -30.03 | -62.61 | 3.51   | 73.40  | -34.34 | -94.72 | 93.29  |
| Palaeor<br>nis_eup<br>atria          | 43.00        | 62.38  | 15.38  | -56.05 | 110.65 | 73.64  | 66.49       | -81.36 | 375.14      | 97.99  | -92.36      | -99.96 | -62.75      | 89.23 | 39.56  | -24.69 | 111.47 | 96.54  | -68.34 | -94.74 | -29.48 |
| Phyllosc<br>opus_tro<br>chiloides    | 113.00       | 99.91  | 350.66 | 42.10  | 845.00 | 99.93  | -83.60      | -96.91 | -63.63      | 98.76  | -94.04      | -99.98 | -67.11      | 59.35 | 5.73   | -31.68 | 49.90  | 88.50  | -49.89 | -92.72 | 7.01   |
| Ploceus<br>_philippi<br>nus          | <b>10.00</b> | 85.55  | -35.07 | -74.14 | 14.46  | 50.19  | 0.40        | -91.54 | 323.89      | 96.76  | -67.80      | -90.03 | -28.65      | 90.91 | -35.69 | -71.93 | 3.06   | 54.53  | -12.17 | -94.60 | 235.66 |
| Prinia_in<br>ornata                  | 13.00        | 83.19  | -27.09 | -62.71 | 14.63  | 65.51  | -11.16      | -51.04 | 37.23       | 63.10  | 7.98        | -27.34 | 51.34       | 81.51 | -15.82 | -45.71 | 13.74  | 80.74  | -8.06  | -22.58 | 7.41   |
| Prinia_s<br>ocialis                  | <b>62.00</b> | 92.43  | 44.40  | -9.58  | 110.48 | 99.84  | 110.88      | 28.96  | 197.64      | 57.11  | 4.14        | -31.07 | 44.95       | 78.61 | 12.65  | -13.72 | 44.28  | 96.44  | -13.44 | -25.51 | -1.31  |
| Prinia_s<br>ylvatica                 | 79.00        | 86.51  | 98.41  | -65.79 | 367.60 | 99.79  | -91.65      | -99.77 | -73.48      | 98.39  | -95.72      | 100.00 | -69.21      | 59.10 | 6.48   | -41.37 | 59.07  | 81.29  | -46.40 | -94.98 | 29.28  |
| Psilopog<br>on_hae<br>maceph<br>alus | <b>54.00</b> | 75.90  | 32.87  | -44.55 | 132.71 | 56.73  | -7.01       | -64.23 | 64.54       | 99.99  | -98.48      | 100.00 | -91.24      | 99.76 | 100.64 | 31.46  | 183.38 | 99.99  | -96.68 | -99.79 | -89.01 |

|                            |        |       |        |        |        |        |        |        |         |        |        |        |         |       |        |        |        |        |        |        |        |
|----------------------------|--------|-------|--------|--------|--------|--------|--------|--------|---------|--------|--------|--------|---------|-------|--------|--------|--------|--------|--------|--------|--------|
| Psilopogon_zealandicus     | 104.00 | 93.45 | 179.95 | -48.15 | 612.81 | 68.06  | -28.75 | -93.26 | 73.33   | 95.98  | -92.24 | -99.99 | -47.95  | 79.88 | 31.34  | -32.90 | 102.64 | 99.51  | -92.39 | -99.74 | -72.36 |
| Pycnonotus_caferr          | 37.00  | 52.24 | 0.86   | -24.92 | 29.48  | 99.96  | -46.07 | -63.29 | -27.77  | 100.00 | -84.99 | -93.06 | -75.07  | 98.04 | 30.79  | 3.92   | 58.30  | 100.00 | -65.99 | -80.01 | -50.30 |
| Pycnonotus_jocosus         | 31.00  | 53.84 | -3.82  | -60.04 | 65.84  | 99.75  | 174.70 | 29.57  | 369.07  | 55.29  | -5.38  | -62.11 | 63.37   | 60.91 | -5.13  | -36.30 | 27.57  | 97.91  | -49.93 | -79.18 | -16.55 |
| Pycnonotus_luteolus        | 112.00 | 97.05 | 292.17 | -58.17 | 930.15 | 90.34  | -70.22 | -99.10 | -1.15   | 99.35  | -98.75 | 100.00 | -87.54  | 89.96 | 54.96  | -22.80 | 144.59 | 99.46  | -93.40 | -99.88 | -73.55 |
| Rubigula_flaviventris      | 109.00 | 93.59 | 220.56 | -65.21 | 826.36 | 89.16  | -68.81 | -99.05 | 5.00    | 99.50  | -98.73 | 100.00 | -87.19  | 82.88 | 39.78  | -36.06 | 124.89 | 98.91  | -91.91 | -99.93 | -67.37 |
| Saxicola_caprata           | 64.00  | 73.99 | 47.56  | -73.79 | 234.53 | 99.75  | 793.74 | 15.35  | 2663.12 | 97.13  | 311.61 | -38.06 | 1003.73 | 58.01 | -4.72  | -42.55 | 39.94  | 93.13  | 48.52  | -9.69  | 118.93 |
| Saxicola_torquatus         | 70.00  | 84.50 | 75.38  | -55.28 | 272.61 | 99.39  | 331.75 | -0.20  | 863.92  | 91.56  | -74.30 | -99.55 | -7.03   | 73.83 | -13.99 | -46.58 | 23.00  | 83.06  | -40.81 | -88.82 | 22.92  |
| Saxicoloides_fulvatus      | 76.00  | 82.93 | 83.98  | -70.18 | 343.16 | 89.89  | 145.38 | -66.04 | 513.01  | 71.70  | -45.42 | -99.53 | 100.78  | 58.53 | -5.26  | -44.83 | 40.42  | 85.45  | -51.72 | -95.10 | 16.32  |
| Spilopelia_chinensis       | 71.00  | 99.34 | 79.50  | 14.41  | 149.03 | 63.95  | -9.60  | -47.46 | 35.50   | 99.86  | -79.43 | -94.82 | -56.84  | 80.41 | -11.08 | -31.91 | 8.80   | 99.79  | -68.32 | -87.60 | -43.11 |
| Spilopelia_senegalensis    | 56.00  | 87.55 | 34.88  | -18.22 | 93.69  | 100.00 | -79.03 | -89.87 | -66.68  | 99.95  | -81.91 | -96.30 | -62.10  | 99.35 | -35.09 | -55.25 | -13.31 | 89.76  | -52.82 | -87.05 | 4.11   |
| Spilopelia_suratensis      | 7.00   | 98.40 | -45.67 | -69.53 | -19.49 | 56.65  | 6.81   | -53.45 | 88.41   | 100.00 | -90.37 | -97.37 | -80.95  | 72.04 | -12.81 | -42.12 | 23.26  | 100.00 | -85.48 | -95.20 | -72.22 |
| Sterna_aurantia            | 81.00  | 80.95 | 100.35 | -78.06 | 521.01 | 96.09  | 820.28 | -80.45 | 3953.97 | 52.31  | -9.05  | -99.83 | 801.64  | 54.98 | 3.52   | -45.81 | 68.15  | 67.39  | -36.69 | -98.24 | 139.81 |
| Streptopelia_decussata     | 39.00  | 51.73 | 2.66   | -69.75 | 109.52 | 82.70  | 74.30  | -59.24 | 292.23  | 94.16  | -86.71 | -99.81 | -37.34  | 77.61 | 13.72  | -18.48 | 47.30  | 93.95  | -60.55 | -92.04 | -13.77 |
| Streptopelia_orientalis    | 47.00  | 62.84 | 25.94  | -87.14 | 219.88 | 81.53  | -59.60 | -98.93 | 45.50   | 95.01  | -92.03 | 100.00 | -41.52  | 73.70 | -17.60 | -59.72 | 28.32  | 86.96  | -61.32 | -98.11 | 15.54  |
| Streptopelia_tranquebarica | 15.00  | 69.40 | -26.77 | -84.31 | 63.84  | 68.48  | -43.14 | -98.17 | 153.31  | 67.90  | -59.50 | -99.96 | 488.09  | 94.15 | -38.68 | -70.84 | -4.18  | 78.36  | -52.23 | -98.13 | 65.78  |
| Sturnia_pagodarum          | 51.00  | 63.20 | 29.03  | -82.45 | 242.16 | 72.55  | 84.94  | -94.72 | 570.32  | 85.91  | -79.07 | -99.87 | 35.79   | 54.99 | 3.76   | -47.26 | 59.30  | 85.98  | -60.48 | -98.07 | 18.29  |

|                                         |              |       |        |        |        |        |        |        |             |        |        |        |        |       |        |        |        |       |        |        |        |
|-----------------------------------------|--------------|-------|--------|--------|--------|--------|--------|--------|-------------|--------|--------|--------|--------|-------|--------|--------|--------|-------|--------|--------|--------|
| Threskio<br>rnis_mel<br>anoceph<br>alus | 45.00        | 59.63 | 19.32  | -89.84 | 197.41 | 90.68  | 332.01 | -89.67 | 1771.3<br>3 | 70.09  | 21.10  | -45.76 | 103.50 | 69.99 | -13.81 | -55.23 | 34.06  | 69.41 | -19.22 | -69.18 | 42.20  |
| Treron_<br>phoenic<br>opterus           | <b>92.00</b> | 84.65 | 121.90 | -74.33 | 510.31 | 69.29  | -42.94 | -99.45 | 152.07      | 99.14  | -98.65 | 100.00 | -85.31 | 88.03 | 58.92  | -32.49 | 170.69 | 99.68 | -94.96 | -99.92 | -79.22 |
| Tringa_o<br>chropus                     | <b>96.00</b> | 85.20 | 127.02 | -75.83 | 525.72 | 97.48  | 641.11 | -78.03 | 2744.3<br>3 | 64.29  | -41.99 | -99.98 | 326.02 | 62.90 | -8.82  | -51.54 | 44.79  | 74.90 | -46.26 | -96.94 | 80.59  |
| Upupa_<br>epops                         | <b>90.00</b> | 90.86 | 119.91 | -49.96 | 407.44 | 88.93  | -59.18 | -96.13 | 4.98        | 96.24  | -88.35 | -99.97 | -41.64 | 76.00 | -17.04 | -55.71 | 22.89  | 77.48 | -40.10 | -90.82 | 37.79  |
| Vanellus<br>_indicus                    | 49.00        | 87.60 | 27.71  | -13.98 | 74.09  | 100.00 | 337.35 | 162.61 | 539.82      | 100.00 | 116.71 | 52.54  | 179.44 | 89.71 | -15.31 | -33.89 | 3.64   | 99.98 | 25.68  | 12.33  | 39.23  |
| Vanellus<br>_malaba<br>ricus            | 59.00        | 75.11 | 41.65  | -60.48 | 173.51 | 91.85  | -70.70 | -97.62 | -8.54       | 96.69  | -94.37 | -99.99 | -61.84 | 61.63 | -7.91  | -51.08 | 39.38  | 86.69 | -56.32 | -95.70 | 18.92  |
| Zosterop<br>s_palpe<br>brosus           | <b>28.00</b> | 53.46 | -5.98  | -83.21 | 137.38 | 69.00  | -43.22 | -98.48 | 133.97      | 96.49  | -95.57 | 100.00 | -58.46 | 84.74 | -30.38 | -71.83 | 14.52  | 94.50 | -77.14 | -99.23 | -24.89 |

**Table S9. Effects of the transition to ZBNF, and of farming system-wise effects of increasing landscape-level agricultural productivity and of economic profit for each trophic guild.** The posterior distribution (PD) and estimated percentage change in abundance (with lower and upper 95% Bayesian credible intervals) are shown.

| Trophic guild | Effect of the transition to ZBNF |          |                   |                   | Effect of agricultural productivity in ZBNF systems |          |                   |                   | Effect of agricultural productivity in agrichemical systems |          |                   |                   | Effect of economic profit in ZBNF systems |          |                   |                   | Effect of economic profit in agrichemical systems |          |                   |                   |
|---------------|----------------------------------|----------|-------------------|-------------------|-----------------------------------------------------|----------|-------------------|-------------------|-------------------------------------------------------------|----------|-------------------|-------------------|-------------------------------------------|----------|-------------------|-------------------|---------------------------------------------------|----------|-------------------|-------------------|
|               | PD                               | % change | % change lower CI | % change upper CI | PD                                                  | % change | % change lower CI | % change upper CI | PD                                                          | % change | % change lower CI | % change upper CI | PD                                        | % change | % change lower CI | % change upper CI | PD                                                | % change | % change lower CI | % change upper CI |
| Frugivore     | 99.21                            | 160.25   | 9.47              | 374.10            | 78.50                                               | -33.68   | -82.18            | 29.93             | 100.00                                                      | -97.72   | -99.97            | -91.74            | 81.61                                     | 29.21    | -24.72            | 89.99             | 100.00                                            | -93.10   | -99.09            | -81.98            |
| Granivore     | 77.55                            | -20.25   | -55.80            | 21.97             | 86.19                                               | -40.28   | -79.34            | 13.21             | 85.01                                                       | -48.48   | -90.34            | 17.77             | 99.05                                     | -38.99   | -60.20            | -15.57            | 97.43                                             | -51.76   | -77.76            | -19.21            |
| Invertivore   | 97.68                            | 48.98    | 1.44              | 100.69            | 81.13                                               | -24.60   | -63.33            | 18.92             | 99.99                                                       | -85.89   | -96.36            | -70.61            | 92.86                                     | -24.17   | -48.28            | 1.20              | 99.95                                             | -56.86   | -77.71            | -36.45            |
| Omnivore      | 50.39                            | -0.20    | -33.28            | 33.91             | 75.55                                               | -18.29   | -56.47            | 23.74             | 100.00                                                      | -82.23   | -94.30            | -67.27            | 88.11                                     | -15.65   | -35.16            | 5.99              | 99.99                                             | -56.56   | -74.36            | -36.46            |
| Vertivore     | 98.19                            | 80.85    | 0.89              | 176.85            | 99.88                                               | 189.25   | 38.95             | 393.35            | 94.83                                                       | -58.09   | -87.86            | -13.40            | 93.33                                     | -21.89   | -44.15            | -0.28             | 99.16                                             | -52.23   | -76.16            | -25.05            |

**Table S10. Complete set of interview questions.**

**1. Background and socioeconomic details.**

- a. What is your name?
- b. What is the name of your village?
- c. How many dependents are there in your household (i.e., people eating from the same cooking pot)?  
Please state the number of adults and children

**2. Fields managed and crops grown**

- a. How many fields do you own or manage?
- b. What is the size of each field?
- c. Which crops did you grow in each field in each season in 2022?
  - i. Were the crops grown representative of what you grew in the previous four calendar years, or did you grow different crops?
    1. If the latter, please state what the differences were?
- d. Which of these is the field that falls within our study site ('focal field')?
- e. For the field in our study site (focal field), which crops did you grow in each season over the last five years (or as long as you can remember)?

If you can, please include the variety.

- i. Was it the main crop or an intercrop?
- i. Was the crop is grown in the whole field or only a fraction of it?
  1. If the latter, how big was the area of where the crop was grown?

*If unknown, ask for the total number of plants planted and the number of plants in 1 m<sup>2</sup>*
- ii. Was the crop seeded/planted in the same growing season it was harvested in?
  1. If not, please state the month and year the crop was sown/planted.
  2. If not, please state the age of the crop when you started harvesting it.
- iii. For each crop in each season, how many kilograms did you harvest?

If you can, please include both the weight at harvest and the weight after processing the crop (e.g., after drying, dehusking, deshelling, i.e. as sold on the market).

1. What proportion (or how many kilogrammes) did you keep for your own consumption and what proportion did you sell at the market?  
Please state if this is the proportion of the weight at time of harvest or sold at the market.
2. For how much (INR) did you sell the crop at the market?

- Please include the unit of measurement, e.g., per bag, per kg, total harvest
3. What is the current price per kilogramme?
  4. Did you receive a price premium?
    - a. If so, please state why.
  - iv. Did you grow any non-food plants? E.g, marigold, fodder grasses, native trees or bushes
    1. If so, which and how many?  
Please include the unit of measurement; e.g. number of plants, area of coverage
    2. Why did you grow these plants? *E.g. medicinal, fodder, habitat for natural enemies/pollinators*
    3. Where did you get the seeds/seedlings from?
      - a. If you bought them, how much did you pay?  
Please include the unit.
    4. Did you sell the plants or its products?
      - a. If so, for how much?
    - b. Are there any trees, bushes, or other vegetation in the approximately 1 km surrounding any of your fields from which you collect any items or make use of in any other way? *For example, coconuts, neem, tamarind, toddy, palm wine, grasses for fodder, firewood, grazing for livestock etc.*
      - i. If so, please specify the plant, the item and quantity collected, the intended use, and whether the plants were planted (by you or other villagers).
  3. **Ownership.** Questions concern the focal field only.
    - a. Are you the owner of the field or do you have to pay any rent, lease, tax, or similar for the field?
    - b. How much are you paying (in rupees and/or fraction of crop harvested)? Please include the time period.
  4. **Seeds.** Questions concern the focal field only. Please answer the following questions for each growing season the past five calendar years. Please specify the unit used.
    - a. Where did you get the seeds/seedlings from?
    - b. How many seeds or seedlings did you plant?
    - c. Did you buy them?
      - i. If so, how much did you pay (per unit or in total)?
  5. **Irrigation.** Questions concern the focal field only. Please answer the following questions for each calendar year or for each 'round' per year for the past five calendar years. Please specify the unit used.
    - a. Do you irrigate your field?
      - i. If so, how much water do you use (please state the unit)?



- ii. If so, how much do you pay for the water

6. **Inputs.** Questions concern the focal field only. Please answer the following questions for each calendar year or for each 'round' per year for the past five calendar years. Please specify the unit used.

a. Did you use any form fertilizer or other form of soil treatment?

- i. If so, what is the name or type?
- ii. Did you buy or make it yourself?
- iii. What ingredients does it contain?
- iv. How many kg or litres did you apply per round?
- v. How many rounds did you conduct in the year?
- vi. What is the cost per kg/litre/bottle/round?

If per bottle, please state how many litres/kg there are in a bottle.

If hand-made but you had to purchase the ingredients, how much did you pay for the ingredients?

b. What other substances did you add to your field?

This may include herbicides ("weedicides"), fungicides, and insecticides, including any other hand-made or locally sourced solutions.

- i. Did you buy or make it yourself?
- ii. What ingredients does it contain?
- iii. Why did you apply it? *E.g. to control pests*
- iv. How many kg or litres did you apply per round?
- v. How many rounds did you do in the year?
- vi. What is the cost per kg/litre/bottle?

*If per bottle, please state how many litres/kg there are in a bottle.*

*If hand-made but you had to purchase the ingredients, how much did you pay for the ingredients?*

7. **Farming practice.** Questions concern the focal field only.

*Questions on input, intercropping, and costs and are covered separately.*

Please provide information for 2022. If what you did in 2022 differs from what you did in the previous four years differs then please provide information for these years separately.

a. Since when have you farmed the field?

b. Do you have a name for the farming practice you are using?

- i. If so, what is it?
- ii. If ZBNF, can you please state and briefly describe the 'wheels' of ZBNF you are using?

You may refer to the inputs you described above.

c. Did you use cover crops?

1. If so, which ones?
- d. Did you till or plough your field?
  - i. If so, how often?
- e. Did you install any bird perches?
- f. Did you install any traps to catch pests?
- g. Did you do anything else to attract pollinators and/or to prevent or limit damage by pests and/or disease?
- h. Have you always farmed with the methods you used in 2022?
  - i. If not, when did you change the management? *E.g. transition to ZBNF*
  - ii. If not, how did you manage the field before?  
Please give a very brief description, stating whether you added any inputs, what the ingredients were, whether they represent agro-chemicals, if you used cover and/or intercrops, and if you tilled the land.
- i. Do you know how the field was managed before you did (by either a family member or previous tenant)?
  - i. If so, please give the same details as above (3.h.ii) and include the time period (YY – YY).
- j. Do you know when the land was cleared for agriculture?
  - i. If so, please state when.
- k. Are you managing your other fields using the same farming practice?

**8. Equipment.** Please answer the following questions for each calendar for the past five years.

Since one set up equipment is likely to be used for all fields, please provide the information for all your fields (rather than the focal field only).

- a. What farm equipment did you buy? For example, machete, axe, digging hoe, sharpening stone, bucket, irrigation pipes, sacks, boots, socks
- b. How many pieces of each equipment did you buy?
- c. How much did you pay for each item?  
Please state also state the current price if it differs from what you paid.
- d. How long do you expect each item to last before you have to buy a new one?
- e. Is there any other equipment that you use but haven't bought in the last five years? *E.g. tractor, sprayer*
  - i. If so, please provide the same details as above.
- f. Did you rent any equipment or livestock?
  - i. If so, what item(s) or livestock did you rent and how many of each?
  - ii. How much did you pay per rental?
    1. If the equipment requires petrol or electricity to run, please state whether this is included in the rental price.
  - iii. How many times did you rent it per year?

## 9. Livestock.

- a. Do you own any livestock and/or poultry?
  - i. If so, which ones and how many of each category? How much did you pay for their feed every year for the past five years?
  - ii. How much did you pay for their veterinary bills every year for the past five years?
  - iii. How much did you pay for their shelter every year for the past five years?
  - iv. Did you pay anything else for their upkeep?
    1. If so, please specify the type and amount (in INR).
  - v. How much would you be able to sell them for?
  - vi. How long do they live?
  - vii. Did you use them to manage your fields? *E.g. cows to plough the land*
    1. If so, how many times did you use them each year?  
*You can break your answer down by season if needed.*
    2. Each time you used them, how many days did you use them for?
    3. How many animals did you use?
  - viii. Do you use any of their products (e.g., cow dung or urine) to grow your crops?
    1. If so, are these the ones discussed in Q6?
      - a. If not, please specify.

## 10. Labour. Questions concern the focal field only. Please answer the following questions for each calendar year for the past five years.

If unable to answer per year, then specify if the information is per growing season or per month.

- a. What is the local basic daily wage rate?
- b. Please indicate if you conducted the following tasks at any point:
  - i. Clearance of leaf litter and twigs
  - ii. Tree felling
  - iii. Pruning
  - iv. Burning
  - v. Tilling
  - vi. Mulching
  - vii. Irrigating
  - viii. Spraying
  - ix. Fertilising
  - x. Weeding
  - xi. Carrying and planting/sowing
  - xii. Levelling (the ground)

- xiii. Harvesting
- xiv. Processing of crop
- xv. Transporting to point of sale
- xvi. Selling

- c. How many people were involved (including you if you took part)?
- d. Were the other people paid or unpaid?
- e. How many days did it take per round?
- f. How many rounds were there per year?
- g. Were there any other tasks that we haven't discussed yet?
  - i. If so, please provide the same details as for the other tasks.

11. **Energy.** Questions concern the focal field only. Please answer the following questions for each calendar year for the past five years.

If unable to answer per year, then specify if the information is per growing season or per month.

- a. Do you use any electricity, petrol, or gas to perform any of the tasks described above?
  - i. If so, how much did you use? Please include the unit.
  - ii. How much did you pay (per unit)?

12. **Transport.** Please answer the following questions for each calendar year for the past five years. If unable to answer per year, then specify if the information is per growing season or per month. Please state if the information is for the crops grown at the focal field only, or for crops from all your fields.

- a. What is the cost of transportation to the point of sale (other than labour)? *E.g. fuel cost.*
  - i. *Please specify how many units (e.g. bags, kg) that covers.*
